# Supplementary material for: ICAM1 initiates CTC cluster formation and trans-endothelial migration in lung metastasis of breast cancer
Source: PubMed Central journal article supplement (PMC8358026; doi:10.1038/s41467-021-25189-z), 2021-08-11

# Figure 1 Source Data

| Fig 1d | PDX type | Primary Tumor ICAM1 % | Lung Mets ICAM1 % |
|--------|----------|-----------------------|-------------------|
|        | TN1      | 0.1                   | 8                 |
|        | TN1      | 1.2                   | 60.7              |
|        | TN1      | 0.6                   | 91.2              |
|        | TN2      | 2.2                   | 7.4               |
|        | TN2      | 2.9                   | 19.3              |
|        | TN2      | 4                     | 16.8              |
|        | TN3      | 32                    | 99                |
|        | TN3      | 26.5                  | 45.9              |
|        | TN3      | 33.1                  | 68.1              |
|        | Average  | Primary Tumor         | Lung Metastasis   |
|        | TN1      | 0.633333333           | 53.3              |
|        | TN2      | 3.033333333           | 14.5              |
|        | TN3      | 30.53333333           | 71                |
|        | SD       |                       |                   |
|        | TN1      | 0.550757055           | 42.09073532       |
|        | TN2      | 0.907377173           | 6.274551777       |
|        | TN3      | 3.536005279           | 26.66852077       |

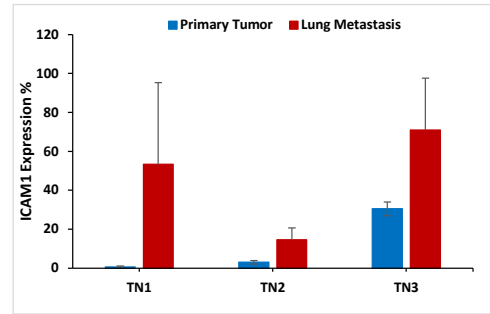

| Fig 1j | TN1- Lung mets BLI | ICAM1 OE    |
|--------|--------------------|-------------|
|        | Con                |             |
|        | 1.363738158        | 8.156564851 |
|        | 3.435571341        | 11.77442128 |
|        | 1.537690274        | 10.15922578 |

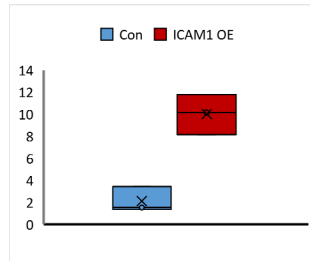

| Fig 1m | 231- Lung mets BLI | siCon | siCAM1 |
|--------|--------------------|-------|--------|
|        |                    | 0.68  | 0.08   |
|        |                    | 0.38  | 0.39   |
|        |                    | 0.58  | 0.14   |
|        |                    | 0.48  | 0.13   |

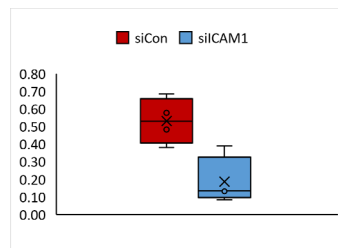

## Figure 2 Source Data

**Fig 2c** BC Patient CTC data

| %  | ICAM1+ CD45- | Singles    | Clusters |
|----|--------------|------------|----------|
| 1  | 0.000000     | 0.000000   |          |
| 2  | 0            | 0          |          |
| 3  | 0            | 0          |          |
| 4  | 0.00058777   | 0.00099985 |          |
| 5  | 0.0002883    | 0.00035732 |          |
| 6  | 0.004016     | 0.000000   |          |
| 7  | 0.003009     | 0.000000   |          |
| 8  | 0.011194     | 0.000000   |          |
| 9  | 0.0108729    | 0.00760109 |          |
| 10 | 0.026432     | 0.000000   |          |
| 11 | 0.047619     | 0.000000   |          |
| 12 | 0.1          | 0.000000   |          |
| 13 | 0.10526316   | 0.000000   |          |
| 14 | 0.16666667   | 0.03703704 |          |
| 15 | 0.005131     | 0.007585   |          |
| 16 | 0.002165     | 0.009346   |          |
| 17 | 0.002705     | 0.010169   |          |
| 18 | 0.002869     | 0.017647   |          |
| 19 | 0.004383     | 0.018223   |          |
| 20 | 0.000643     | 0.019017   |          |
| 21 | 0.00730927   | 0.020906   |          |
| 22 | 0.00127138   | 0.02998362 |          |
| 23 | 0.013713     | 0.036900   |          |
| 24 | 0.033333     | 0.057143   |          |
| 25 | 0.03496503   | 0.05714286 |          |
| 26 | 0.01485934   | 0.1211422  |          |
| 27 | 0.03846154   | 0.125      |          |
| 28 | 0.03477748   | 0.137097   |          |
| 29 | 0.041342     | 0.184532   |          |
| 30 | 0.071749     | 0.205882   |          |
| 31 | 0.028369     | 0.208835   |          |
| 32 | 0.025907     | 0.219780   |          |
| 33 | 0.05882353   | 0.250000   |          |
| 34 | 0.009097     | 0.256745   |          |
| 35 | 0.009042     | 0.273552   |          |
| 36 | 0.055762     | 0.297975   |          |
| 37 | 0.046526     | 0.396721   |          |
| 38 | 0.004373     | 0.467532   |          |
| 39 | 0.01722575   | 0.500000   |          |
| 40 | 0.100000     | 0.500000   |          |
| 41 | 0.046358     | 0.558824   |          |
| 42 | 0.128931     | 0.632057   |          |
| 43 | 0.002346     | 0.660482   |          |
| 44 | 0            | 0.666667   |          |
| 45 | 0.114754     | 0.687500   |          |
| 46 | 0.1147541    | 0.6875     |          |
| 47 | 0.05825243   | 0.77777778 |          |
| 48 | 0.157895     | 0.835294   |          |
| 49 | 0.224806     | 1.000000   |          |
| 50 | 0.23529412   | 1          |          |
| 51 | 0.00650234   | 0.993056   |          |

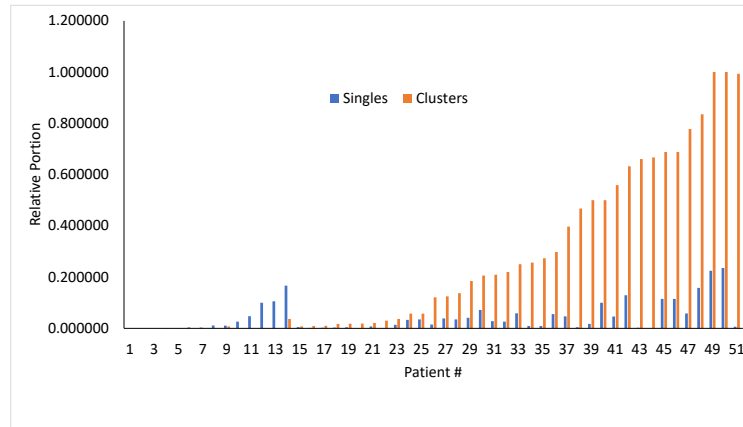

**Fig 2d** TN1 aggregation

| Hours | ICAM1+   | ICAM1-   | ICAM1+ (Std Err) | ICAM1- (Std Err) |
|-------|----------|----------|------------------|------------------|
| 0     | 430.925  | 324.4    | 55.39558         | 45.69983         |
| 1     | 902.35   | 614.925  | 77.57028         | 56.8914          |
| 4     | 1159.575 | 750.425  | 67.96844         | 56.64291         |
| 8     | 1272.275 | 859.95   | 64.40472         | 55.07319         |
| 12    | 1399.525 | 977.65   | 58.75548         | 59.1491          |
| 16    | 1506.4   | 1024.4   | 54.41523         | 52.46752         |
| 20    | 1622.7   | 1117.975 | 60.32451         | 34.88438         |
| 24    | 1678.975 | 1211.8   | 62.40241         | 38.16537         |

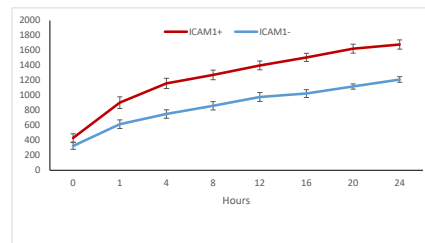

**Fig 2f** 231 aggregation

| Hours | 231 siCon | 231 siICAM1 | 231 siCon (Std Dev) | 231 siICAM1(Std Dev) |
|-------|-----------|-------------|---------------------|----------------------|
| 0     | 3909.489  | 4117.917    | 601.5955            | 406.3486             |
| 1     | 5493.189  | 5285.05     | 527.6917            | 832.7318             |
| 2     | 9626.51   | 8640.222    | 1500.192            | 1557.587             |
| 4     | 24901.68  | 12715.75    | 7290.848            | 2989.454             |
| 6     | 52061.35  | 14744.43    | 23281.75            | 2960.499             |
| 8     | 61409.54  | 14945.16    | 17149.39            | 2650.304             |
| 10    | 86659.21  | 14049.85    | 26067.09            | 2447.673             |
| 12    | 95195.88  | 12996.04    | 36073.21            | 1769.213             |
| 14    | 94552.31  | 11738.71    | 33233.36            | 1458.859             |
| 16    | 112093.3  | 12242.66    | 41117.04            | 1798.081             |
| 18    | 109234.3  | 11318.44    | 30983.1             | 1768.445             |
| 20    | 113271.4  | 10544.6     | 38052.67            | 1695.872             |

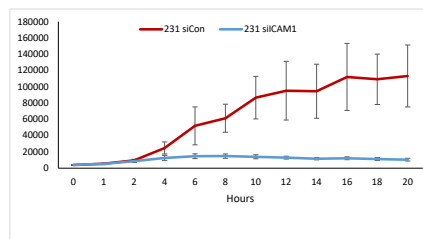

**Fig 2i** Solid phase self-interaction

| BSA   | ICAM1 |
|-------|-------|
| 0.202 | 0.651 |
| 0.202 | 0.65  |
| 0.269 | 0.605 |
| 0.269 | 0.605 |
|       | 0.704 |
|       | 0.703 |

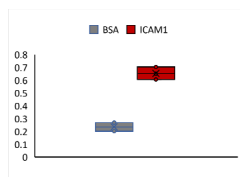

### Figure 3 Source Data

**Fig 3e**

231 Mammosphere

|        |    |    |    |
|--------|----|----|----|
| siCon  | 67 | 73 | 77 |
| siCAM1 | 39 | 42 | 34 |
| siCDK6 | 38 | 53 | 46 |

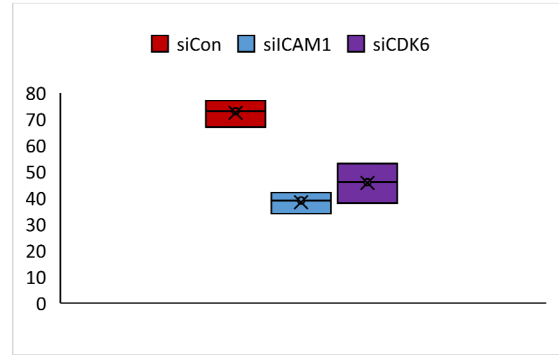

**Fig 3h**

231 BLI Lung Metastasis

|        |            |            |            |
|--------|------------|------------|------------|
| siCon  | 6.08175166 | 2.78633303 | 5.4786357  |
| siCAM1 | 0.7813712  | 0.48766357 | 0.62474464 |
| siCDK6 | 2.34135703 | 2.11040463 | 1.17713264 |

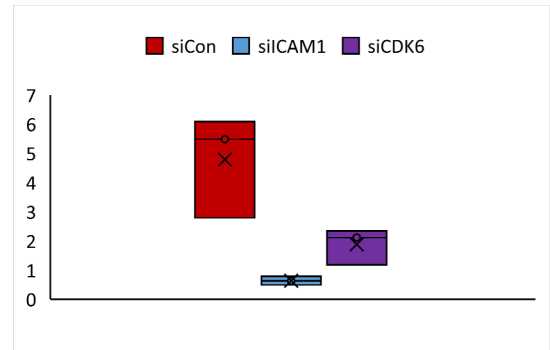

**Fig 3j**

231 Proliferation

| siCon   | siCAM1 | siCDK6 |
|---------|--------|--------|
| 75,000  | 55,000 | 30,000 |
| 60,000  | 35,000 | 60,000 |
| 110,000 | 35,000 | 55,000 |
| 85,000  | 50,000 | 55,000 |

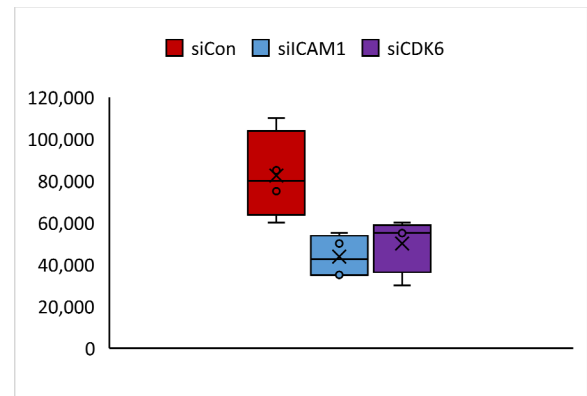

# Figure 4 Source Data

Fig 4b

| TEM              | siCon       | EC siCAM1   | Tumor siCAM1 | Tumor+EC siCAM1 |
|------------------|-------------|-------------|--------------|-----------------|
| Normalized value | 1.371428571 | 0.829411765 | 0.428571429  | 0.084507042     |
|                  | 0.771428571 | 0.776470588 | 0.514285714  | 0.042253521     |
|                  | 0.857142857 | 0.952941176 | 0.385714286  | 0.042253521     |
|                  | 0.970588235 |             |              |                 |
|                  | 0.988235294 |             |              |                 |
|                  | 1.041176471 |             |              |                 |

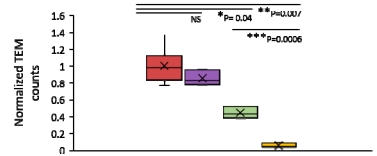

Fig 4d

| hours | 231 Con, HUVEC Con | 231 siCAM1, HUVEC siCAM1 | 231 Con, H Con | 231 siCAM1, H siCAM1 (Std Dev) |
|-------|--------------------|--------------------------|----------------|--------------------------------|
| 0     | 6082.662           | 2336.872                 | 407.5376       | 128.7943                       |
| 1     | 6115.067           | 2773.158                 | 200.3974       | 395.0648                       |
| 2     | 6445.974           | 3119.597                 | 537.0887       | 1223.719                       |
| 3     | 6851.437           | 3389.927                 | 840.3333       | 622.6345                       |
| 4     | 7479.038           | 3982.055                 | 80.91919       | 216.4259                       |
| 5     | 8352.982           | 4141.219                 | 336.4865       | 522.0744                       |
| 7     | 9909.662           | 4064.393                 | 16.41468       | 536.432                        |
| 9     | 11923.92           | 4258.316                 | 1387.034       | 772.7932                       |
| 11    | 14074.99           | 4274.921                 | 1809.347       | 788.6356                       |
| 13    | 16038.07           | 4401.558                 | 2596.879       | 825.379                        |
| 15    | 21612.98           | 4445.483                 | 7270.891       | 1101.053                       |
| 17    | 21157.72           | 4444.65                  | 6632.421       | 879.8031                       |
| 19    | 21057.63           | 4578.458                 | 6005.09        | 953.2828                       |
| 21    | 21755.47           | 4883.174                 | 7132.669       | 1357.725                       |
| 22    | 24289.24           | 4768.68                  | 10092.5        | 1220.397                       |
| 23    | 26629.43           | 4914.341                 | 11274.72       | 1219.776                       |
| 25    | 28708.99           | 5274.828                 | 12438.76       | 1500.564                       |
| 27    | 28015.88           | 5143.908                 | 10519.14       | 1400.693                       |
| 28    | 29189.56           | 5389.575                 | 12691.26       | 1339.827                       |
| 29    | 29608.51           | 5806.262                 | 13090.31       | 1399.888                       |
| 30    | 33035.21           | 5667.34                  | 16600.21       | 1461.637                       |

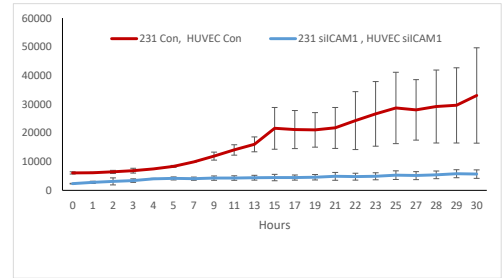

Fig 4f

| TN1- BLI Lung Metastasis | ICAM1 -     | ICAM1 +     |
|--------------------------|-------------|-------------|
|                          | 0.014604248 | 0.054165773 |
|                          | 0.022973191 | 0.031653066 |
|                          | 0.022576277 | 0.045108995 |
|                          | 0.013320811 | 0.062488562 |

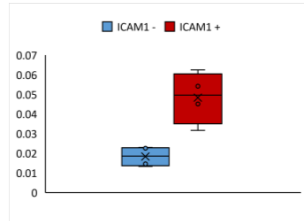

Fig 4h

| 231 anti-ICAM1- BLI Lung Metastasis | IgG         | anti-ICAM1  |
|-------------------------------------|-------------|-------------|
|                                     | 0.222385638 | 0.119469457 |
|                                     | 0.262913236 | 0.172924433 |
|                                     | 0.237179596 | 0.149487824 |

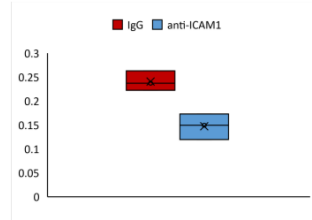

Fig 4i

| 231 anti-ICAM1- CTCs | IgG   | anti-ICAM1 |
|----------------------|-------|------------|
|                      | 0.001 | 0.004      |
|                      | 0.002 | 0.005      |
|                      | 0.005 | 0.007      |

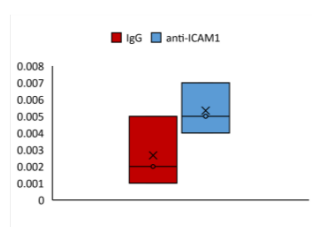

### Figure 5 Source Data

**Fig 5d**

231 anti-ICAM1 aggregation

| Hours | IgG      | anti-ICAM1 | IgG (Std Error) | anti-ICAM1 (Std Error) |
|-------|----------|------------|-----------------|------------------------|
| 0     | 5549.44  | 5427.845   | 1224.091        | 851.6711               |
| 1     | 8621.747 | 6393.455   | 1467.624        | 689.8127               |
| 2     | 10579.63 | 7136.274   | 1845.597        | 889.0221               |
| 4     | 10435.16 | 7027.778   | 1667.121        | 1077.82                |
| 6     | 11637.11 | 6284.472   | 2780.29         | 713.9831               |
| 8     | 14539.71 | 7106.873   | 3900.012        | 948.1987               |
| 9     | 15317.58 | 7975.35    | 3438.528        | 1166.738               |
| 10    | 19416.86 | 8117.873   | 4031.604        | 718.4599               |
| 12    | 23252.62 | 9271.74    | 6013.579        | 1150.226               |
| 14    | 28605.63 | 11072.15   | 7307.527        | 1769.576               |

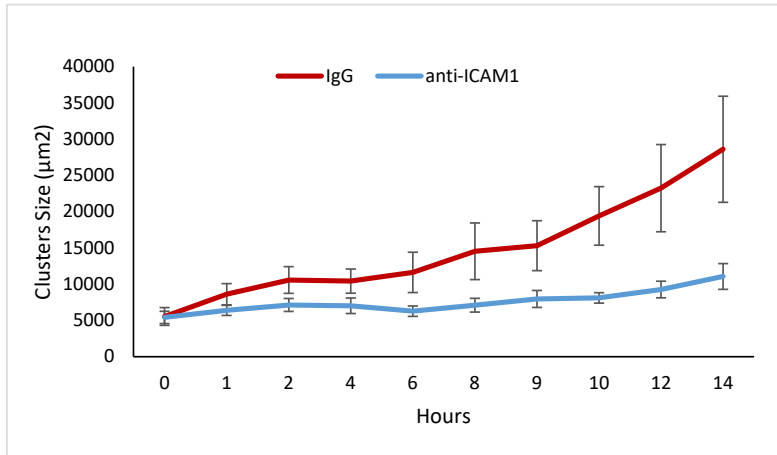

**Fig 5f**

231 anti-ICAM1 TEM

| IgG   | anti-ICAM1 |
|-------|------------|
| 14400 | 4200       |
| 8700  | 3600       |
| 14700 | 4500       |
| 9300  | 2100       |

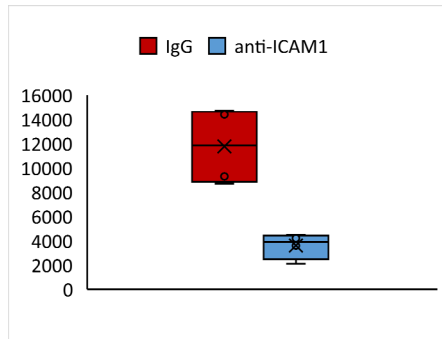

**Fig 5h**

231 anti-ICAM1 Spontaneous Lung Metastasis

| IgG        | anti-ICAM1  |
|------------|-------------|
| 10615810.7 | 2484135.714 |
| 7746616.6  | 2410402.5   |
| 6935610    | 3344650     |

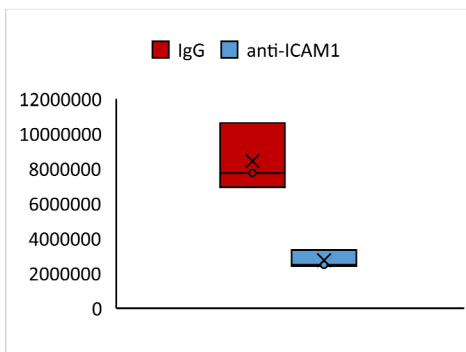

## Supplementary Figure 3 Source Data

**Supp. Fig 3a**

| CellSearch CTC patient | ICAM1+ cells |
|------------------------|--------------|
| 1                      | 0.118421053  |
| 2                      | 0.179586563  |
| 3                      | 0.212518195  |
| 4                      | 0.272727273  |
| 5                      | 0.310344828  |
| 6                      | 0.33853211   |
| 7                      | 0.409274194  |
| 8                      | 0.440217391  |
| 9                      | 0.571428571  |

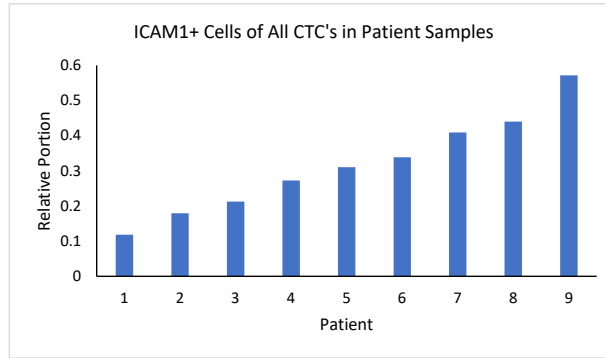

**Supp. Fig 3b**

| CellSearch CTC | ICAM1+ Singles | ICAM1+ Clusters |
|----------------|----------------|-----------------|
| 0.150882825    | 0.302013423    |                 |
| 0.359550562    | 0.414634146    |                 |
| 0.270454545    | 0.45           |                 |
| 0.394209354    | 0.666666667    |                 |
| 0.443181818    | 0.75           |                 |

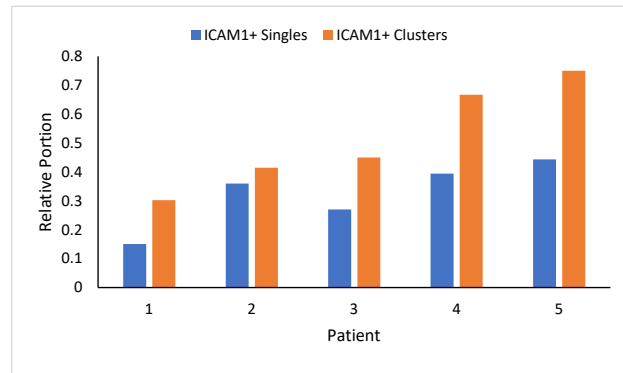

# Supplementary Figure 4 Source Data

Supp. Fig 4a TN3 sorted aggregation

| Hours | TN3 PDX ICAM1+ | TN3 PDX ICAM1- | TN3 ICAM1+ (Std Dev) | TN3 ICAM1- (Std Dev) |
|-------|----------------|----------------|----------------------|----------------------|
| 1     | 2574.659       | 1176.283       | 489.1741             | 49.21133             |
| 2     | 4807.611       | 1585.267       | 1050.225             | 591.0876             |
| 3     | 5285.108       | 1588.586       | 1104.387             | 495.7609             |
| 4     | 4810.473       | 1496.84        | 983.5862             | 278.3916             |
| 6     | 4658.361       | 1469.619       | 987.3871             | 187.509              |
| 8     | 4582.139       | 1471.918       | 854.562              | 192.3494             |
| 10    | 4841.159       | 1529.313       | 1211.901             | 201.2453             |
| 12    | 4773.554       | 1518.573       | 1229.11              | 193.4563             |
| 14    | 4735.881       | 1567.344       | 1025.854             | 227.158              |
| 16    | 4679.477       | 1549.6         | 1114.713             | 178.0369             |
| 18    | 4461.723       | 1540.884       | 833.4722             | 159.7352             |
| 20    | 4365.051       | 1553.131       | 856.7463             | 181.8796             |
| 22    | 4372.499       | 1569.819       | 813.0834             | 207.6947             |
| 24    | 4565.148       | 1551.204       | 1084.827             | 181.7327             |

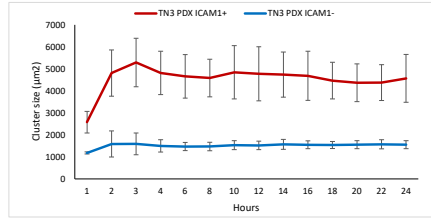

Supp. Fig 4b TN3 siICAM1 aggregation

| Hours | siCon       | siICAM1     | siCon (Std Err) | siICAM1 (Std Err) |
|-------|-------------|-------------|-----------------|-------------------|
| 0     | 4280.66475  | 2461.667875 | 148.4167        | 95.09427          |
| 2     | 4750.107    | 2815.68375  | 168.454         | 124.2972          |
| 4     | 5394.18525  | 3005.061125 | 239.4051        | 103.5349          |
| 6     | 5953.35525  | 3263.157875 | 286.4602        | 122.3945          |
| 8     | 6478.9185   | 3661.13625  | 170.4269        | 148.8595          |
| 10    | 7451.087375 | 4185.178125 | 659.592         | 219.1309          |
| 12    | 9052.211375 | 4411.162    | 1311.563        | 218.0944          |

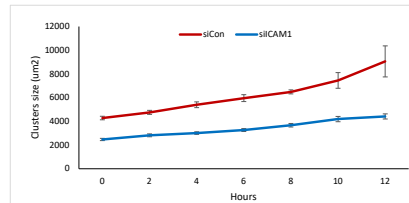

Supp. Fig 4e 231 siICAM1-siCD44 aggregation

| Hours | siCon    | siICAM1  | siCD44   | siCon (Std Err) | siICAM1 (Std Err) | siCD44 (Std Err) |
|-------|----------|----------|----------|-----------------|-------------------|------------------|
| 0     | 2349.732 | 2805.323 | 3005.371 | 437.3912        | 263.3069          | 82.67647         |
| 1     | 4317.074 | 3852.865 | 4379.593 | 108.3164        | 127.83            | 164.2082         |
| 2     | 7222.198 | 4709.058 | 6223.77  | 225.3395        | 140.2775          | 224.6801         |
| 3     | 17695.11 | 6309.468 | 10574.89 | 1238.762        | 266.5724          | 487.6923         |
| 4     | 33624.67 | 7818.349 | 16261.4  | 3441.553        | 394.8413          | 822.2631         |
| 5     | 43504.52 | 9684.26  | 23851.05 | 3052.02         | 409.5486          | 1554.748         |
| 6     | 65358.66 | 12735.04 | 34414.8  | 7049.584        | 697.3925          | 2930.504         |
| 8     | 96276.38 | 17997.36 | 65636.81 | 11204.41        | 1295.142          | 9853.377         |
| 10    | 127767   | 30881.14 | 94771.45 | 13479.65        | 3471.46           | 14089.95         |
| 12    | 147000.4 | 39887.24 | 110182   | 24980.44        | 4289.782          | 18726.87         |

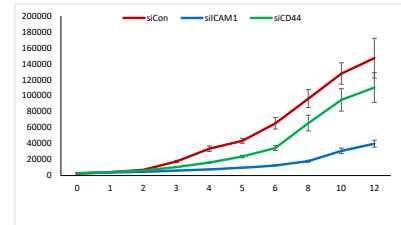

Supp. Fig 4f 231 sorted ICAM1-CD44 aggregation

| Hours | ICAM1+/CD44+ | ICAM1+/CD44- | ICAM1-/CD44+ | ICAM1+/CD44+ (Std Dev) | ICAM1+/CD44- (Std Dev) | ICAM1-/CD44+ (Std Dev) |
|-------|--------------|--------------|--------------|------------------------|------------------------|------------------------|
| 0     | 1239.609     | 435.3553     | 44.09368     | 651.9813               | 509.0635               | 62.35788               |
| 2     | 2371.979     | 280.5623     | 0            | 951.0353               | 363.1387               | 0                      |
| 4     | 3265.686     | 360.9356     | 0            | 712.5248               | 481.856                | 0                      |
| 6     | 4475.676     | 302.5161     | 0            | 1371.105               | 392.6228               | 0                      |
| 8     | 4348.195     | 480.7513     | 0            | 1012.827               | 399.4409               | 0                      |
| 10    | 3908.449     | 538.7988     | 0            | 872.6992               | 656.9166               | 0                      |
| 12    | 4049.772     | 545.1244     | 0            | 934.3884               | 357.389                | 0                      |
| 14    | 3484.703     | 472.9373     | 40.93084     | 835.0975               | 465.91                 | 57.88495               |
| 16    | 3630.64      | 722.2433     | 62.14046     | 890.405                | 662.2372               | 87.87988               |
| 18    | 4169.141     | 705.871      | 0            | 992.4384               | 670.4192               | 0                      |
| 20    | 4934.548     | 450.6114     | 163.7234     | 1517.316               | 353.5688               | 78.4078                |
| 22    | 6498.776     | 1218.623     | 294.8881     | 1682.987               | 978.0743               | 282.847                |

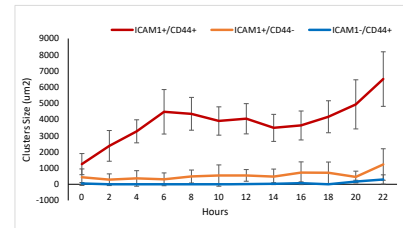

# Supplementary Figure 7 Source Data

Supp. Fig 7b 231 ICAM1 Targets- Mammosphere

|          |    |    |    |
|----------|----|----|----|
| siCon    | 67 | 73 | 77 |
| siCDK6   | 38 | 53 | 46 |
| siSec23a | 43 | 40 | 57 |
| siZeb1   | 29 | 33 | 31 |
| siICAM1  | 39 | 42 | 34 |

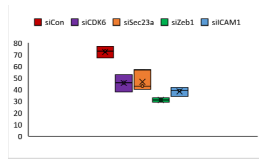

Supp. Fig 7f 231 ICAM1 Targets- Clustering

| Hours | siCon    | siICAM1  | siCDK6   | siSec23a | siZeb1   | siCon (Std Err) | siICAM1 (Std Err) | siCDK6 (Std Err) | siSec23a (Std Err) | siZeb1 (Std Err) |
|-------|----------|----------|----------|----------|----------|-----------------|-------------------|------------------|--------------------|------------------|
| 0     | 3436.997 | 3154.617 | 3300.99  | 3371.088 | 2989.282 | 470.6985        | 263.267           | 67.03857         | 187.3692           | 75.63711         |
| 2     | 4363.631 | 3557.592 | 5686.564 | 4133.271 | 3525.744 | 83.22063        | 105.871           | 207.8796         | 145.1611           | 93.92319         |
| 4     | 8627.543 | 4666.538 | 11819.25 | 6637.632 | 5404.232 | 320.0208        | 127.262           | 349.4126         | 286.2548           | 141.5246         |
| 6     | 16034.7  | 6104.704 | 20428.63 | 8697.621 | 9134.739 | 1083.226        | 237.5637          | 1024.3           | 430.7331           | 441.9329         |
| 8     | 24208.63 | 7843.595 | 26515.57 | 11797.29 | 13497.3  | 1531.498        | 511.3268          | 1950.815         | 897.3362           | 818.4231         |
| 10    | 33156.86 | 8815.676 | 34038.77 | 15823.3  | 15693.29 | 2891.486        | 549.91            | 1869.298         | 930.3239           | 1112.58          |
| 12    | 44247    | 9482.393 | 45731.29 | 18257.73 | 17016.51 | 3355.789        | 523.5018          | 3444.781         | 1119.36            | 1379.503         |
| 14    | 52064.65 | 9889.433 | 52943.1  | 24029.82 | 17947.79 | 3083.429        | 586.7422          | 5803.319         | 2077.457           | 1273.523         |
| 16    | 54892.16 | 9842.09  | 55435.34 | 26628.7  | 18693.38 | 2742.242        | 592.3599          | 7595.382         | 1745.12            | 1426.656         |
| 18    | 61327.04 | 10062.26 | 54102.41 | 30705.3  | 17906.83 | 3108.126        | 576.6551          | 3613.625         | 2392.868           | 1383.784         |
| 20    | 62398.83 | 10424.07 | 58048.04 | 36680.51 | 17979.48 | 2331.104        | 759.4388          | 4317.468         | 4302.082           | 1078.193         |

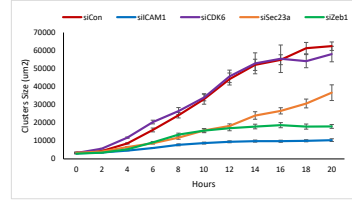

Supp. Fig 7h 231 ICAM1 Targets- BLI Lung Metastasis

| Normalized ci | siCon | Day 7 - lungs |            |            |            | Averages: | siCon | siSec231 | siZeb1 | siICAM1     | SD:         | siCon       | siSec231    | siZeb1      | siICAM1     |
|---------------|-------|---------------|------------|------------|------------|-----------|-------|----------|--------|-------------|-------------|-------------|-------------|-------------|-------------|
|               |       | Day 0         | Day 1      | Day 6      | Day 7      |           |       |          |        |             |             |             |             |             |             |
| 1             | 1     | 0.46190781    | 0.95617443 | 6.08175166 | 6.08175166 | 1         | 1     | 1        | 1      | 0.037539233 | 0.037539233 | 0.12066031  | 0.12066031  | 0.1762052   | 0.1762052   |
| 1             | 1     | 0.4884111     | 0.86254794 | 2.78633303 | 2.78633303 | 1         | 1     | 1        | 1      | 0.168133743 | 0.168133743 | 0.28296283  | 0.28296283  | 0.23750872  | 0.23750872  |
| 1             | 1     | 0.41432555    | 1.10198074 | 5.4786357  | 5.4786357  | 1         | 1     | 1        | 1      | 0.23750872  | 0.23750872  | 0.1762052   | 0.1762052   | 0.039659476 | 0.039659476 |
| siSec231      | 1     | 0.81541851    | 0.84311936 | 5.64522763 | 5.64522763 | 1         | 1     | 1        | 1      | 0.039659476 | 0.039659476 | 0.12066031  | 0.12066031  | 0.1762052   | 0.1762052   |
| 1             | 1     | 0.76362539    | 1.179561   | 5.55521346 | 5.55521346 | 1         | 1     | 1        | 1      | 0.12066031  | 0.12066031  | 0.28296283  | 0.28296283  | 0.23750872  | 0.23750872  |
| 1             | 1     | 0.5017808     | 0.61724736 | 2.46768951 | 2.46768951 | 1         | 1     | 1        | 1      | 0.1762052   | 0.1762052   | 0.039659476 | 0.039659476 | 0.12066031  | 0.12066031  |
| siZeb1        | 1     | 0.98839728    | 1.15452002 | 8.54369408 | 8.54369408 | 1         | 1     | 1        | 1      | 0.039659476 | 0.039659476 | 0.12066031  | 0.12066031  | 0.1762052   | 0.1762052   |
| 1             | 1     | 0.65250922    | 0.90532824 | 6.75039526 | 6.75039526 | 1         | 1     | 1        | 1      | 0.12066031  | 0.12066031  | 0.28296283  | 0.28296283  | 0.23750872  | 0.23750872  |
| siICAM1       | 1     | 0.19706929    | 0.28357666 | 0.7813712  | 0.7813712  | 1         | 1     | 1        | 1      | 0.039659476 | 0.039659476 | 0.12066031  | 0.12066031  | 0.1762052   | 0.1762052   |
| 1             | 1     | 0.2227191     | 0.25873886 | 0.48766357 | 0.48766357 | 1         | 1     | 1        | 1      | 0.12066031  | 0.12066031  | 0.28296283  | 0.28296283  | 0.23750872  | 0.23750872  |
| 1             | 1     | 0.14489275    | 0.14817428 | 0.62474464 | 0.62474464 | 1         | 1     | 1        | 1      | 0.039659476 | 0.039659476 | 0.12066031  | 0.12066031  | 0.1762052   | 0.1762052   |

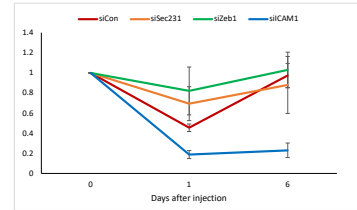

Supp. Fig 7i 231 ICAM1 Targets- BLI Lung Metastasis at day 7

|          | siCon      | siSec231   | siZeb1     | siICAM1    |
|----------|------------|------------|------------|------------|
| siCon    | 6.08175166 | 2.78633303 | 5.4786357  | 6.08175166 |
| siSec231 | 5.64522763 | 5.55521346 | 2.46768951 | 5.64522763 |
| siZeb1   | 8.54369408 | 6.75039526 | 2.46768951 | 8.54369408 |
| siICAM1  | 0.7813712  | 0.48766357 | 0.62474464 | 0.7813712  |

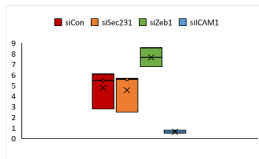

Supp. Fig 7j 231 ICAM1 Targets- Cell Cycle

| Cell cycle % | siCon      | siICAM1    | siCDK6     |
|--------------|------------|------------|------------|
| Apoptosis    | 3.5        | 3.2        | 0.8        |
| G0/G1        | 55.2       | 54         | 59.5       |
| S            | 15.7       | 13.7       | 13.3       |
| G2/M         | 26.4       | 30.5       | 22.8       |
| Average      | 4.43333333 | 4          | 1.43333333 |
| SD           | 0.80829038 | 1.92873015 | 0.56862407 |

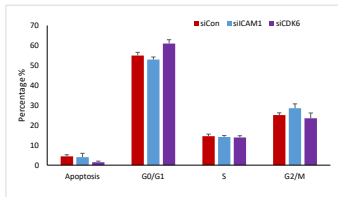



## Supplementary Figure 8 Source Data

### Supp. Fig 8b 231 siCAM1-siCDK6 BLI Lung Metastasis

|        |             |             |             |
|--------|-------------|-------------|-------------|
| siCon  | 0.32392284  | 0.51205147  | 0.38002314  |
| siCAM1 | 0.111722022 | 0.118344113 | 0.110805341 |
| siCDK6 | 0.30834558  | 0.41655929  | 0.47351564  |

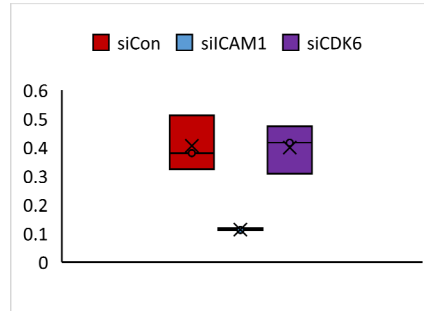

### 231 siCAM1-siCDK6 CTC

|        |         |         |         |
|--------|---------|---------|---------|
| siCon  | 0.00096 | 0.00075 | 0.00109 |
| siCAM1 | 0.0009  | 0.00143 | 0.00258 |
| siCDK6 | 0.00129 | 0.00005 | 0.00136 |

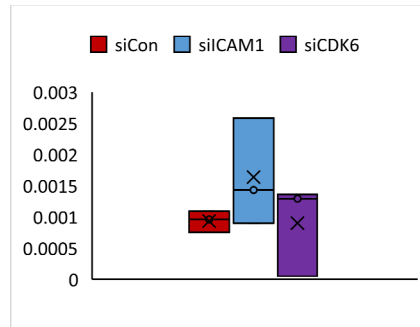

# Supplementary Figure 9 Source Data

**Supp. Fig 9c** 231- ICAM1 siRNAs- BLI Lung Metastasis Day 0

|           |             | Day 1 | Day 3       | Day 6       |             |
|-----------|-------------|-------|-------------|-------------|-------------|
| Averages: | siCon       | 1     | 0.301661435 | 0.443815698 | 1.090325041 |
|           | siICAM1- SP | 1     | 0.130091857 | 0.128032299 | 0.214195222 |
|           | siICAM1- A  | 1     | 0.18228931  | 0.164762887 | 0.274640732 |
|           | siICAM1- B  | 1     | 0.233380491 | 0.234988383 | 0.348897327 |
| SD        |             | Day 0 | Day 1       | Day 3       | Day 6       |
|           | siCon       | 0     | 0.118016189 | 0.129361695 | 0.369819389 |
|           | siICAM1- SP | 0     | 0.022004158 | 0.021391474 | 0.063806164 |
|           | siICAM1- A  | 0     | 0.058214373 | 0.056390776 | 0.10308542  |
|           | siICAM1- B  | 0     | 0.05978584  | 0.024992461 | 0.1005748   |
| days      | 0           | 1     | 3           | 6           |             |

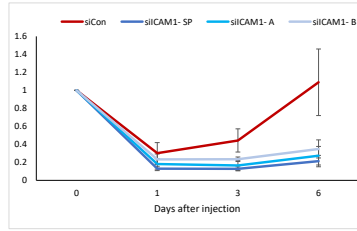

**Supp. Fig 9d** 231- ICAM1 siRNAs- BLI Lung Metastasis at Day 6

| siCon      | siICAM1- SP | siICAM1- A  | siICAM1- B  |
|------------|-------------|-------------|-------------|
| 3.28515508 | 0.387209671 | 0.889738502 | 0.854150999 |
| 0.99241669 | 0.431394871 | 1.258397699 | 1.081175488 |
| 2.44436251 | 0.523565956 | 0.646840117 | 0.599283825 |
| 1.82904763 | 0.33380341  | 0.278404088 | 0.984352664 |

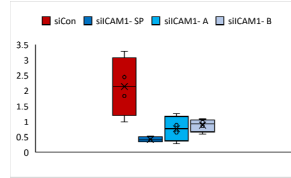

**Supp. Fig 9f** 231- ICAM1 siRNAs- Clustering

| Hours | siCon    | siICAM1-SP | siICAM1-A | siICAM1-B | siCon (Std Dev) | siICAM1-SP (Std Dev) | siICAM1-A (Std Dev) | siICAM1-B (Std Dev) |
|-------|----------|------------|-----------|-----------|-----------------|----------------------|---------------------|---------------------|
| 0     | 28479.34 | 10128.79   | 8120.58   | 5237.319  | 5338.923        | 1239.762             | 2139.196            | 1005.97             |
| 1     | 120476.9 | 23959.92   | 17660.74  | 14125.8   | 45675.49        | 2883.435             | 2685.807            | 1286.792            |
| 2     | 186698   | 43922.94   | 32943.6   | 30061.99  | 56731.23        | 7090.771             | 6661.626            | 8726.254            |
| 3     | 195829.7 | 48358.77   | 42210.7   | 46079.88  | 99569.02        | 7573.986             | 5471.761            | 9515.376            |
| 5     | 217522.4 | 47005.92   | 60725.69  | 50397.63  | 100966.2        | 6892.203             | 19631.04            | 4647.183            |
| 7     | 228050.4 | 45767.3    | 78230.59  | 60572.8   | 91955.88        | 7242.573             | 36757.72            | 14362.06            |
| 11    | 272357   | 51813.01   | 119921    | 72886.53  | 100221.6        | 7747.225             | 29761.48            | 28634.7             |

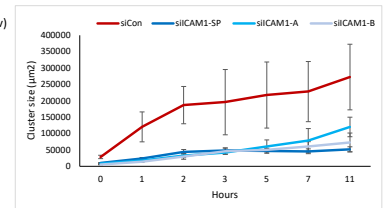

**Supp. Fig 9h** 231- ICAM1 siRNAs- Mammosphere

| siCon | siICAM1- SP | siICAM1- A | siICAM1- B |
|-------|-------------|------------|------------|
| 86    | 38          | 39         | 34         |
| 90    | 50          | 49         | 36         |
| 71    | 44          | 44         | 51         |

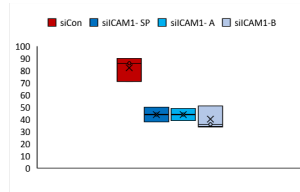

**Supp. Fig 9j** 231- ICAM1 siRNAs- Proliferation

| siCon | siICAM1- SP | siICAM1- A | siICAM1- B |
|-------|-------------|------------|------------|
| 60    | 23          | 27         | 21         |
| 52    | 27          | 23         | 18         |
| 70    | 23          | 20         | 32         |

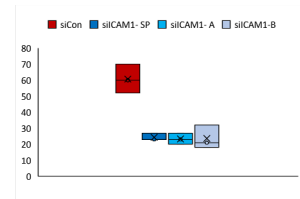

### Supplementary Figure 10 Source Data

Supp. Fig 10d 231 anti-ICAM1- BLI Lung Metastasis

| IgG  | anti-ICAM1 |
|------|------------|
| 1.24 | 0.66       |
| 1.00 | 0.77       |
| 0.83 | 0.57       |

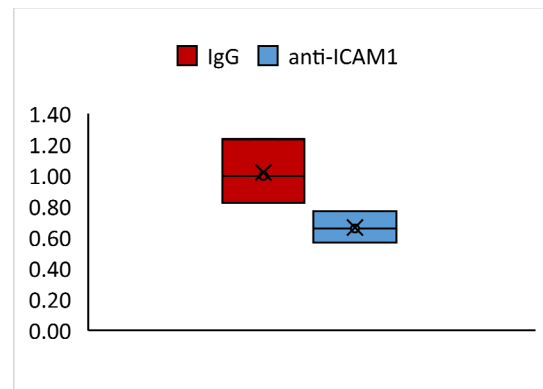

# Western Blots

Figure 2j

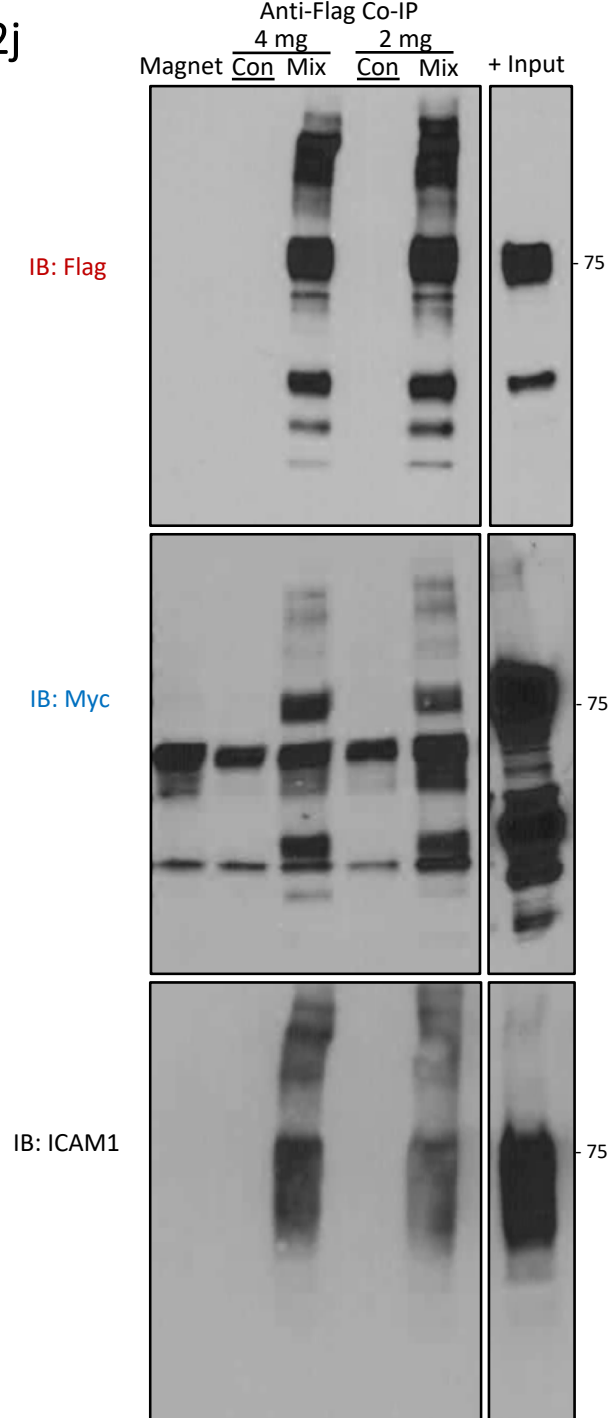

Figure 2l

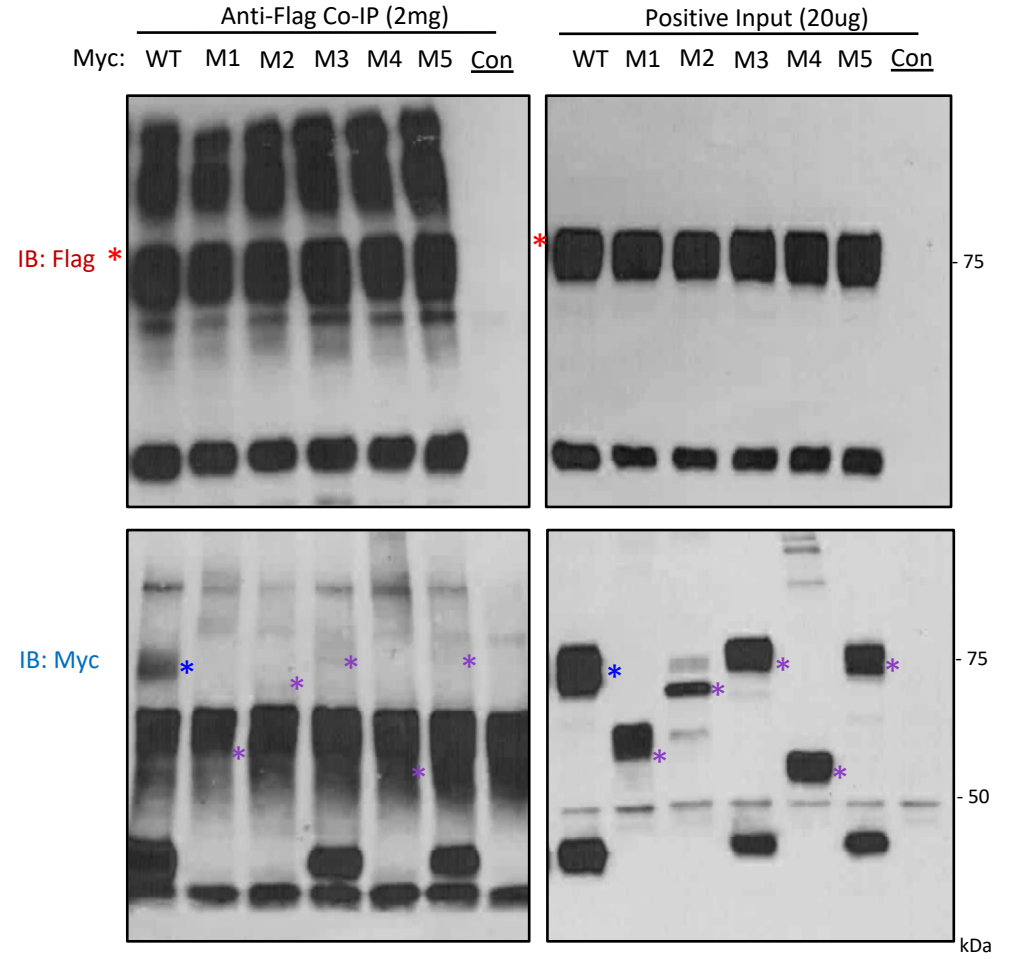

Figure 3c

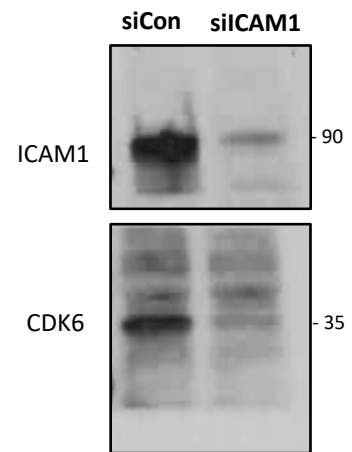

Suppl. Figure 1f

ICAM1 Expression in BC Cell Lines

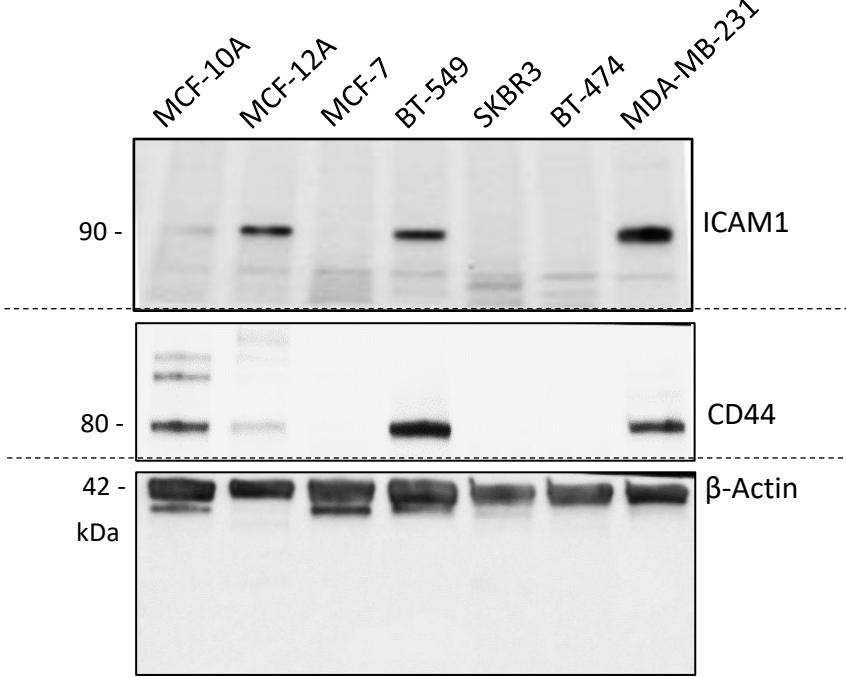

Suppl. Figure 3f

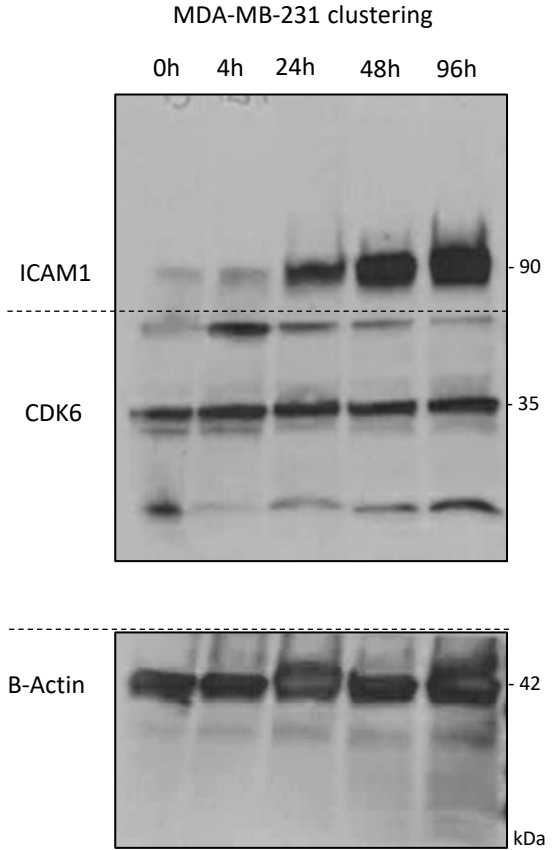

Suppl. Figure 4c

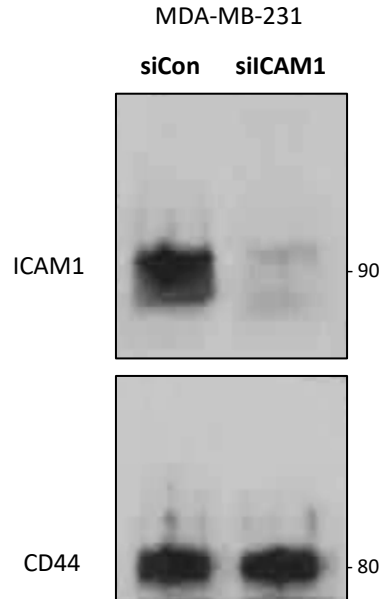

Suppl. Figure 5b

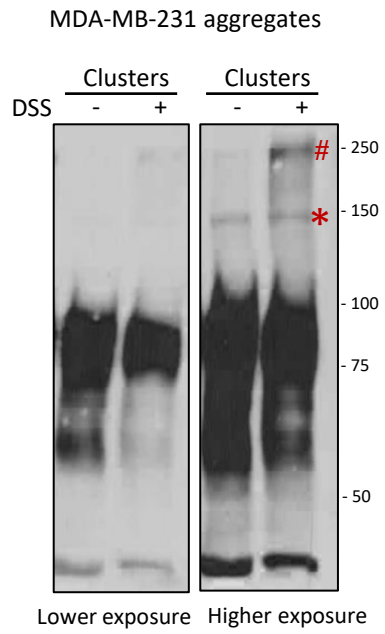



Suppl. Figure 6c,f

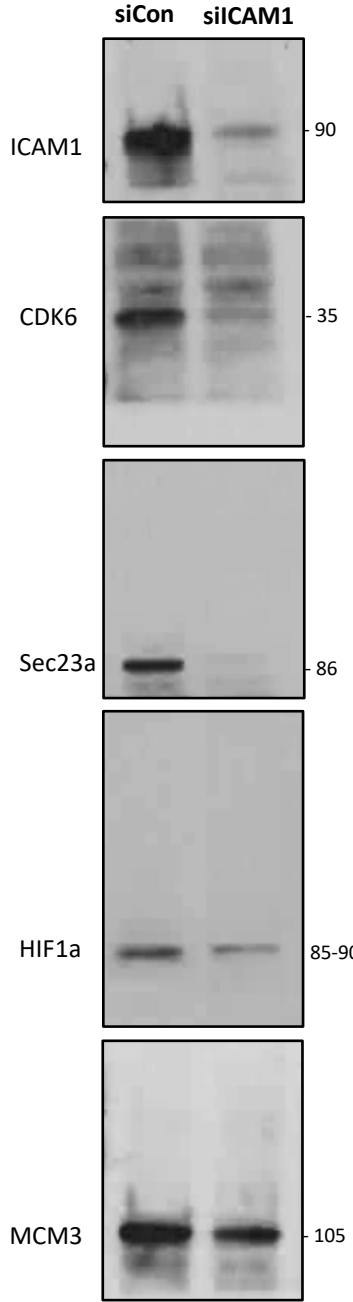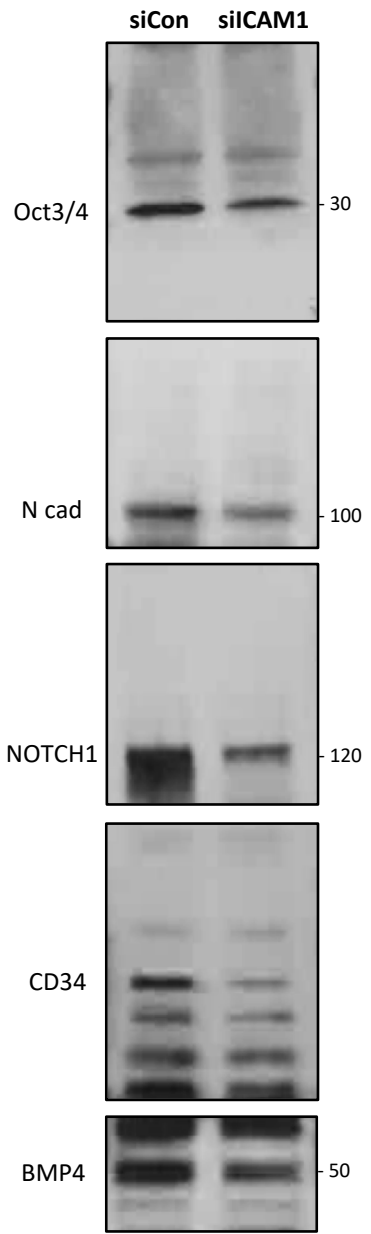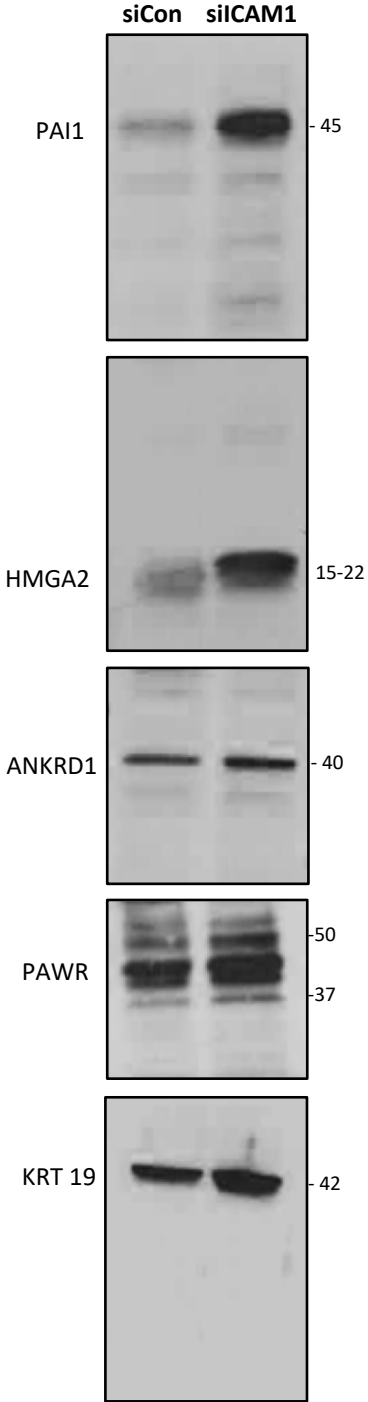

Suppl. Figure 7a

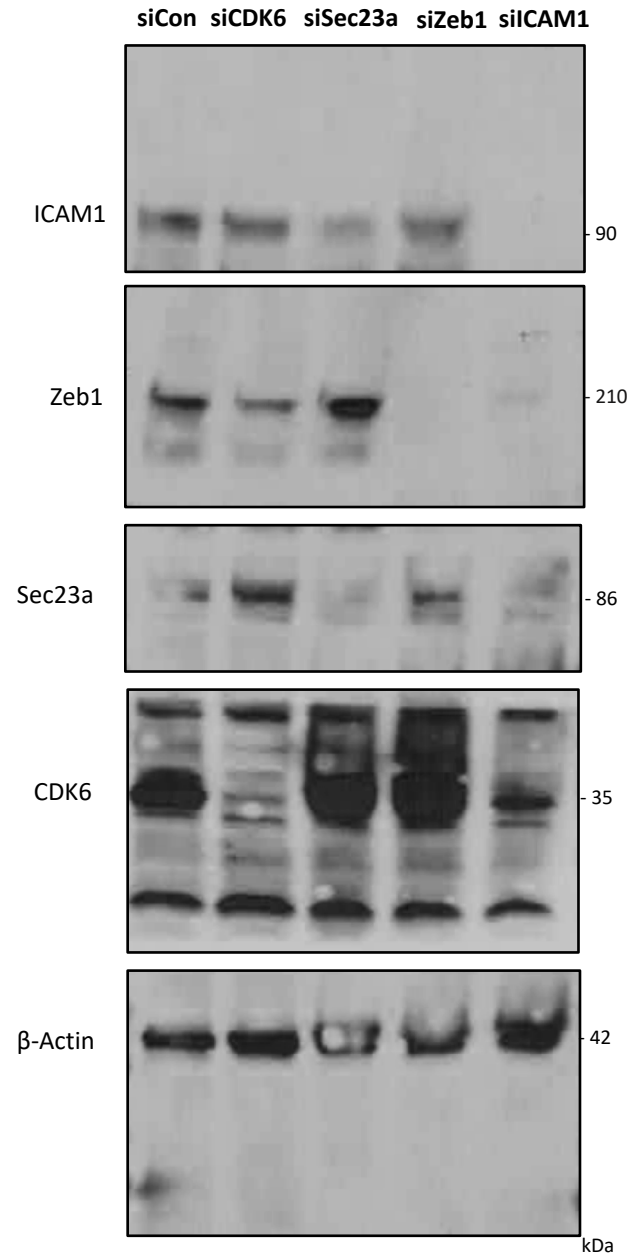

Suppl. Figure 8c

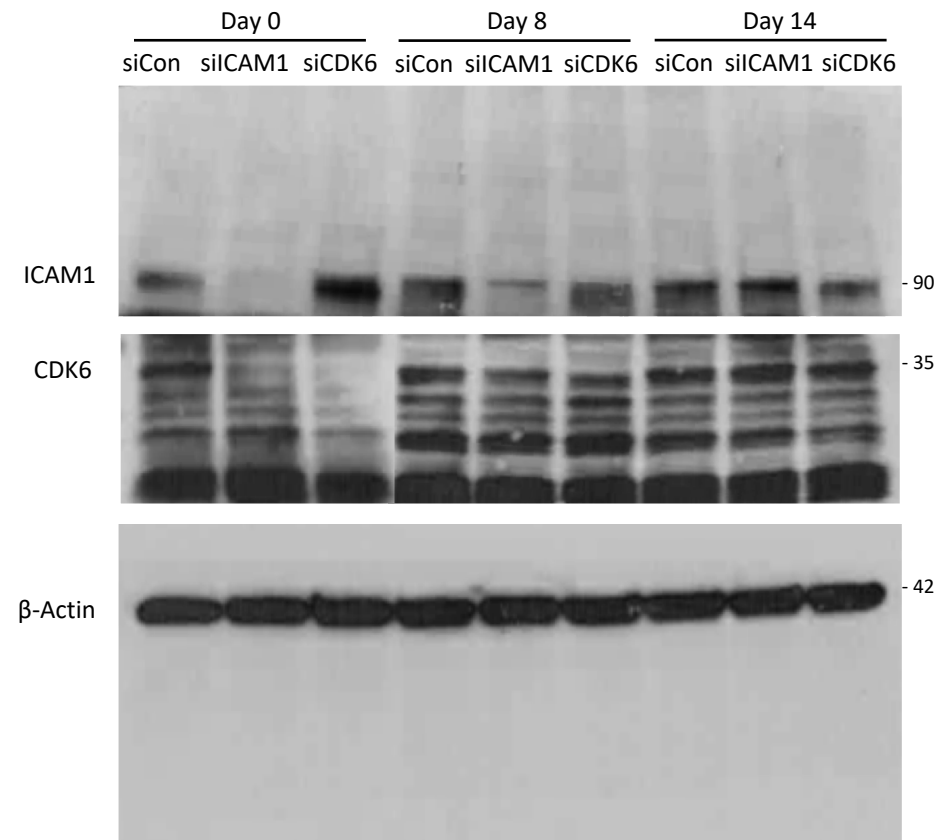

Suppl. Figure 9a

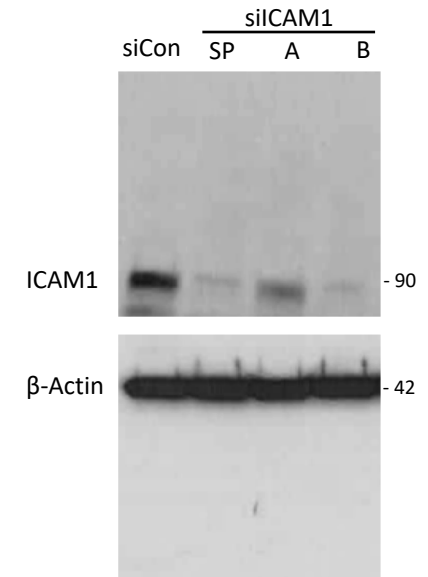

Supplement: 41467_2021_25189_MOESM3_ESM.pdf [file 41467_2021_25189_MOESM3_ESM.pdf]
