# Supplementary material for: ICAM1 initiates CTC cluster formation and trans-endothelial migration in lung metastasis of breast cancer
Source: Nat Commun. 2021 Aug 11;12:4867. doi: 10.1038/s41467-021-25189-z (PMC8358026; doi:10.1038/s41467-021-25189-z)
Supplement: Supplementary file 1 — Supplementary Information [file 41467_2021_25189_MOESM1_ESM.pdf]

# ICAM1 initiates CTC cluster formation and trans-endothelial migration in lung metastasis of breast cancer

Rokana Taftaf<sup>1,2\*</sup>, Xia Liu<sup>1,3\*</sup>, Salendra Singh<sup>4</sup>, Yuzhi Jia<sup>1</sup>, Nurmaa K. Dashzeveg<sup>1</sup>, Andrew D. Hoffmann<sup>1</sup>, Lamiaa K. M. A. El-Shennawy<sup>1</sup>, Erika K. Ramos<sup>1,2</sup>, Valery Adorno-Cruz<sup>1</sup>, Emma J. Schuster<sup>1,2</sup>, David Scholten<sup>1,2</sup>, Dhvani Patel<sup>1</sup>, Youbin Zhang<sup>5</sup>, Andrew A. Davis<sup>5,6</sup>, Carolina Reduzzi<sup>5</sup>, Yue Cao<sup>7</sup>, Paolo D'Amico<sup>5</sup>, Yang Shen<sup>7</sup>, Massimo Cristofanilli<sup>5,8</sup>, William A Muller<sup>8,9</sup>, Vinay Varadan<sup>4#</sup>, Huiping Liu<sup>1,5,8#</sup>

<sup>1</sup>Department of Pharmacology, <sup>2</sup>Driskill Graduate Program in Life Sciences, Northwestern University Feinberg School of Medicine, Chicago, IL, USA. <sup>3</sup>Department of Toxicology and Cancer Biology, University of Kentucky, KY, USA. <sup>4</sup>Case Comprehensive Cancer Center, Case Western Reserve University, Cleveland, OH, USA. <sup>5</sup>Department of Medicine, the Division of Hematology and Oncology, Northwestern University Feinberg School of Medicine, Chicago, IL, USA. <sup>6</sup>Division of Hematology and Oncology, Department of Medicine, Washington University in St. Louis, St. Louis, Missouri. <sup>7</sup>Department of Electrical and Computer Engineering, TEES-AgriLife Center for Bioinformatics and Genomic Systems Engineering, Texas A&M University, College Station, TX 77843. <sup>8</sup>Lurie Comprehensive Cancer Center, Northwestern University Feinberg School of Medicine, Chicago, IL, USA. <sup>9</sup>Department of Pathology, Northwestern University Feinberg School of Medicine, Chicago, IL, USA.

\* These authors contributed equally. #These authors jointly supervised this work.

**Corresponding author:** Huiping Liu, MD, PhD, Northwestern University, 303 E Superior St, Chicago, IL 60611. Email: [huiping.liu@northwestern.edu](mailto:huiping.liu@northwestern.edu).

**Keywords:** ICAM1, CTC clusters, TNBC, metastasis

## Supplementary Information and Source Data

1. Supplementary Figures 1-10
2. Supplementary Tables 1-4

# Supplementary Fig. 1

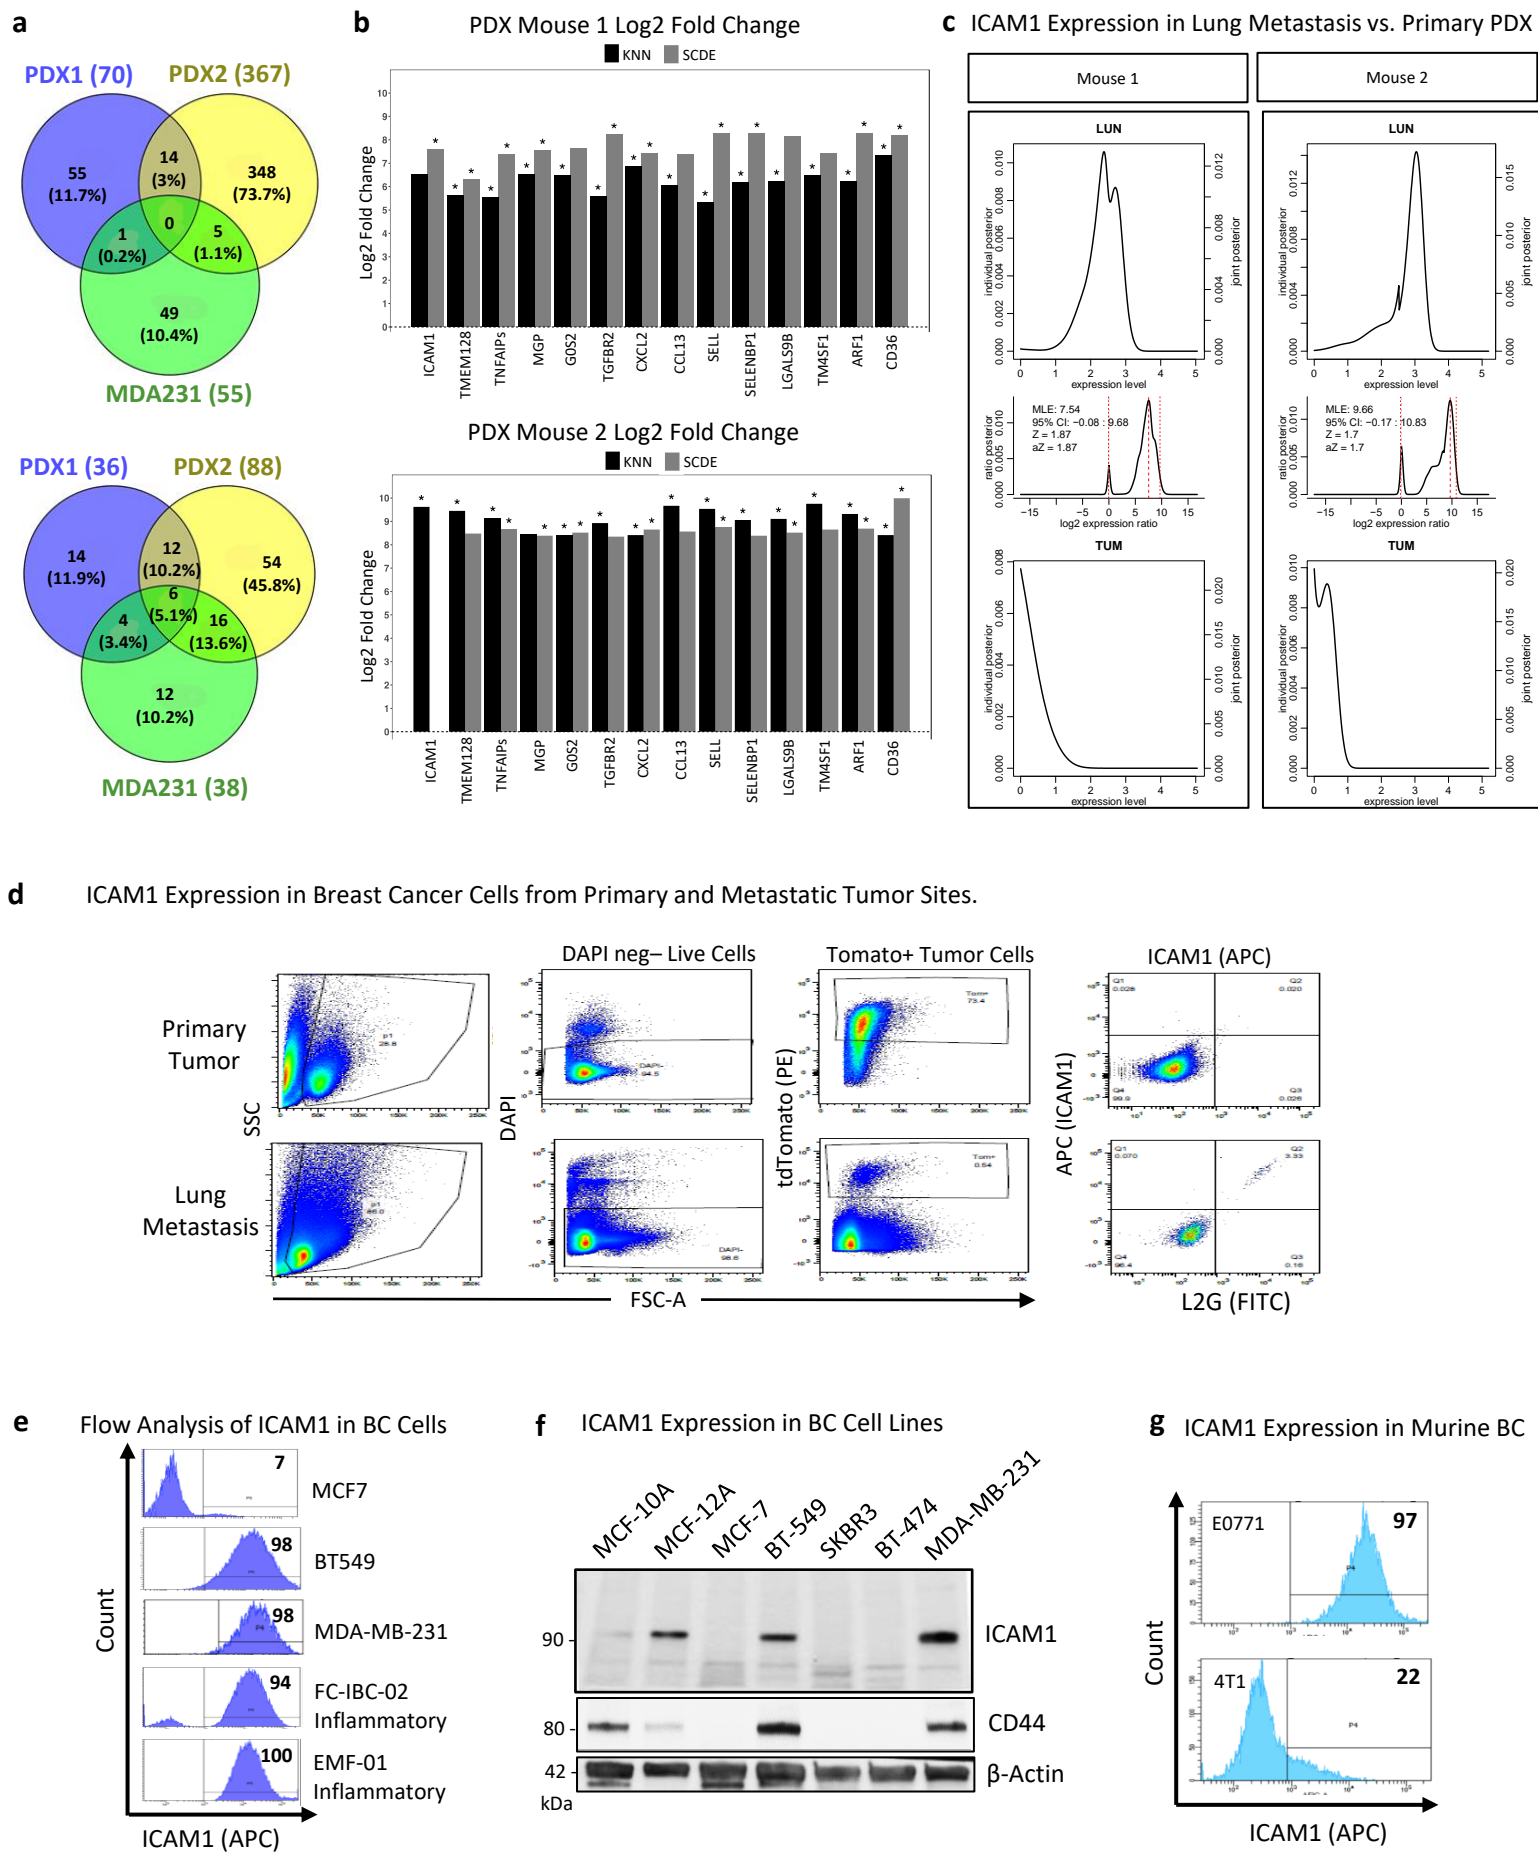

**Supplementary Fig. 1. ICAM1 is highly expressed in TNBC (related to Fig 1).**

- a. Venn diagrams of the significantly differentially expressed genes in 3 paired comparisons between lung metastases and primary tumors for 3 mice (TN PDX in mice 1 and 2, MDA-MB-231 tumor in mouse 3), identified by KNN (top) and SCDE (bottom) platform analyses of single-cell RNA sequencing data.
- b. Differential expression levels of the significantly differentially expressed genes in lung metastases compared to primary tumor cells in PDX mouse 1 and mouse 2. Bars denote log2 fold-change estimated by the SCDE (grey) and KNN (black) models. Stars denote statistically significant fold-change ( $*P < 0.05$ , an FDR Corrected 2-tailed p-value from the SCDE pipeline).
- c. ICAM1 expression in the lung metastatic cells vs. primary tumor cells of two PDX-bearing mice by single-cell RNA sequencing.
- d. Representative flow cytometry gating of PDX L2T+ primary tumor and lung metastasis.
- e. ICAM1 expression levels in human TNBC cell lines (top four panels) and MCF7 cells by flow cytometry.
- f. ICAM1 and CD44 expression in different breast cancer subtypes by western blotting. N = 1 independent experiment.
- g. ICAM1 expression levels in murine TNBC cell lines by flow cytometry.

Supplementary Fig. 2.

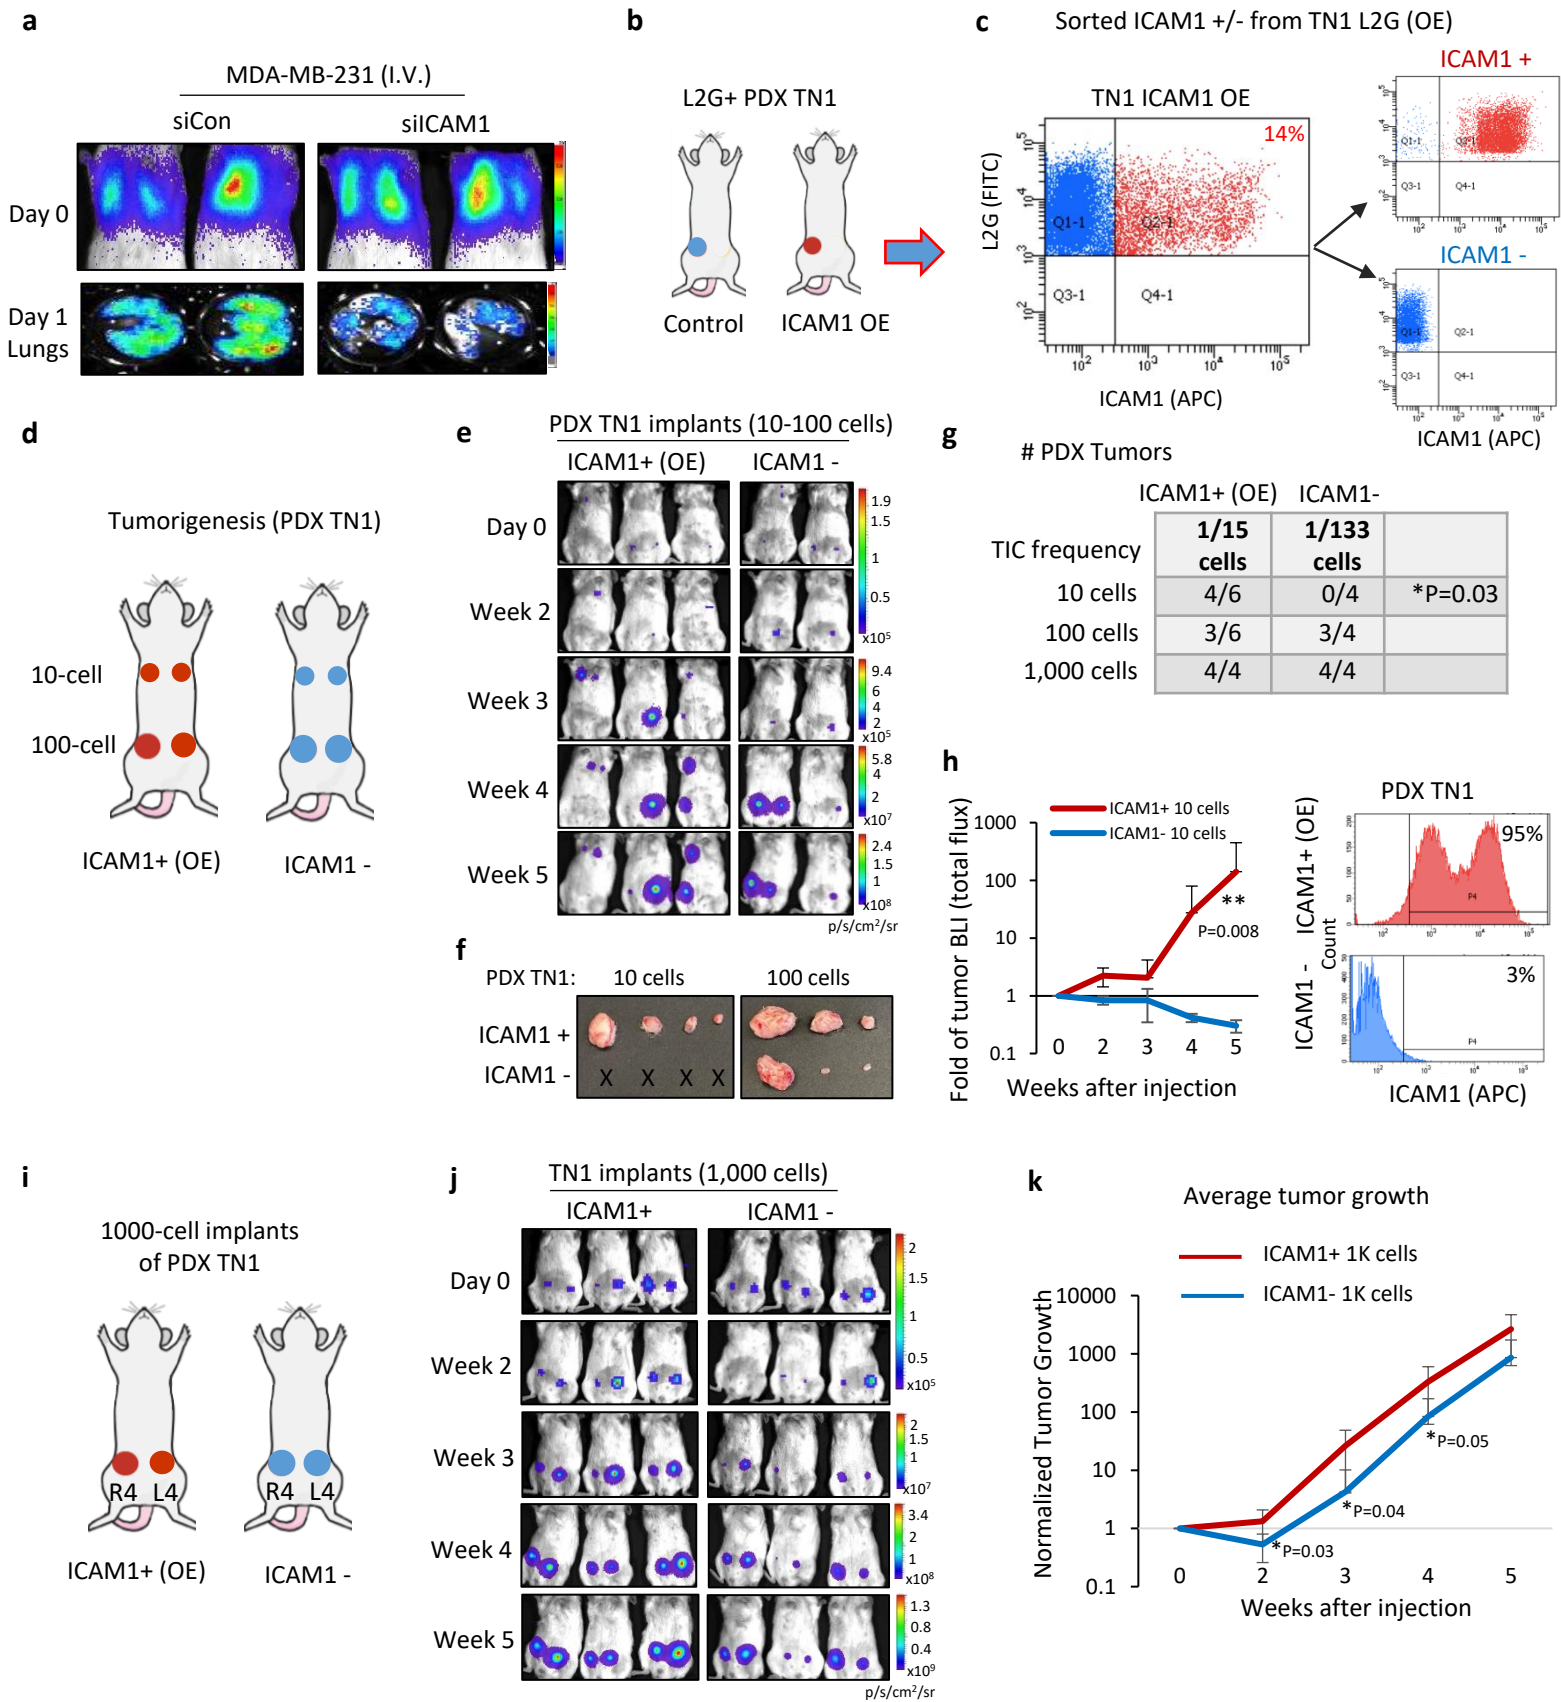

**Supplementary Fig. 2. ICAM1 promotes breast cancer cell growth and metastasis (related to Fig 1).**

- a. Representative BLI images of mice injected with siCon and siICAM1-transfected MDA-MB-231 cells via tail vein on day 0 and 1 (dissected lungs *ex vivo*).
- b. Schematic of orthotopic implants of TN1 PDX cells control (blue) and ICAM1 overexpression (OE; red) at 4<sup>th</sup> mammary fat pads of NSG mice.
- c. Flow sorting of ICAM1<sup>+</sup> and ICAM1<sup>-</sup> cells from ICAM1-overexpressing (OE) L2G<sup>+</sup> TN1 PDXs.
- d-k.** Tumorigenic assays with sorted ICAM1<sup>+</sup> and ICAM1<sup>-</sup> cells in serial dilutions of 10-100 cells (d-h) and 1000 cells (i-k) per injection at the 2<sup>nd</sup> and 4<sup>th</sup> mammary fat pads, BLI images of PDX TN1 tumors from day 0 (D0) to 5 weeks (Wk5) post implantation (e and j), table of the tumors grown from each dilution (g), and normalized tumor growth curves of tumor cells (h and k) (N= 4-6 injections per cell group). (h) also confirms the ICAM1 expression levels in the tumors grown from sorted ICAM1<sup>+</sup> and ICAM1<sup>-</sup> cells. Data are presented as mean values +/- SD. Error bars represent SD values. (h) Two-sided *t* test \*\*P=0.008. (k) Two-sided *t* test \*P=0.03; \*P=0.04; \*P=0.05)

## Supplementary Fig. 3

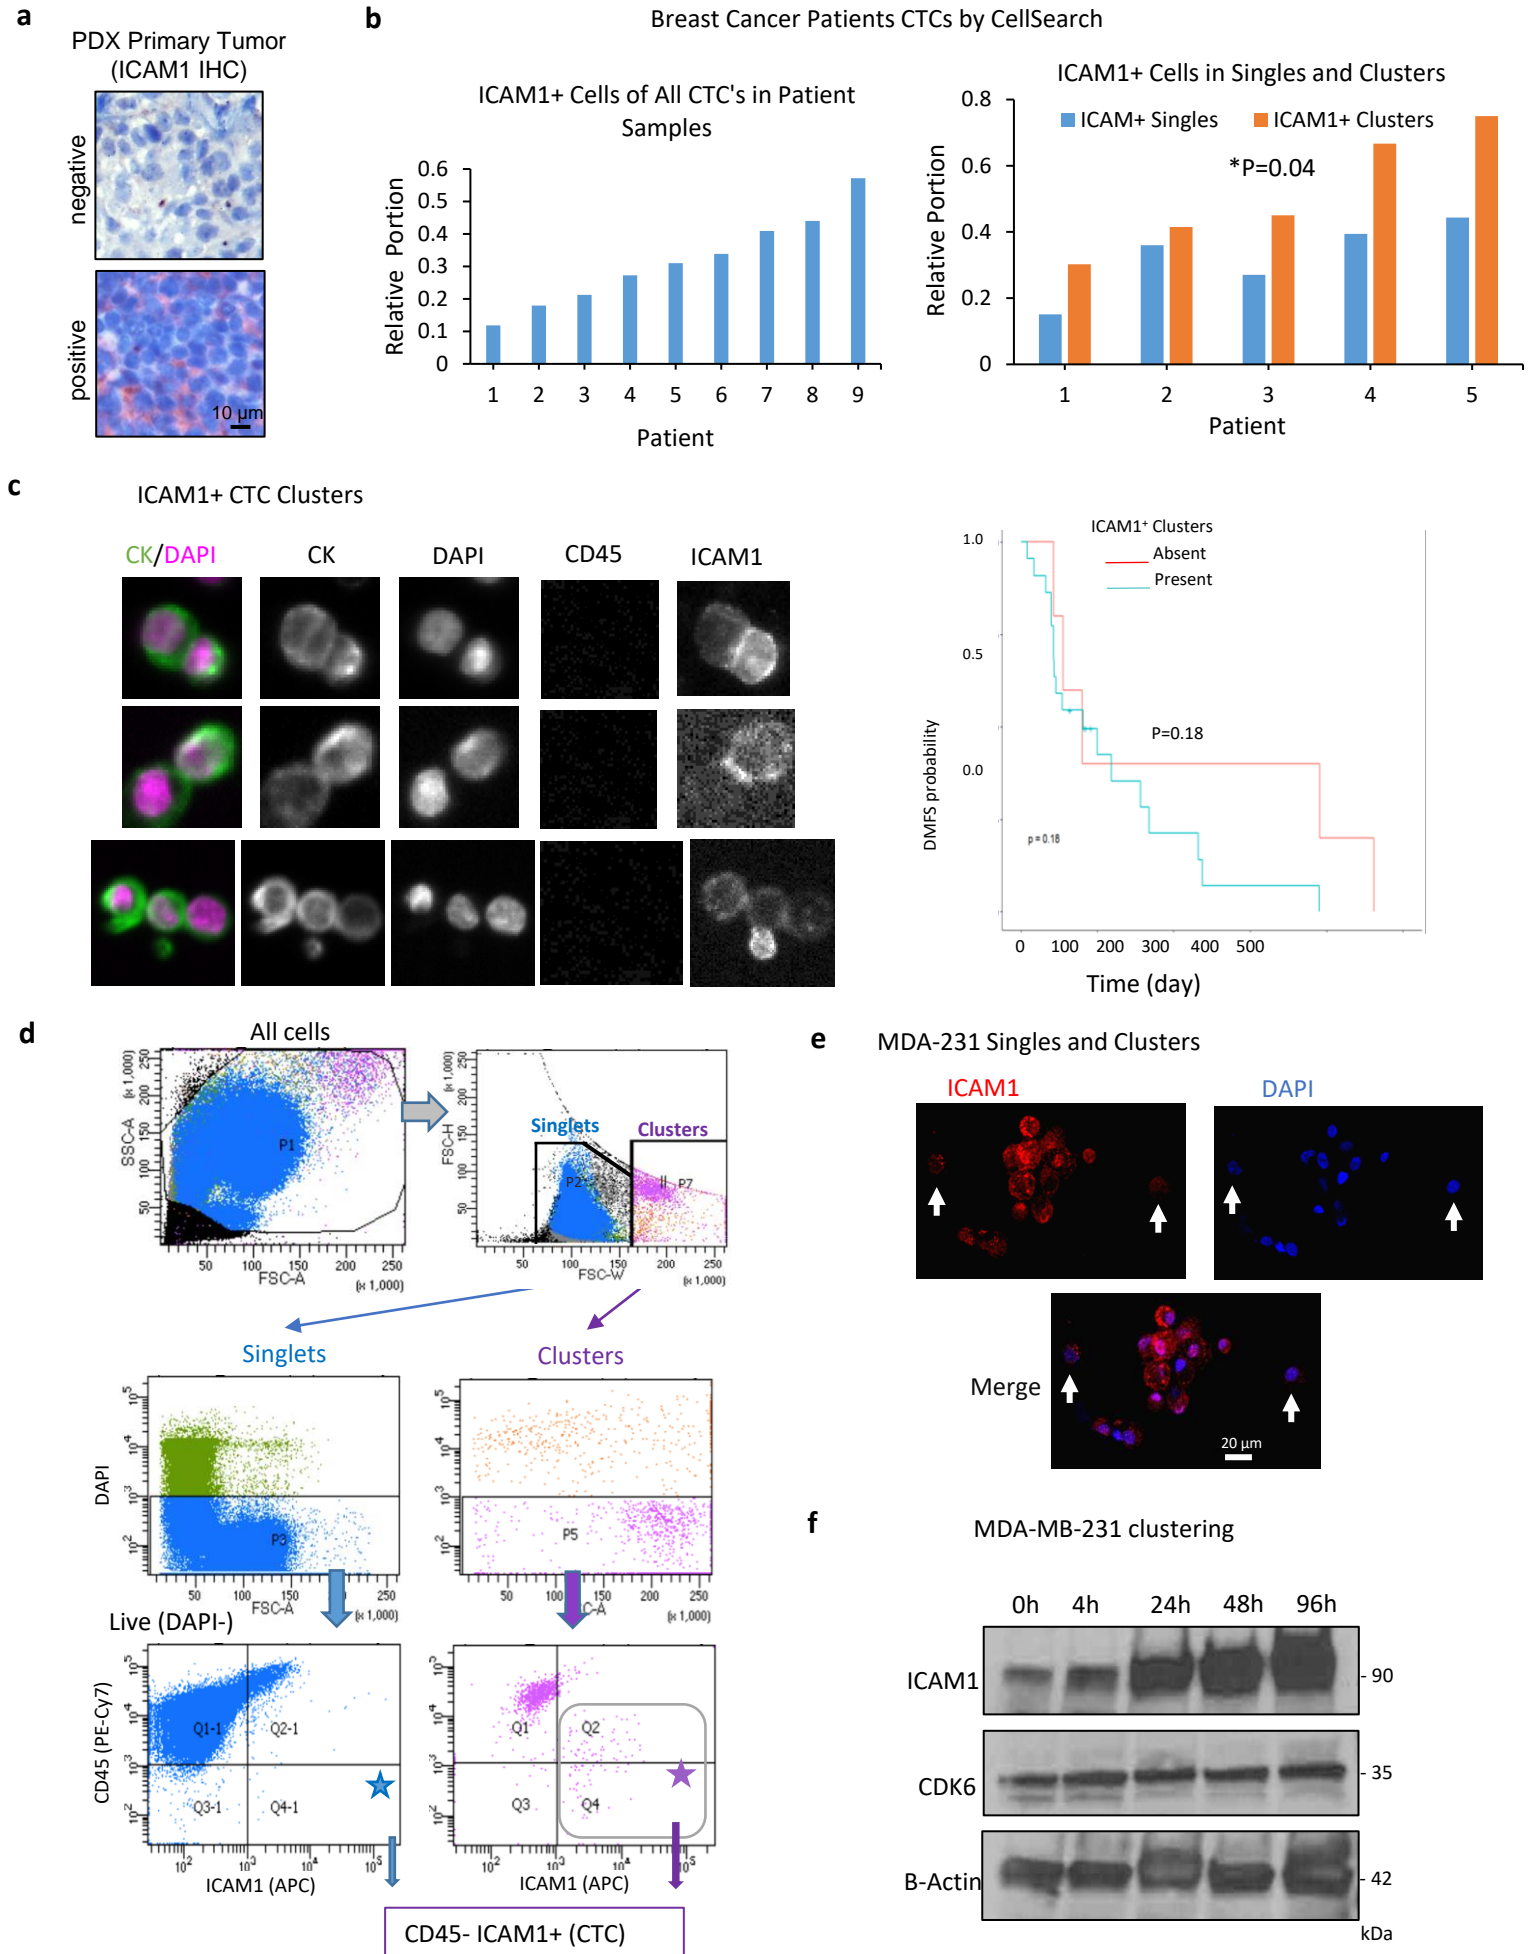

**Supplementary Fig. 3. ICAM1 is highly expressed in CTC clusters (related to Fig 2).**

- a. Negative and positive controls of ICAM1 IHC staining in PDX primary tumors. Minimal 3 sets of the images have shown similar patterns.
- b. CellSearch-based ICAM1 expression in CTCs (left panel) and in CTC clusters versus singles (right panel) in breast cancer patients, one-sided *t* test \**P* = 0.04.
- c. Left panel: CellSearch-analyzed representative images of ICAM1<sup>+</sup> CTC clusters, green=cytokeratin, purple = DAPI and gray = ICAM1, CD45 negative staining. Right panel: KM-plot in DMFS of breast cancer patients with detectable (present) or absent ICAM1<sup>+</sup> CTC clusters analyzed in Fig 2C (N = 50) with a log rank *p* = 0.18.
- d. Representative flow cytometry gating of human CD45<sup>-</sup> ICAM1<sup>+</sup> CTCs. Side scatters were used to gate singlets and clusters (left two panels) followed by live cell gating (DAPI-) and CD45-ICAM1<sup>+</sup> CTCs for both singlets (Q4-1 blue star\*) and clusters (rectangle gate purple star\*).
- e. ICAM1 immunofluorescence of MDA-MB-231 cells during 24 h aggregation assay. Aggregated MDA-MB-231 cells show high expression of ICAM1 at the cytoplasmic membrane. In contrast, the single cells (white arrows) display low levels of ICAM1. Red=ICAM1, blue=DAPI staining. N= 2 independent experiments.
- f. Immunoblots of ICAM1 and CDK6 protein levels in clustering MDA-MB-231 cells over time. N = 1 independent experiment.

# Supplementary Fig. 4

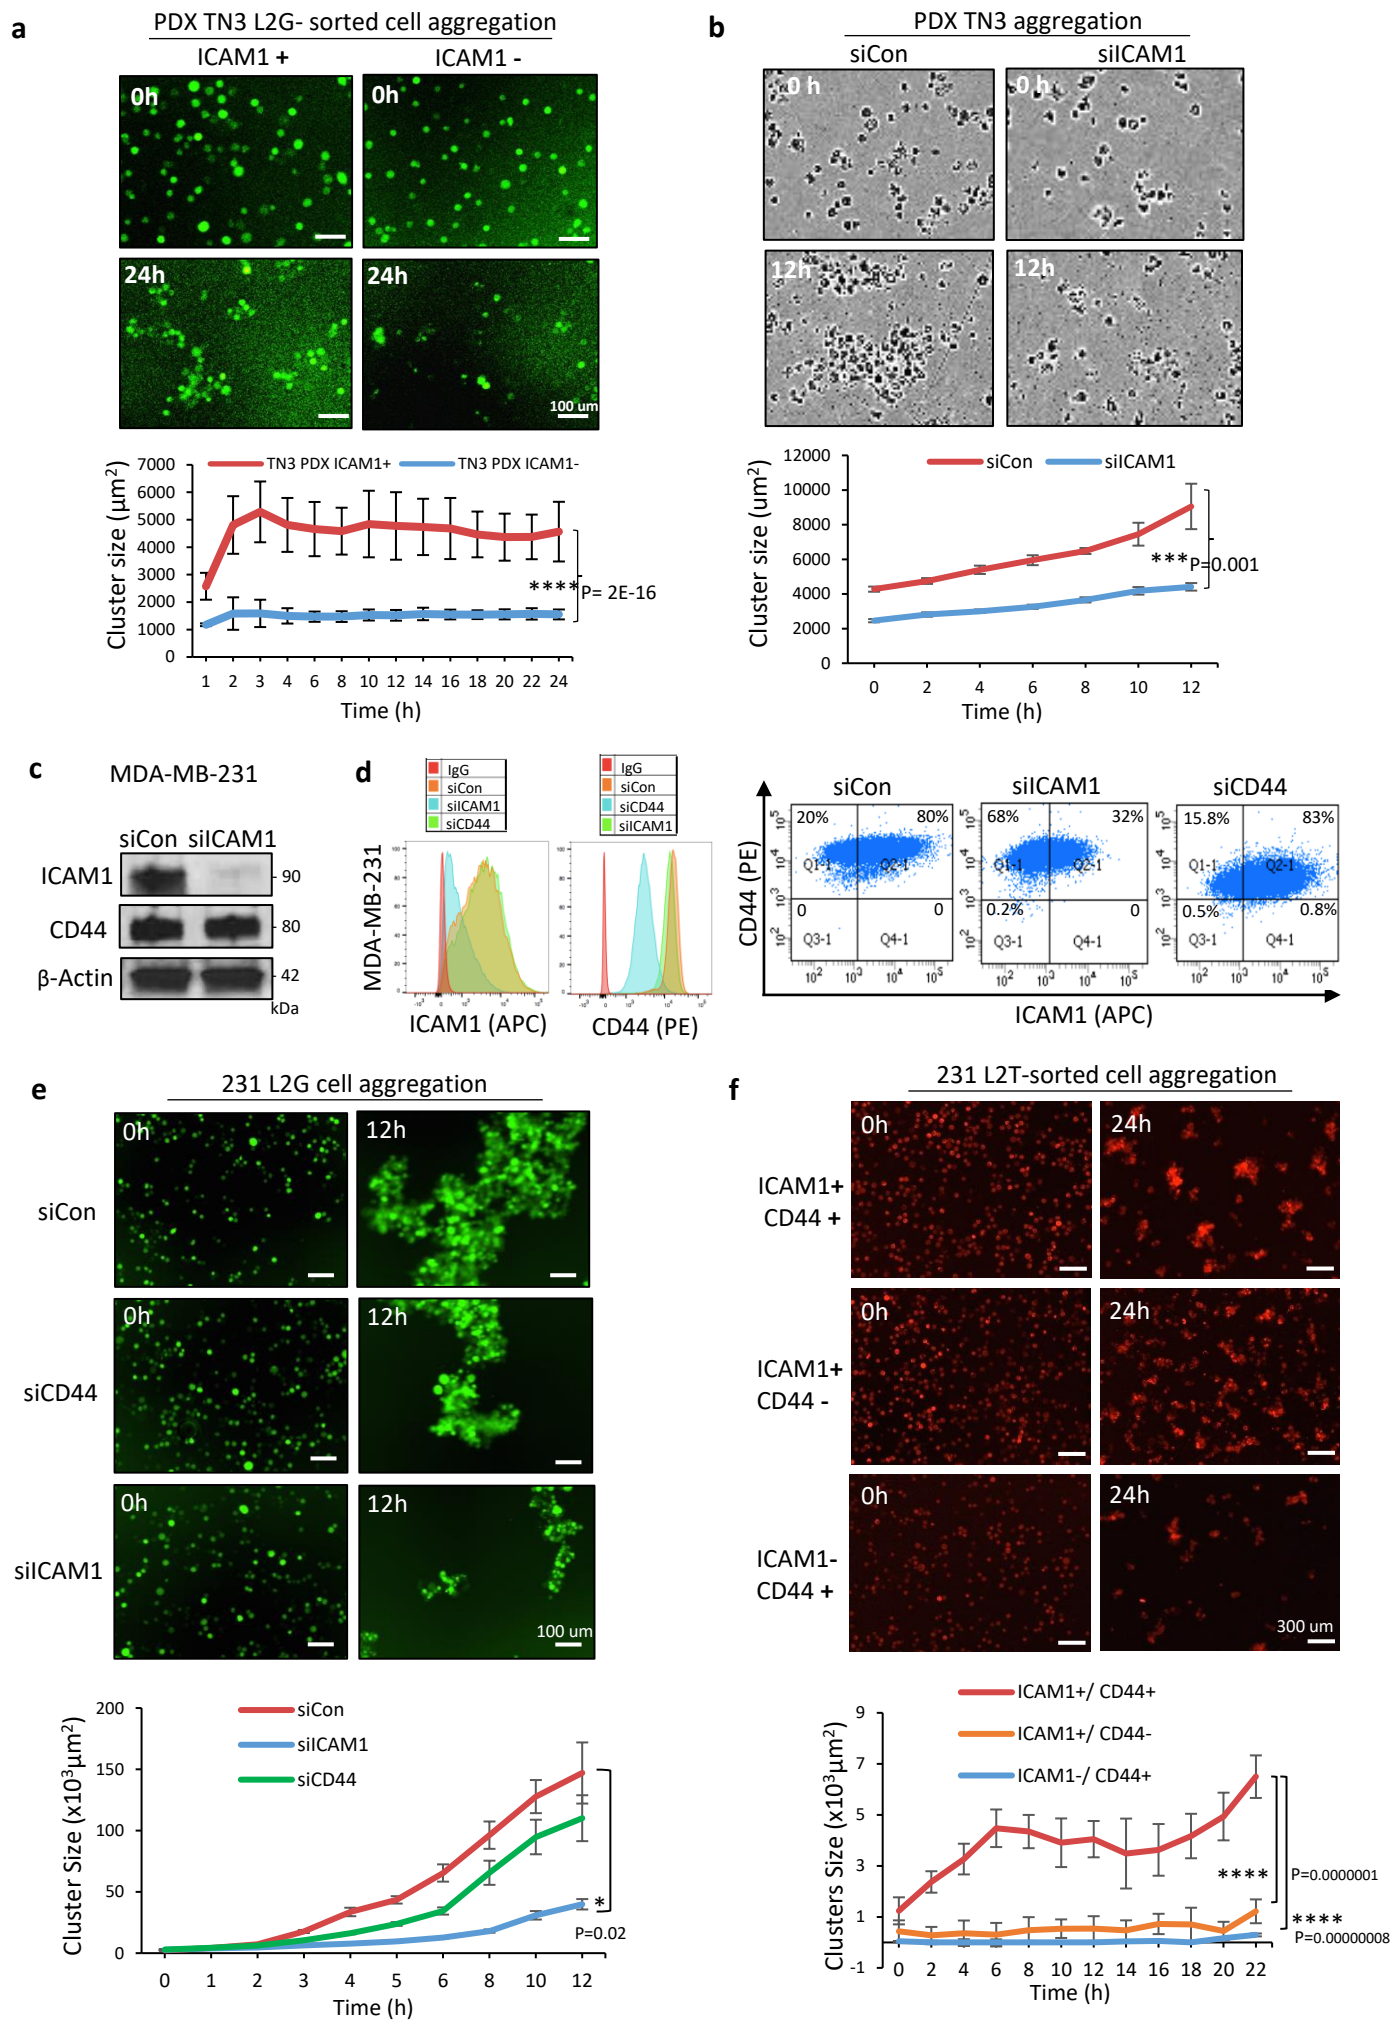

**Supplementary Fig. 4. ICAM1 mediates tumor cell clustering independent of CD44 (related to Fig 2).**

- a. Images (top panels) and quantified cluster sizes (bottom panel) of ICAM1<sup>+</sup> and ICAM1<sup>-</sup> tumor cells sorted from the PDX TN3 model, and loosely attached for aggregation assays on collagen I-coated plates *ex vivo* (n=8 biological replicates. Data are presented as mean values +/- SD. Error bars represent SD values. Two-sided *t* test \*\*\*\*P = 2E-16).
- b. Images (top panels) and cluster size (bottom panel) of PDX TN3 cells transfected with siICAM1 and control, captured by time-lapse IncuCyte live cell imaging microscopy (n=10 biological replicates. Data are presented as mean values +/- SEM. Error bars represent SE values. Two-sided *t* test \*\*\*P = 0.001).
- c. Immunoblots showing reduced ICAM1 expression and stable CD44 protein levels upon *ICAM1* knockdown in MDA-MB-231 cells. N = 2 independent experiments.
- d. Flow cytometry histograms (left two panels) and dot plots (right three panels) of ICAM1 and CD44 expression levels in MDA-MB-231 cells transfected with siICAM1 and siCD44, respectively.
- e. Time-lapse aggregation images at 0 and 12 hours (top panels) and cluster size (bottom panel) of L2G MDA-MB-231 cells transfected with siRNA controls (siCon), siCD44, and siICAM1. ICAM1 knockdown had more profound effects than CD44 knockdown on inhibiting the cluster formation (n = 10 biological replicates, Data are presented as mean values +/- SD. Error bars represent SD values. Two-sided *t* test \*P=0.02. N = 2 independent experiments)
- f. Time-lapse aggregation images at 0 and 24 hours (top panels) and cluster size (bottom panel) of MDA-MB-231 cells sorted based on double positive or single positive cells with ICAM1 and CD44 expression, showing the most efficient cluster formation of double positive cells. Top row, sorted ICAM1<sup>+</sup>CD44<sup>+</sup>double positive cells; middle row, ICAM1<sup>+</sup>CD44<sup>-</sup>; bottom row, ICAM1<sup>-</sup>CD44<sup>+</sup> cells. (n= 4 biological replicates, Data are presented as mean values +/- SD. Error bars represent SD values. Two-sided *t* test \*\*\*\*P=0.0000001; \*\*\*\*P=0.00000008. N = 1 independent experiment).

Supplementary Fig. 5

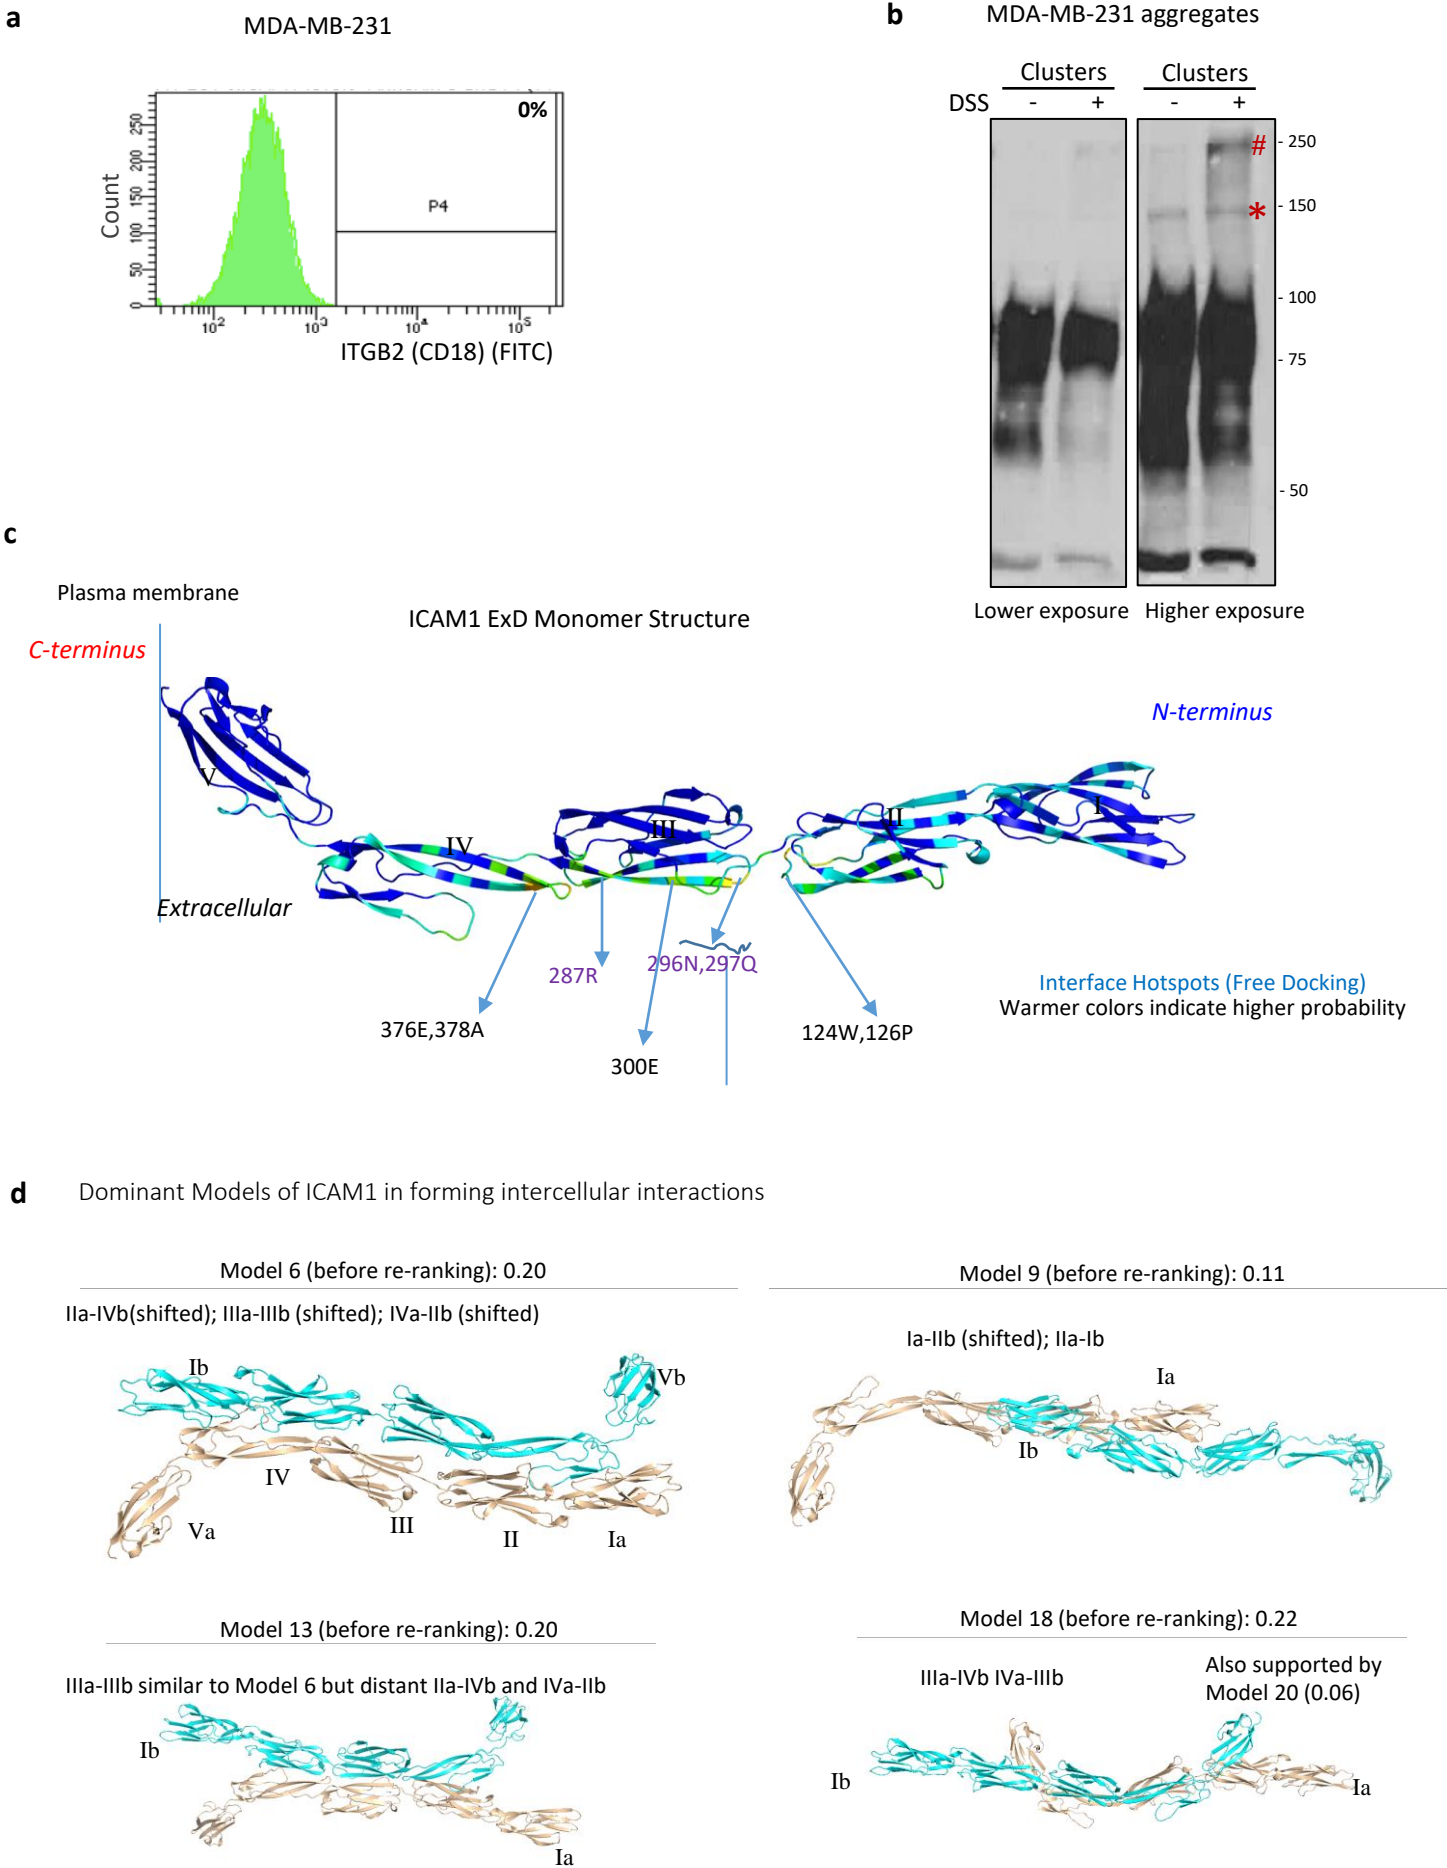

**Supplementary Fig. 5. ICAM1 mediates tumor cell clustering through ICAM1-ICAM1 homophilic binding (related to Fig. 2).**

- a. Flow cytometry of integrin beta-2 (CD18), a beta subunit for LFA-1 and MAC-1, which is not expressed in MDA-MB-231 cells.
- b. ICAM1 dimers ~140 kD (\*) and possible tetramers (~280 kD) (#) after treatment with the crosslinking agent DSS (left and right panels: lower and higher exposure time of film processing, respectively). N= 2 independent experiments.
- c. ICAM1 extracellular domain (ExD) monomer structure with predicted interface hotspots for ICAM1 homodimerization (warmer colors indicate higher probability for binding).
- d. Top structural models of ICAM1 homodimerization labeled with conditional probabilities (among 24 total models) and interacting domains.

Supplementary Fig. 6

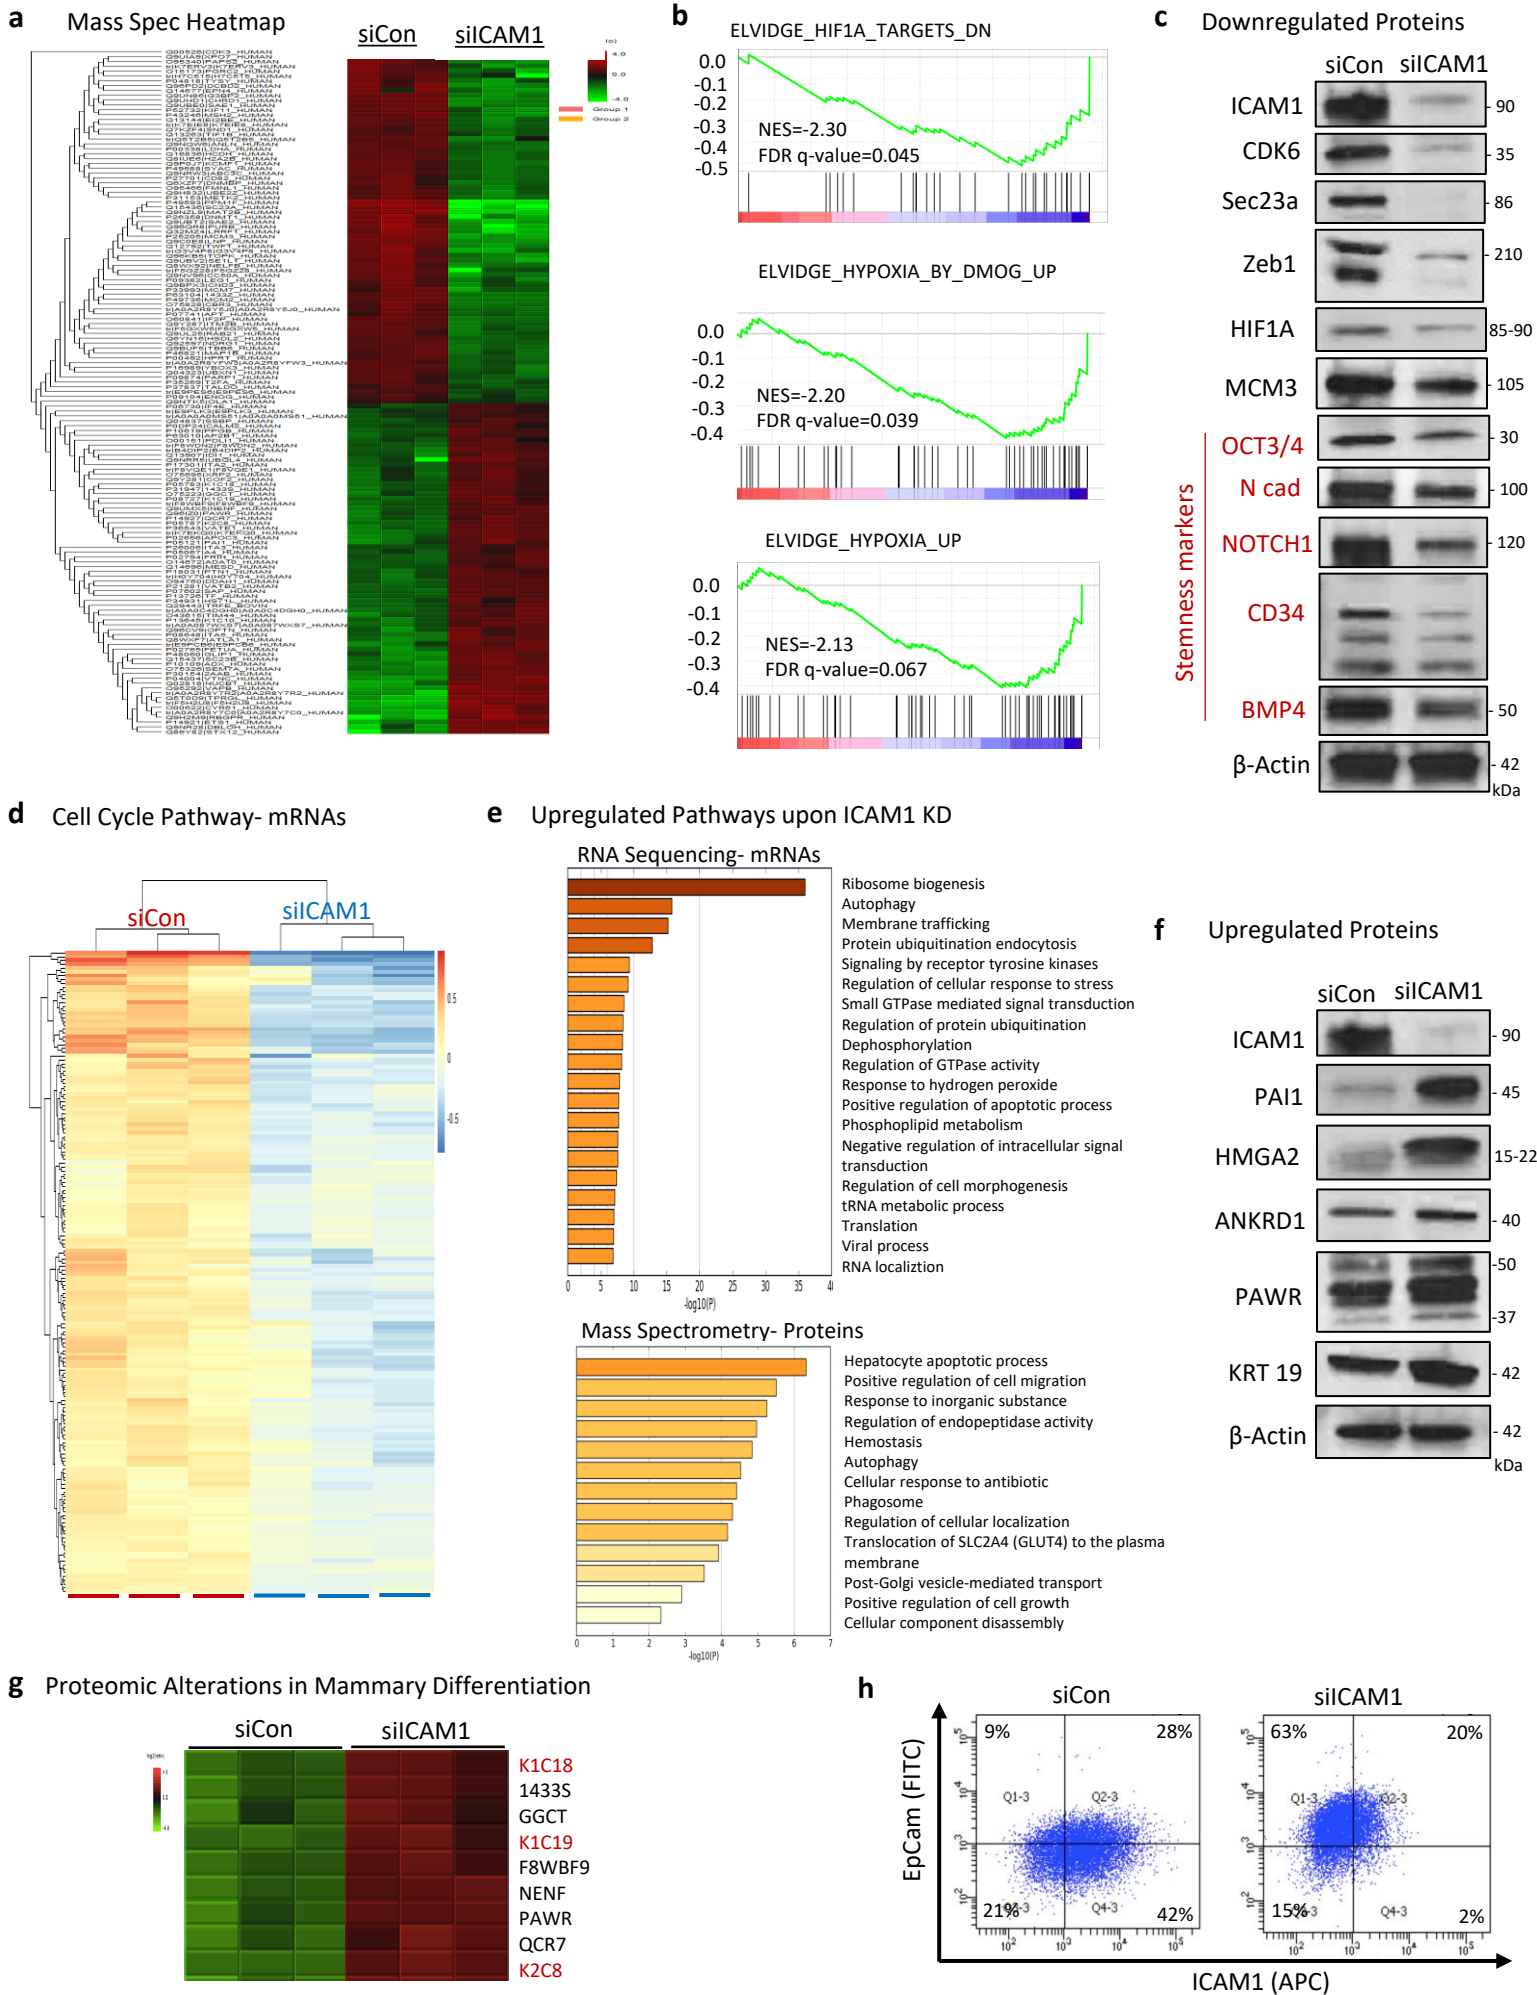

**Supplementary Fig. 6. ICAM1 downstream targets and signaling pathways (related to Fig. 3).**

- a. Heatmap of 76 differentially expressed proteins (>1.5-fold change and two-sided t test  $p < 0.05$ ) upon *ICAM1* knockdown in MDA-MB-231 cells.
- b. GSEA of the gene sets for hypoxia and HIF1 targets enriched among the down-regulated genes in MDA-MB-231 *ICAM1* knockdown cells in comparison to siRNA control, identified by RNA sequencing.
- c. Immunoblots of ICAM1 targets showing down-regulated proteins and the decrease expression of multiple stemness markers in *ICAM1* knockdown cells.  $\beta$ -Actin serves as a loading control. N= 1-3 independent experiments (3 times for essential targets such as CDK6, Sec23a and Zeb1).
- d. Altered cell cycle genes upon *ICAM1* knockdown in MDA-MB-231 cells.
- e. Up-regulated pathways upon *ICAM1* knockdown in MDA-MB-231 cells, analyzed by RNA sequencing (top) and mass spectrometry analysis (bottom).
- f. Immunoblots of ICAM1 targets showing up-regulated proteins in *ICAM1* knockdown cells.  $\beta$ -Actin serves as a loading control. N= 1 independent experiment.
- g. Heatmap of proteomic alterations in mammary epithelial differentiation markers (siCon vs. siICAM1) for mass spectrometry data from three independent experiments.
- h. Flow analyses of down-regulated ICAM1 and up-regulated EpCAM levels upon *ICAM1* knockdown.

Supplementary Fig. 7

a Knockdown of ICAM1 Targets in MDA-MB-231

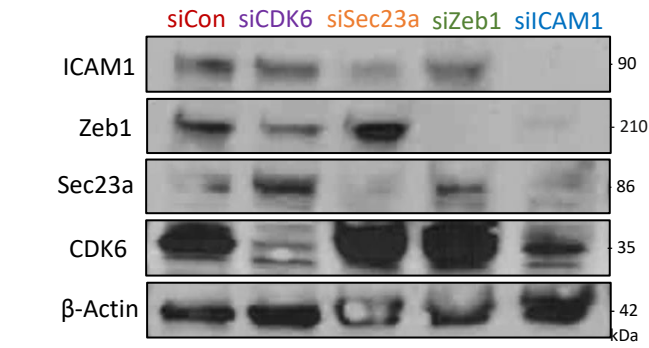

b MDA-MB-231 Mammosphere Formation

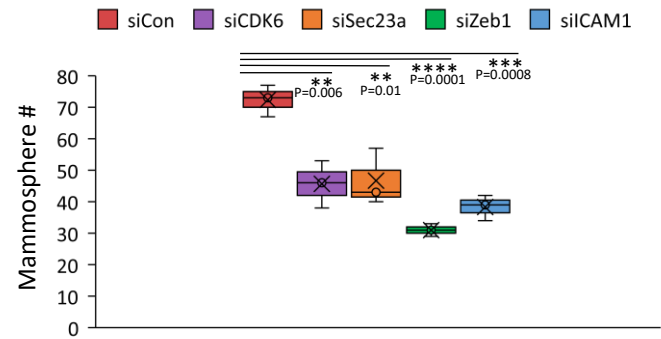

c MDA-MB-231 Migration

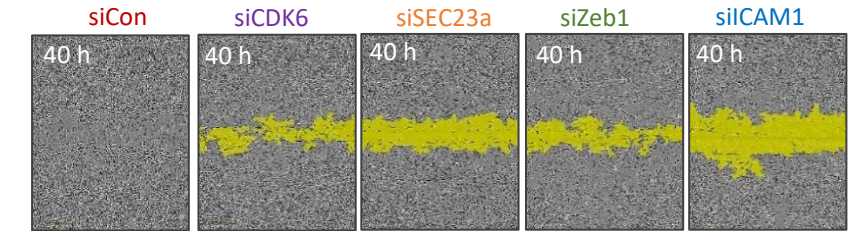

d

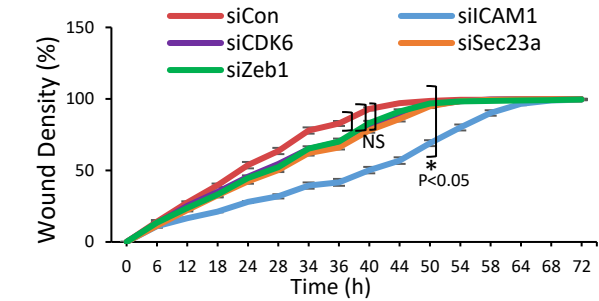

e MDA-MB-231 Clustering

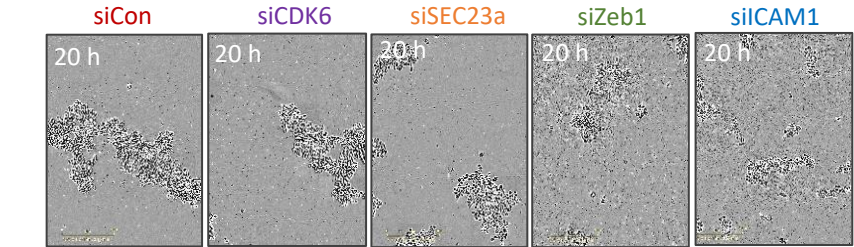

f

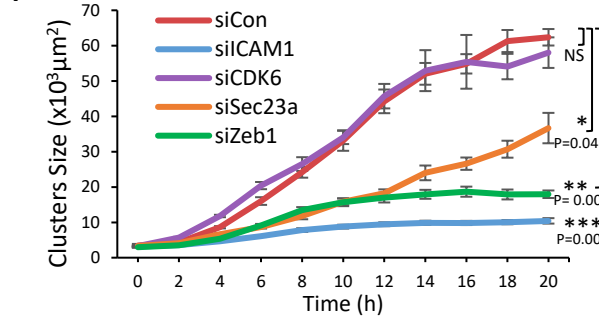

g Lung Colonization of MDA-MB-231 (I.V.)

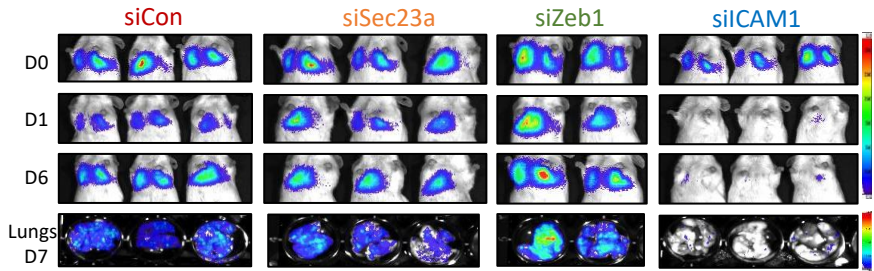

h

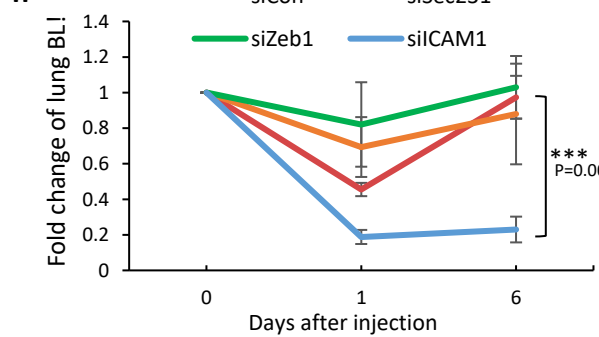

i Normalized Lung Metastasis at Day 7

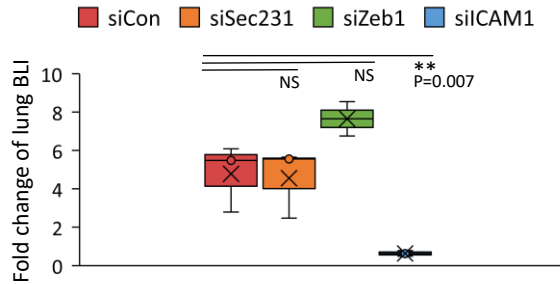

j MDA-MB-231 Cell Cycle Analysis

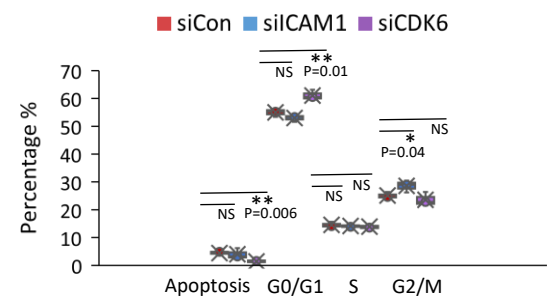

k TCGA-BRCA ICAM1 CDK6 Scatter Plot. R:0.442. N:898. P<0.0001

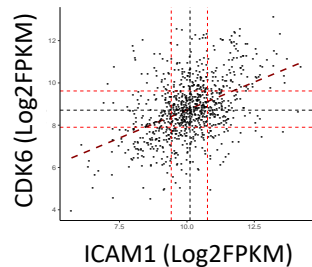

**Supplementary Fig. 7. ICAM1 downstream targets partially mimic ICAM1 function (related to Fig 3).**

- a.** Immunoblot validation of the knockdown efficiency of ICAM1, CDK6, Sec23a, and Zeb1 targets in MDA-MB-231. N= 1 independent experiment.
- b-f.** Effect of knockdown of ICAM1 target genes CDK6, Sec23a, and ZEB1 on tumor mammosphere formation (b), tumor migration (c-d), and tumor cell clustering (e-f), partially mimicking *ICAM1* knockdown (Mammosphere n= 3 biological replicates. Migration n= 10 biological replicates. Clustering n= 10 biological replicates. (b) The boxes range from the first to third quartile with x in a box indicating mean value and whisker lines extending to outliers (minimum and maximum). (d,f) Data are presented as mean values +/- SD. Error bars represent SD values. Two-sided *t* test values shown in b-f. N= 1-4 independent experiments (4 times for essential targets such as ICAM1 and CDK6).
- g-i.** Representative images (g) and normalized analyses (h-i) of BLI signals of mice injected with MDA-MB-231 cells, which were transfected with siCon, siICAM1, siSec23a, and siZeb1 (n= 3 mice for siCon, siICAM1, siSec23a. n= 2 mice for siZeb1. (h) Data are presented as mean values +/- SD. Error bars represent SD values. Two-sided *t* test \*\*\*P=0.0003. (i) two-sided *t* test \*\*P=0.007, NS=not significant. N= 1-4 independent experiments (4 times for essential targets such as ICAM1 and CDK6). (i) The boxes range from the first to third quartile with x in a box indicating mean value and whisker lines extending to outliers (minimum and maximum).
- j.** Quantification of cell cycle phase percentages using propidium iodide in MDA-MB-231 cells treated with siICAM1 and siCDK6, measured by flow cytometry (n=3 biological replicates. Two-sided *t* test \*\*P=0.006; \*\*P=0.01; \*P=0.04. NS= not significant. N= 3 independent experiments). The boxes range from the first to third quartile with x in a box indicating mean value and whisker lines extending to outliers (minimum and maximum).
- k.** Scatter plot showing positive correlation (Pearson R=0.442; P < 0.0001) between ICAM1 and CDK6 expression in the TCGA breast cancer cohort (N = 898), including all PAM50 subtypes except Normal-Like.

# Supplementary Fig. 8

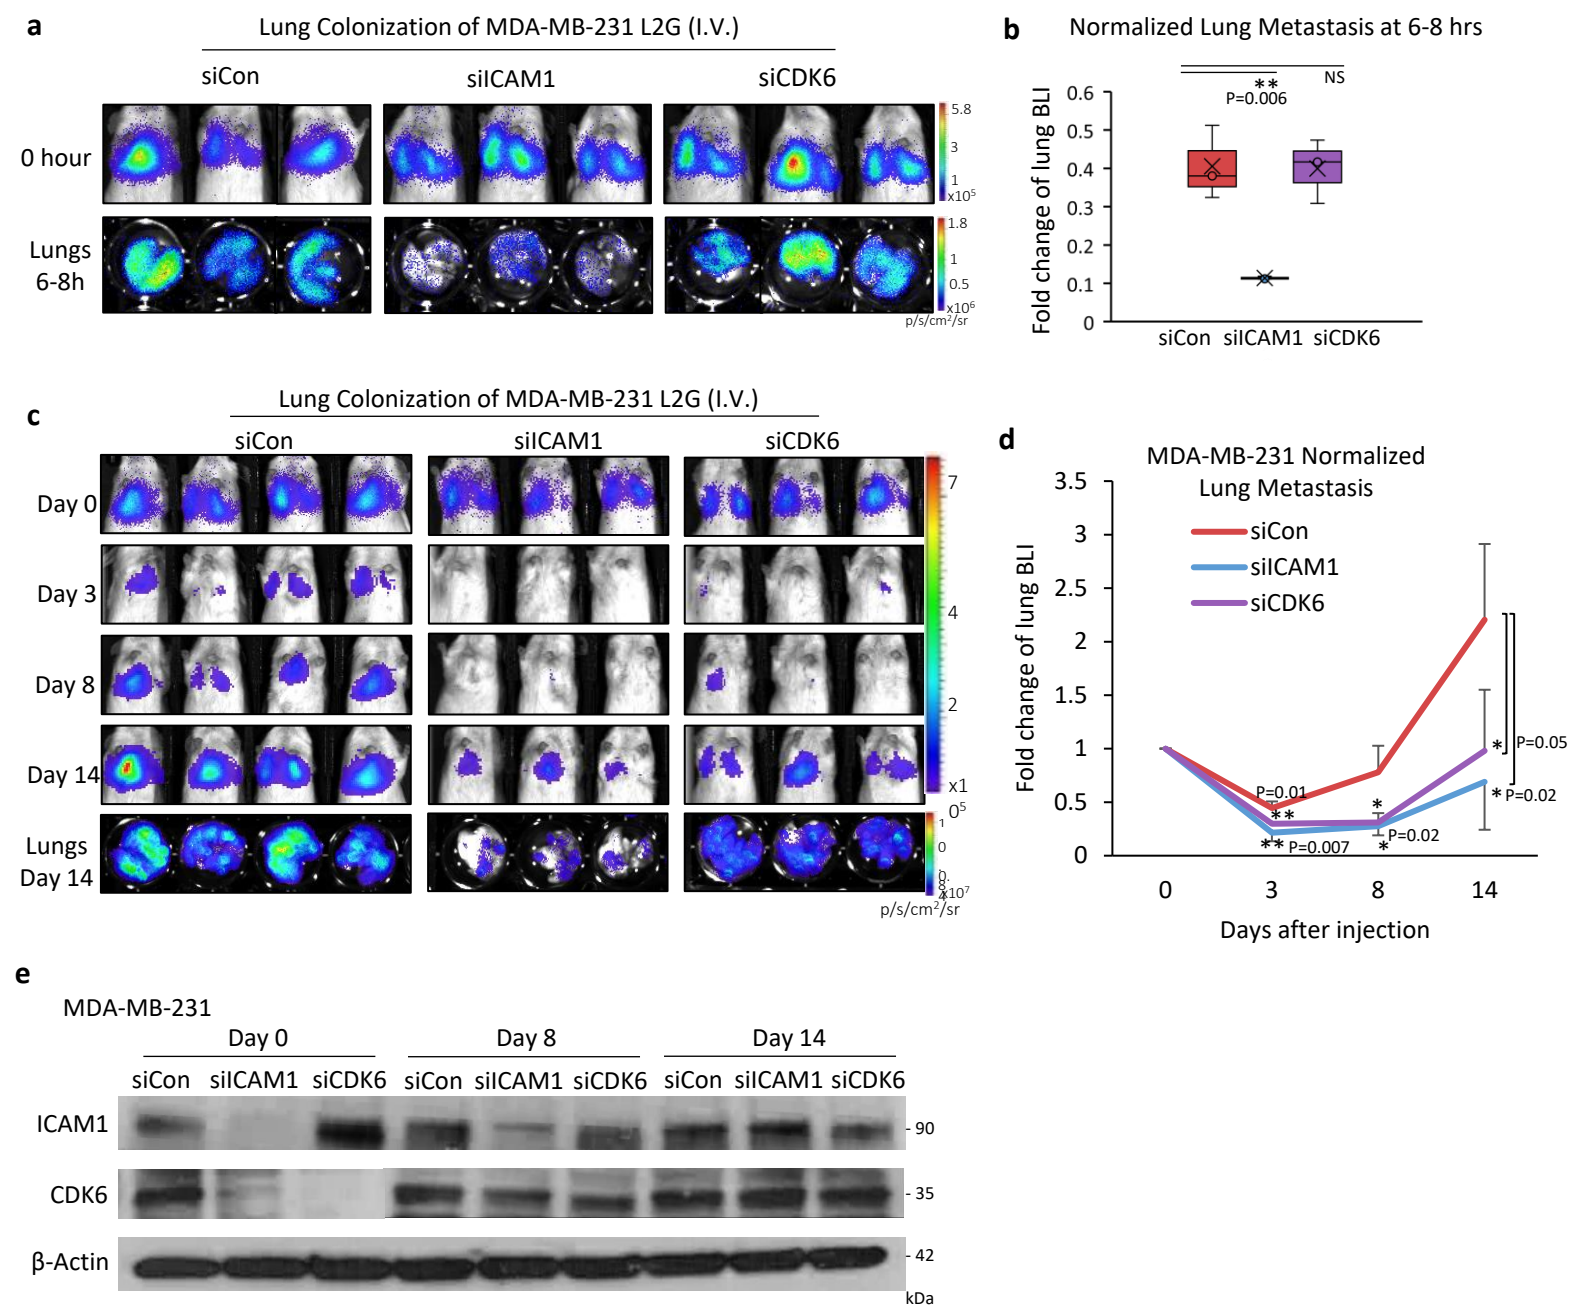

**Supplementary Fig. 8. Short-term and long-term effects of gene knockdowns (siICAM1 and siCDK6) on vascular extravasation, metastatic seeding and lung colonization**

**a-b.** Representative images (a) and quantitative data of BLI signals (b) of mice injected with siCon, siICAM1, and siCDK6-transfected MDA-MB-231 cells via tail vein. Lungs were collected 6-8 hours after injection (n=3 mice per cell group. Two-sided *t* test \*\*P=0.006. NS= not significant. N = 4 independent experiments). The boxes range from the first to third quartile with x in a box indicating mean value and whisker lines extending to outliers (minimum and maximum).

**c-d.** Representative images (d) and quantitative data (e) of BLI signals of mice injected with siCon, siICAM1, and siCDK6-transfected MDA-MB-231 cells via tail vein. Lungs were collected two weeks after injection (n=4 mice for siCon. n= 3 mice for siICAM1, siCDK6. Data are presented as mean values +/- SD. Error bars represent SD values. Two-sided *t* test values are shown. N = 4 independent experiments).

**e.** Immunoblot validation of the knockdown efficiency of ICAM1 and CDK6 in MDA-MB-231 and their protein level expression over time. N= 1 independent experiment.

# Supplementary Fig. 9

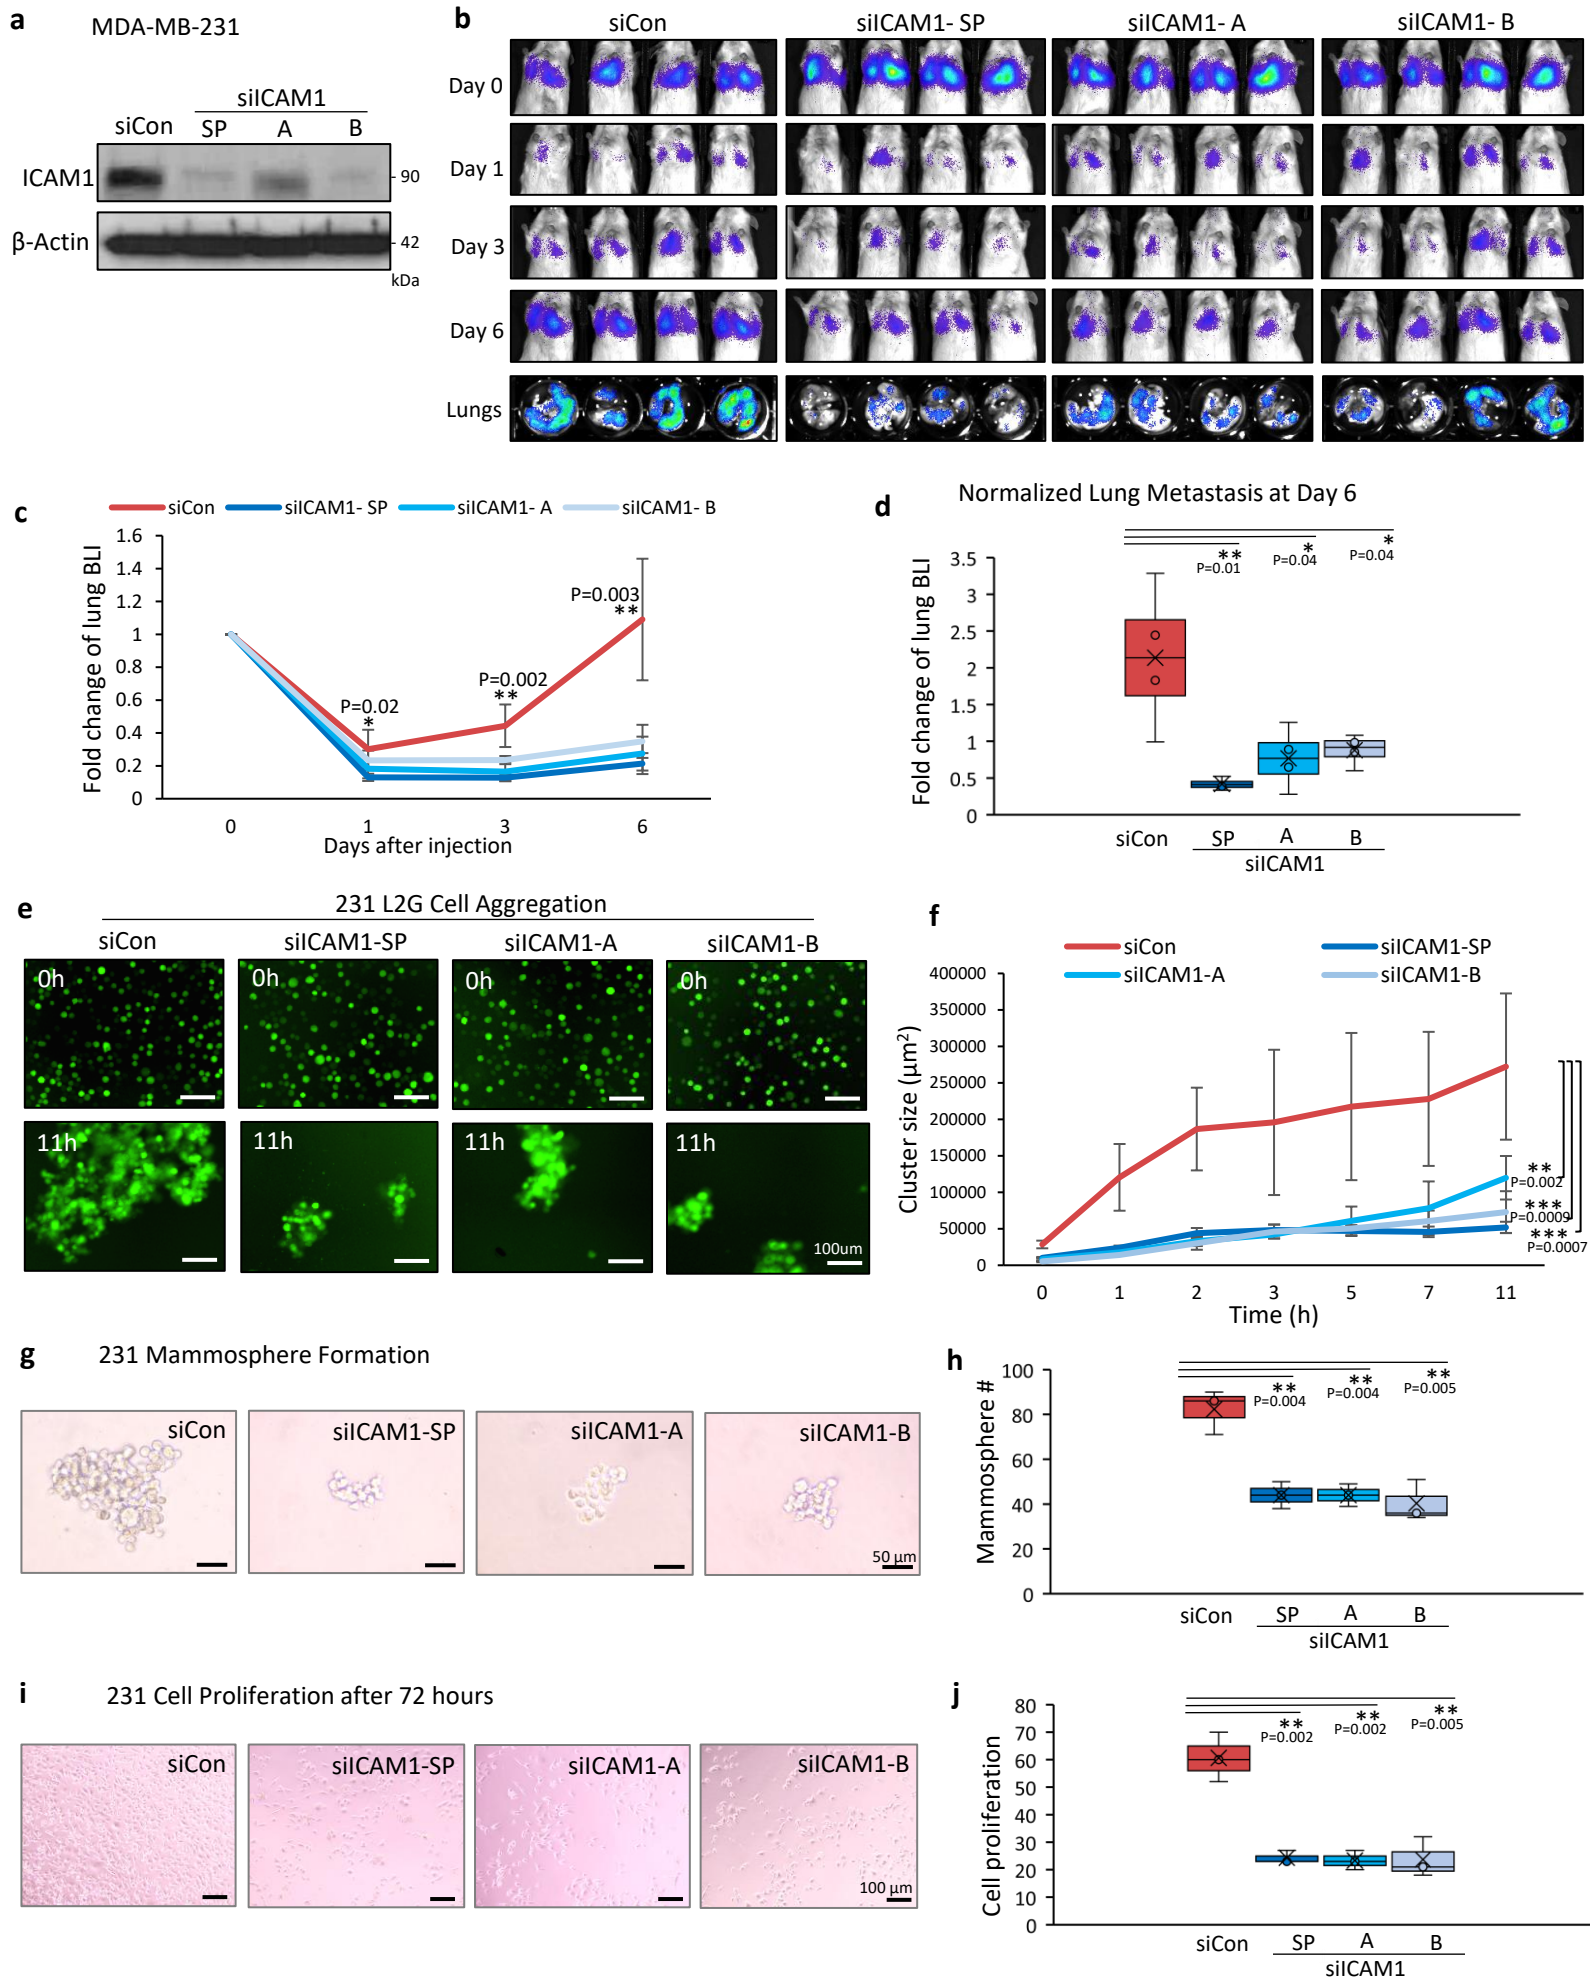

**Supplementary Fig. 9. ICAM1 smart pool and individual siRNAs inhibit lung colonization and clustering (related to Fig. 3)**

- a.** Immunoblot validation of the knockdown efficiency of ICAM1 using different ICAM1 siRNAs (Smartpool-SP, Individual-A, Individual-B) in MDA-MB-231 tumor cells. N= 2 independent experiments.
- b-d.** Representative images (b) and quantitative data (c,d) of BLI signals of mice injected with siCon and different siICAM1 (SP, A, B) -transfected MDA-MB-231 cells via tail vein. (n=4 mice per group. (c) Data are presented as mean values  $\pm$  SD. Error bars represent SD values. (d) The boxes range from the first to third quartile with x in a box indicating mean value and whisker lines extending to outliers (minimum and maximum). Two-sided *t* test \*P=0.02; \*\*P=0.002; \*\*\*P=0.003. (d) Two-sided *t* test \*\*P=0.01; \*P=0.04; \*P = 0.04).
- e-j.** Effect of knockdown of different ICAM1 siRNAs (SP, A, B) on MDA-MB-231 tumor cell clustering (e-f), tumor mammosphere formation (g-h), and tumor proliferation (i-j). (Clustering n= 10 biological replicates. Mammosphere n= 3 biological replicates. Proliferation n= 3 biological replicates. (f) Data are presented as mean values  $\pm$  SD. Error bars represent SD values. (h,j) The boxes range from the first to third quartile and x in a box indicates mean value. Two-sided *t* test values shown in e-j. N = 1-4 independent experiments (4 times for siICAM1-SP).

## Supplementary Fig. 10

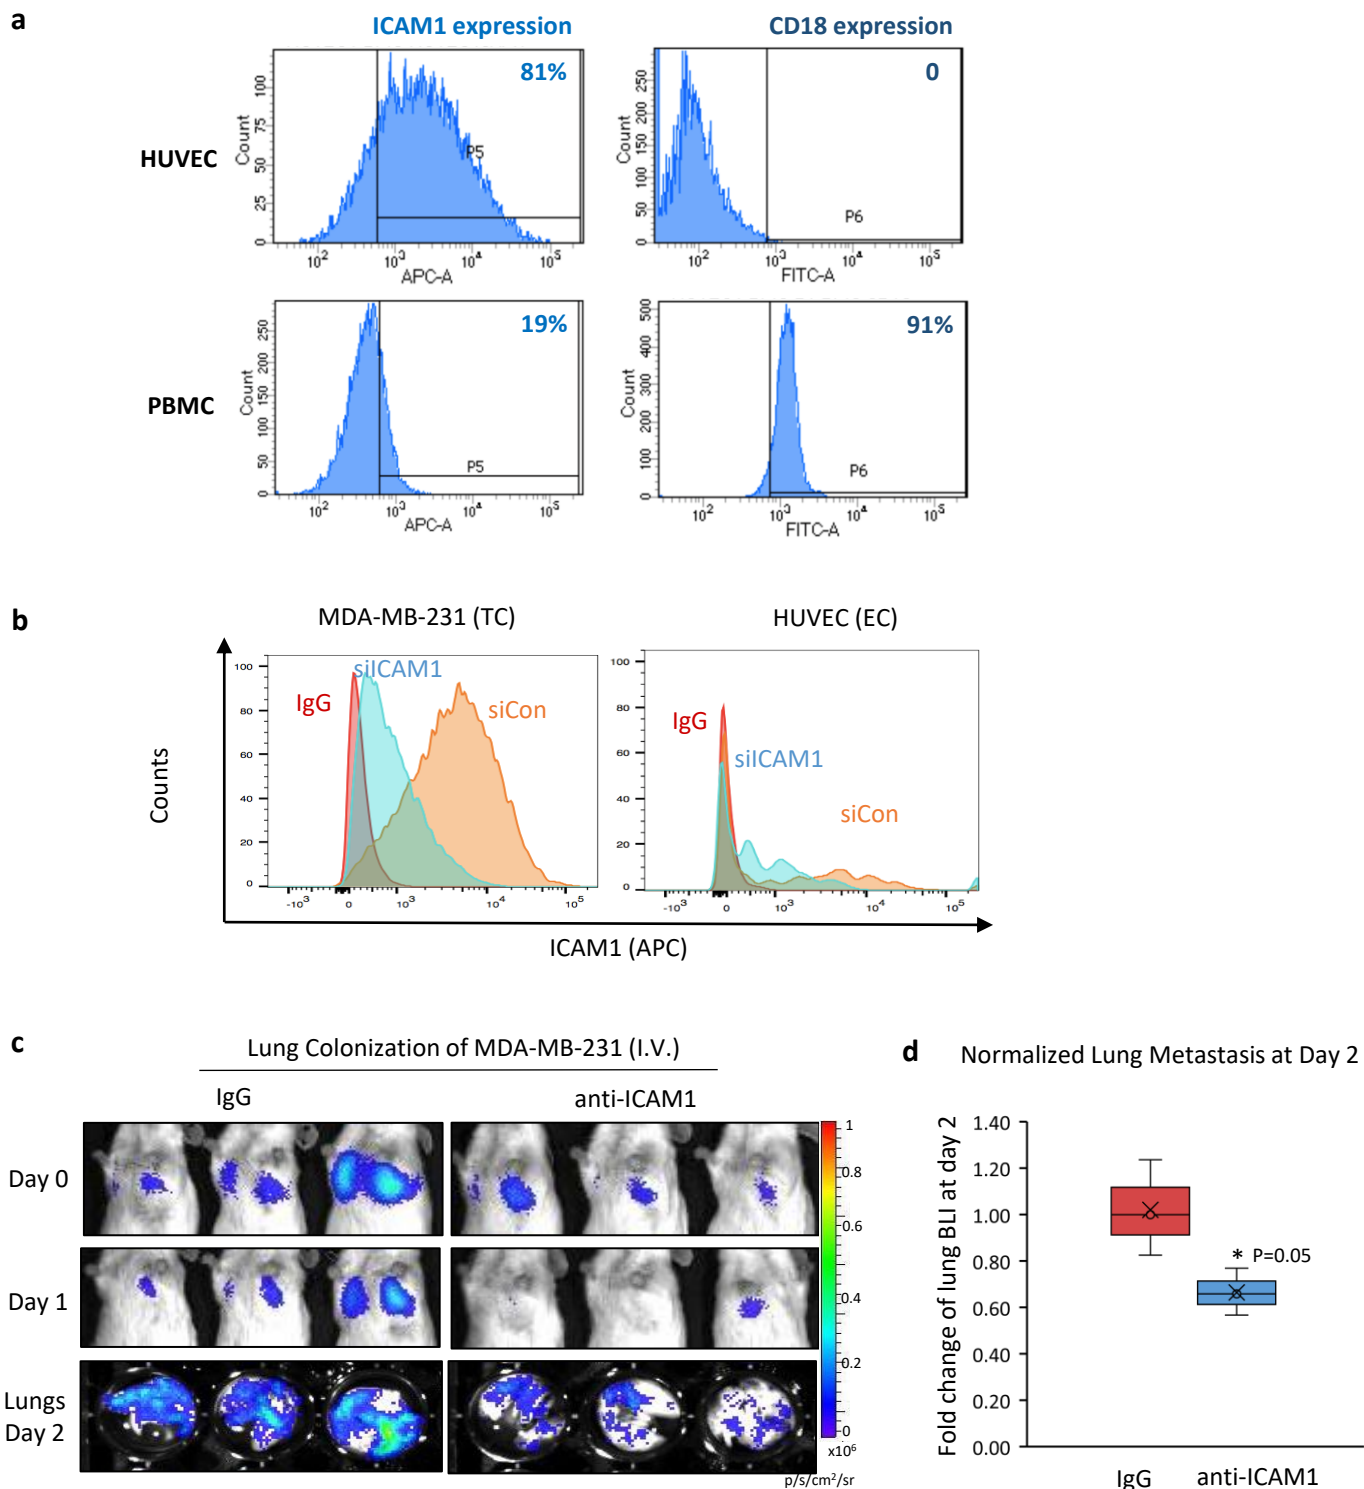

### Supplementary Fig. 10. Anti-ICAM1 inhibits lung colonization of TNBC cells (related to Fig. 4)

**a.** Flow cytometry of ICAM1 and integrin beta-2 (CD18) expression in human HUVECs and PBMC cells.

**b.** Flow cytometry validation of *ICAM1* knockdowns in breast tumor cells and HUVECs.

**c-d.** Representative BLI images (c) and quantitative data (d) of mice pretreated with IgG or anti-ICAM1 neutralizing antibody (80ug/mouse) through tail vein, followed 3 hours later with tail vein injection of MDA-MB-231 cells which have been preincubated with IgG or anti-ICAM1 antibody (100ug /1x10<sup>5</sup> cells) for 30min. Lungs were collected 2 days after injection. (n=3 mice per group. Two-sided *t* test \*P=0.05. N= 2 independent experiments). The boxes range from the first to third quartile with x in a box indicating mean value and whisker lines extending to outliers (minimum and maximum).

Supplementary. Table 1. LUNG MET SPECIFIC PATHWAYS (related to Fig. 1)

Benjamini-Hochberg's (BH) false discovery rate (FDR) corrected Hypergeometric P-values

| PATHWAY                                               | Mouse 1               |             |             | Mouse 2               |             |                                    | Mouse3                |             |          |
|-------------------------------------------------------|-----------------------|-------------|-------------|-----------------------|-------------|------------------------------------|-----------------------|-------------|----------|
|                                                       | M1_HyperG<br>eom_PVal | M1_BH       | M1_Genes    | M2_HyperGeo<br>m_PVal | M2_BH       | M2_Genes                           | M3_HyperG<br>eom_PVal | M3_BH       | M3_Genes |
| HIF-1-alpha transcription factor network              | 0.01513362            | 0.077043903 | NCOA1       | 0.001064666           | 0.016532567 | ALDOA,CP,LDHA,FOS,ABCG2,PFKL       | 0.00101922            | 0.026825267 | EGLN3    |
| Canonical NF-kappaB pathway                           | 0.0019306             | 0.05637933  | TNFAIP3     | 0.017435629           | 0.073690206 | TNFAIP3,TNFRSF1A                   | -                     | -           | -        |
| Glucocorticoid receptor regulatory network            | 0.00176703            | 0.05637933  | ICAM1,NCOA1 | 0.004269218           | 0.032468243 | ICAM1,CDKN1A,IL6,FOS,PPT1,SGK1     | -                     | -           | -        |
| Integrin-linked kinase signaling                      | 0.0072568             | 0.05637933  | ZEB1        | 0.004493373           | 0.032468243 | GIT2,RHO,LRMS1,TNS1                | -                     | -           | -        |
| Regulation of nuclear SMAD2/3 signaling               | 0.00164899            | 0.05637933  | FOXO3,NCOA1 | 0.000832729           | 0.016532567 | ATF3,CDK4,CDKN1A,IRF7,FOS,SIN3B,SM | -                     | -           | -        |
| Thromboxane A2 receptor signaling                     | 0.01222613            | 0.068466324 | ICAM1       | 0.00298155            | 0.029037709 | ICAM1,VCAM1,TGM2,GN2,PRKCH         | -                     | -           | -        |
| TNF receptor signaling pathway                        | 0.00757283            | 0.05637933  | TNFAIP3     | 0.000807359           | 0.016532567 | TNFAIP3,MAP3K5,MAP3K3,TNFRSF1A,TX  | -                     | -           | -        |
| Validated nuclear estrogen receptor alpha network     | 0.01513362            | 0.077043903 | NCOA1       | 0.0052185             | 0.035422545 | C3,CTSD,NEDD8,PCNA,CD82            | -                     | -           | -        |
| Validated nuclear estrogen receptor beta network      | 0.00081307            | 0.05637933  | NCOA1       | 0.005168398           | 0.035422545 | C3,NEDD8                           | -                     | -           | -        |
| Validated targets of C-MYC transcriptional repression | 0.01385428            | 0.075208668 | FOXO3       | 0.004146363           | 0.032468243 | CEBPD,CDKN1A,GBP2,NDRG2,SMAD2      | -                     | -           | -        |
| HIF-2-alpha transcription factor network              | -                     | -           | -           | 0.048514504           | 0.125588936 | ABCG2,FLT1                         | 0.00027022            | 0.020176545 | EGLN3    |
| amb2 Integrin signaling                               | 0.0060547             | 0.05637933  | ICAM1       | -                     | -           | -                                  | -                     | -           | -        |
| Atypical NF-kappaB pathway                            | 0.00104927            | 0.05637933  | REL         | -                     | -           | -                                  | -                     | -           | -        |
| Beta2 integrin cell surface interactions              | 0.00306427            | 0.05637933  | ICAM1       | -                     | -           | -                                  | -                     | -           | -        |
| CD40/CD40L signaling                                  | 0.00349676            | 0.05637933  | TNFAIP3     | -                     | -           | -                                  | -                     | -           | -        |
| Class I PI3K signaling events                         | 0.00889792            | 0.056946673 | FOXO3       | -                     | -           | -                                  | -                     | -           | -        |
| Class I PI3K signaling events mediated by Akt         | 0.00444175            | 0.05637933  | FOXO3       | -                     | -           | -                                  | -                     | -           | -        |
| FoxO family signaling                                 | 0.00855758            | 0.05637933  | FOXO3       | -                     | -           | -                                  | -                     | -           | -        |
| IL2 signaling events mediated by PI3K                 | 0.00444175            | 0.05637933  | FOXO3       | -                     | -           | -                                  | -                     | -           | -        |
| Insulin Pathway                                       | 0.0072568             | 0.05637933  | FOXO3       | -                     | -           | -                                  | -                     | -           | -        |
| mTOR signaling pathway                                | 0.01691532            | 0.077327179 | RRAGB       | -                     | -           | -                                  | -                     | -           | -        |
| Notch-mediated HES/HEY network                        | 0.00822326            | 0.05637933  | NCOA1       | -                     | -           | -                                  | -                     | -           | -        |
| p73 transcription factor network                      | 0.02276095            | 0.096197206 | FOXO3       | -                     | -           | -                                  | -                     | -           | -        |
| Regulation of Androgen receptor activity              | 0.0004888             | 0.05637933  | REL,NCOA1   | -                     | -           | -                                  | -                     | -           | -        |
| Retinoic acid receptors-mediated signaling            | 0.00495364            | 0.05637933  | NCOA1       | -                     | -           | -                                  | -                     | -           | -        |
| RXR and RAR heterodimerization with other nuclear     | 0.00372306            | 0.05637933  | NCOA1       | -                     | -           | -                                  | -                     | -           | -        |
| Signaling events mediated by HDAC Class III           | 0.00265888            | 0.05637933  | FOXO3       | -                     | -           | -                                  | -                     | -           | -        |
| Signaling events mediated by Stem cell factor recep   | 0.00959652            | 0.059711701 | FOXO3       | -                     | -           | -                                  | -                     | -           | -        |
| Sphingosine 1-phosphate (S1P) pathway                 | 0.00176595            | 0.05637933  | SGPL1       | -                     | -           | -                                  | -                     | -           | -        |
| Trk receptor signaling mediated by PI3K and PLC-ga    | 0.00495364            | 0.05637933  | FOXO3       | -                     | -           | -                                  | -                     | -           | -        |
| Validated transcriptional targets of AP1 family mem   | 0.00495364            | 0.05637933  | MGP         | -                     | -           | -                                  | -                     | -           | -        |
| a4b7 Integrin signaling                               | -                     | -           | -           | 0.018814343           | 0.075257371 | VCAM1                              | -                     | -           | -        |
| ALK1 pathway                                          | -                     | -           | -           | 0.001726884           | 0.020722563 | FKBP1A                             | -                     | -           | -        |
| ALK2 signaling events                                 | -                     | -           | -           | 0.027840708           | 0.091710566 | FKBP1A                             | -                     | -           | -        |
| Alpha-synuclein signaling                             | -                     | -           | -           | 0.007973222           | 0.047000044 | PARK7,FKBP1A,PTK2B                 | -                     | -           | -        |
| Alpha4 beta1 integrin signaling events                | -                     | -           | -           | 0.001107092           | 0.016532567 | JAM2,VCAM1,CD81,PTK2B              | -                     | -           | -        |
| Alpha9 beta1 integrin signaling events                | -                     | -           | -           | 0.021853348           | 0.081585833 | VCAM1,TGM2                         | -                     | -           | -        |
| Arf6 downstream pathway                               | -                     | -           | -           | 0.049882177           | 0.125588936 | PLAUR                              | -                     | -           | -        |
| ATF-2 transcription factor network                    | -                     | -           | -           | 0.000539334           | 0.014560972 | JUND,ATF3,PDGFRA,CDK4,IL6,FOS      | -                     | -           | -        |
| BARD1 signaling events                                | -                     | -           | -           | 0.035312362           | 0.105466256 | PCNA,TOPBP1                        | -                     | -           | -        |
| BCR signaling pathway                                 | -                     | -           | -           | 0.021784434           | 0.081585833 | BCL2A1,PAG1,FOS,SHC1               | -                     | -           | -        |
| Beta1 integrin cell surface interactions              | -                     | -           | -           | 0.001386041           | 0.01826313  | JAM2,VCAM1,CD81,PLAUR,TGM2,ITGA8   | -                     | -           | -        |
| Beta5 beta6 beta7 and beta8 integrin cell surface in  | -                     | -           | -           | 0.008783377           | 0.047175937 | VCAM1,PLAUR                        | -                     | -           | -        |
| BMP receptor signaling                                | -                     | -           | -           | 0.018400866           | 0.075257371 | BMP6,CTDSPL,SMURF2                 | -                     | -           | -        |
| C-MYB transcription factor network                    | -                     | -           | -           | 0.001055667           | 0.016532567 | PRTN3,CSF1R,CEBPD,CDKN1A,ETS2,KITL | -                     | -           | -        |

LUNG MET SPECIFIC PATHWAYS

| PATHWAY                                                    | Mouse 1               |       |          | Mouse 2               |             |                                      | Mouse3                |       |          |
|------------------------------------------------------------|-----------------------|-------|----------|-----------------------|-------------|--------------------------------------|-----------------------|-------|----------|
|                                                            | M1_HyperG<br>eom_PVal | M1_BH | M1_Genes | M2_HyperGeo<br>m_PVal | M2_BH       | M2_Genes                             | M3_HyperG<br>eom_PVal | M3_BH | M3_Genes |
| Calcineurin-regulated NFAT-dependent transcription         | -                     | -     | -        | 0.030549671           | 0.096382061 | CDK4,FOS,SLC3A2                      | -                     | -     | -        |
| Calcium signaling in the CD4+ TCR pathway                  | -                     | -     | -        | 0.005652848           | 0.037242292 | FKBP1A,FOS,RCAN1                     | -                     | -     | -        |
| Cellular roles of Anthrax toxin                            | -                     | -     | -        | 0.015433689           | 0.066483585 | VCAM1,IL1B                           | -                     | -     | -        |
| CXCR3-mediated signaling events                            | -                     | -     | -        | 0.026697514           | 0.090609744 | CXCL10,GNG2,ITGAL                    | -                     | -     | -        |
| CXCR4-mediated signaling events                            | -                     | -     | -        | 0.003795429           | 0.032468243 | RGS1,RHOB,PAG1,MMP9,GNG2,ITGA8,PTK2B | -                     | -     | -        |
| Direct p53 effectors                                       | -                     | -     | -        | 0.002098503           | 0.022384037 | BCL2A1,ATF3,CCNG1,CTSD,CDKN1A,E2F3   | -                     | -     | -        |
| E2F transcription factor network                           | -                     | -     | -        | 0.009056095           | 0.047175937 | CES1,DSCR3,CDKN1A,E2F3,TOBPBP1       | -                     | -     | -        |
| EGF receptor (ErbB1) signaling pathway                     | -                     | -     | -        | 0.013084653           | 0.061061714 | SHC1,SHC1,SHC1                       | -                     | -     | -        |
| EGFR-dependent Endothelin signaling events                 | -                     | -     | -        | 0.018814343           | 0.075257371 | SHC1                                 | -                     | -     | -        |
| Endogenous TLR signaling                                   | -                     | -     | -        | 0.000290686           | 0.013022711 | BGN,LY96,S100A9,TLR6                 | -                     | -     | -        |
| FGF signaling pathway                                      | -                     | -     | -        | 0.003828132           | 0.032468243 | PLAUR,MMP9,FOS,PTK2B,SHC1            | -                     | -     | -        |
| FOXM1 transcription factor network                         | -                     | -     | -        | 0.019910409           | 0.078244412 | CDK4,CENPA,FOS                       | -                     | -     | -        |
| Glypican 1 network                                         | -                     | -     | -        | 0.029516771           | 0.095822559 | FLT1,SMAD2                           | -                     | -     | -        |
| Hedgehog signaling events mediated by Gli proteins         | -                     | -     | -        | 0.030549671           | 0.096382061 | SPOP,GNG2,SIN3B                      | -                     | -     | -        |
| HIV-1 Nef: Negative effector of Fas and TNF-alpha          | -                     | -     | -        | 0.01084374            | 0.053936085 | MAP3K5,CYTIP,TNFRSF1A                | -                     | -     | -        |
| IGF1 pathway                                               | -                     | -     | -        | 0.006368121           | 0.039623864 | IGF1R,SHC1,SHC1                      | -                     | -     | -        |
| IL1-mediated signaling events                              | -                     | -     | -        | 0.008866662           | 0.047175937 | IL1B,IL1RN,MAP3K3                    | -                     | -     | -        |
| IL12-mediated signaling events                             | -                     | -     | -        | 0.004146363           | 0.032468243 | B2M,GADD45B,HLA-A,IL1B,FOS           | -                     | -     | -        |
| IL2-mediated signaling events                              | -                     | -     | -        | 0.011316946           | 0.053936085 | MAPKAPK2,FOS,PTK2B,SHC1              | -                     | -     | -        |
| IL27-mediated signaling events                             | -                     | -     | -        | 0.024269712           | 0.086292311 | IL1B,IL6                             | -                     | -     | -        |
| IL5-mediated signaling events                              | -                     | -     | -        | 0.04392034            | 0.121458717 | SDCBP                                | -                     | -     | -        |
| IL6-mediated signaling events                              | -                     | -     | -        | 0.026697514           | 0.090609744 | CEBPD,IL6,FOS                        | -                     | -     | -        |
| Integrin family cell surface interactions                  | -                     | -     | -        | 0.032346411           | 0.100633278 | ITGA8,ITGAL                          | -                     | -     | -        |
| Lissencephaly gene (LIS1) in neuronal migration and        | -                     | -     | -        | 0.035312362           | 0.105466256 | LRPAP1,DYNLT1                        | -                     | -     | -        |
| LKB1 signaling events                                      | -                     | -     | -        | 0.026697514           | 0.090609744 | CTSD,STK11,MAPT                      | -                     | -     | -        |
| LPA receptor mediated events                               | -                     | -     | -        | 0.001271494           | 0.017800911 | MMP9,HBEGF,GNG2,IL6,FOS,PTK2B        | -                     | -     | -        |
| Nongenotropic Androgen signaling                           | -                     | -     | -        | 0.041648624           | 0.118092302 | GNG2,FOS                             | -                     | -     | -        |
| Osteopontin-mediated events                                | -                     | -     | -        | 0.006368121           | 0.039623864 | MMP9,FOS,PTK2B                       | -                     | -     | -        |
| p38 MAPK signaling pathway                                 | -                     | -     | -        | 0.000424395           | 0.014560972 | MAP3K5,GADD45B,MAP3K3,TXN            | -                     | -     | -        |
| p38 signaling mediated by MAPKAP kinases                   | -                     | -     | -        | 0.013568784           | 0.062028727 | LSP1,MAPKAPK2                        | -                     | -     | -        |
| PAR4-mediated thrombin signaling events                    | -                     | -     | -        | 0.049882177           | 0.125588936 | GNG2                                 | -                     | -     | -        |
| PDGF receptor signaling network                            | -                     | -     | -        | 0.008226034           | 0.047175937 | PDGFRA                               | -                     | -     | -        |
| PDGFR-alpha signaling pathway                              | -                     | -     | -        | 0.001757717           | 0.020722563 | PDGFRA,FOS,SHC1                      | -                     | -     | -        |
| PDGFR-beta signaling pathway                               | -                     | -     | -        | 0.039030678           | 0.11354379  | ACTN4,JUND,PAG1,S1PR1,FOS,SHC1       | -                     | -     | -        |
| Plasma membrane estrogen receptor signaling                | -                     | -     | -        | 0.000558662           | 0.014560972 | IGF1R,MMP9,HBEGF,GNG2,SHC1           | -                     | -     | -        |
| Plexin-D1 Signaling                                        | -                     | -     | -        | 0.00245746            | 0.025021406 | ITGA8,NRP1,RRAS                      | -                     | -     | -        |
| PLK2 and PLK4 events                                       | -                     | -     | -        | 0.000585039           | 0.014560972 | PLK2                                 | -                     | -     | -        |
| Polo-like kinase signaling events in the cell cycle        | -                     | -     | -        | 0.003398323           | 0.031717678 | PLK2                                 | -                     | -     | -        |
| Rapid glucocorticoid signaling                             | -                     | -     | -        | 0.014869658           | 0.065309868 | GNG2                                 | -                     | -     | -        |
| Ras signaling in the CD4+ TCR pathway                      | -                     | -     | -        | 0.049882177           | 0.125588936 | FOS                                  | -                     | -     | -        |
| Regulation of cytoplasmic and nuclear SMAD2/3 signaling    | -                     | -     | -        | 0.008783377           | 0.047175937 | CTDSPL,SMAD2                         | -                     | -     | -        |
| Regulation of Ras family activation                        | -                     | -     | -        | 0.000958223           | 0.016532567 | RASGRP2,RASA2,GBP2,RRAS              | -                     | -     | -        |
| Regulation of retinoblastoma protein                       | -                     | -     | -        | 0.020529439           | 0.079286111 | CEBPD,CDK4,CDKN1A,E2F3               | -                     | -     | -        |
| Role of Calcineurin-dependent NFAT signaling in lymphocyte | -                     | -     | -        | 0.011316946           | 0.053936085 | FKBP8,FKBP1A,PRKCH,RCAN1             | -                     | -     | -        |
| S1P3 pathway                                               | -                     | -     | -        | 0.035312362           | 0.105466256 | S1PR1,FLT1                           | -                     | -     | -        |

LUNG MET SPECIFIC PATHWAYS

| PATHWAY                                               | Mouse 1               |       |          | Mouse 2               |             |                             | Mouse3                |             |          |
|-------------------------------------------------------|-----------------------|-------|----------|-----------------------|-------------|-----------------------------|-----------------------|-------------|----------|
|                                                       | M1_HyperG<br>eom_PVal | M1_BH | M1_Genes | M2_HyperGeo<br>m_PVal | M2_BH       | M2_Genes                    | M3_HyperG<br>eom_PVal | M3_BH       | M3_Genes |
| SHP2 signaling                                        | -                     | -     | -        | 0.013987103           | 0.062662221 | PAG1,IGF1R,IL6,SHC1         | -                     | -           | -        |
| Signaling events mediated by HDAC Class II            | -                     | -     | -        | 0.048514504           | 0.125588936 | GNG2,HDAC5                  | -                     | -           | -        |
| Signaling events mediated by PTP1B                    | -                     | -     | -        | 0.036911283           | 0.108791151 | CSF1R,SHC1,TXN              | -                     | -           | -        |
| Signaling mediated by p38-gamma and p38-delta         | -                     | -     | -        | 0.027840708           | 0.091710566 | MAPT                        | -                     | -           | -        |
| Syndecan-4-mediated signaling events                  | -                     | -     | -        | 0.041648624           | 0.118092302 | MMP9,SDCBP                  | -                     | -           | -        |
| TCR signaling in na&#xef;ve CD8+ T cells              | -                     | -     | -        | 0.002080467           | 0.022384037 | B2M,PAG1,RASGRP2,HLA-A,SHC1 | -                     | -           | -        |
| TGF-beta receptor signaling                           | -                     | -     | -        | 0.01051037            | 0.053507339 | FKBP1A,SHC1,SMAD2,SMURF2    | -                     | -           | -        |
| Validated targets of C-MYC transcriptional activation | -                     | -     | -        | 0.042723246           | 0.11962509  | CDK4,MMP9,E2F3,LDHA         | -                     | -           | -        |
| VEGF and VEGFR signaling network                      | -                     | -     | -        | 0.007451802           | 0.045113609 | NRP1,FLT1                   | -                     | -           | -        |
| VEGFR1 specific signals                               | -                     | -     | -        | 0.004387242           | 0.032468243 | CD2AP,NRP1,FLT1             | -                     | -           | -        |
| Noncanonical Wnt signaling pathway                    | -                     | -     | -        | -                     | -           | -                           | 0.00023912            | 0.020176545 | DAAM1    |
| Regulation of nuclear beta catenin signaling and tar  | -                     | -     | -        | -                     | -           | -                           | 0.0015673             | 0.026825267 | COX2     |
| Validated transcriptional targets of TAp63 isoforms   | -                     | -     | -        | -                     | -           | -                           | 0.00076127            | 0.026825267 | DHRS3    |

Supplementary Table 2. ICAM1 KO\_vs\_Control\_Differential\_Expr (related to Fig. 3)

| Gene Symbol  | Log2 Fold Change | LFC Standard Err | Wald Statistic | p Value   | FDR Adj p | Val Significa | Status | Base Mean   | KD          | Control     | siICAM1_1   | siICAM1_2   | siICAM1_3   | siCon_1     | siCon_2     | siCon_3     |
|--------------|------------------|------------------|----------------|-----------|-----------|---------------|--------|-------------|-------------|-------------|-------------|-------------|-------------|-------------|-------------|-------------|
| ICAM1        | -2.899577706     | 0.133762238      | -21.67710225   | 3.37E-104 | 4.73E-100 | Yes           | OK     | 1368.747468 | 296.3880598 | 2441.106876 | 300.0653501 | 313.0570444 | 276.0417849 | 2934.716474 | 2235.475921 | 2153.128233 |
| SEC23A       | -2.217949205     | 0.111011262      | -19.97949729   | 8.31E-89  | 5.82E-85  | Yes           | OK     | 2443.53063  | 829.1566509 | 4057.904608 | 847.2969916 | 857.5489996 | 782.6239615 | 4133.838952 | 4517.890969 | 3521.983904 |
| GADAP1       | 2.726502298      | 0.137484526      | 19.83133946    | 1.60E-87  | 7.46E-84  | Yes           | OK     | 453.6597552 | 798.4053981 | 108.9141124 | 769.7725091 | 830.6860189 | 794.7576663 | 115.3163079 | 107.959992  | 103.4660371 |
| IL24         | 2.407548636      | 0.121975577      | 19.73795655    | 1.02E-86  | 3.57E-83  | Yes           | OK     | 1502.139624 | 2554.655183 | 449.6240651 | 2838.308114 | 2391.838475 | 2433.81896  | 461.2652317 | 383.7273628 | 503.8796008 |
| LPGAT1       | -1.623400733     | 0.090765476      | -17.88566315   | 1.53E-71  | 4.27E-68  | Yes           | OK     | 1994.992605 | 960.2421993 | 3029.743011 | 940.3263707 | 948.4698574 | 991.9303697 | 3173.705344 | 2941.909782 | 2973.613907 |
| HIF1A        | -1.651305298     | 0.095445807      | -17.30097276   | 4.63E-67  | 1.08E-63  | Yes           | OK     | 6639.442794 | 3140.845578 | 10138.04001 | 3307.10322  | 3034.483629 | 3080.949884 | 11166.46248 | 9296.294093 | 9951.363452 |
| GOLGA7B      | 3.451055543      | 0.199722725      | 17.27923318    | 6.74E-67  | 1.35E-63  | Yes           | OK     | 248.7008034 | 466.3457602 | 31.05584661 | 508.0133739 | 483.5336528 | 407.4902538 | 25.06876259 | 24.64304165 | 43.4557356  |
| LSM14A       | -1.641524477     | 0.095423089      | -17.20259205   | 2.54E-66  | 4.45E-63  | Yes           | OK     | 1415.188413 | 672.7988045 | 2157.578021 | 678.5672355 | 666.4085599 | 673.420618  | 2052.296031 | 2189.710272 | 2230.727761 |
| SCG2         | 3.022027272      | 0.177756184      | 17.0009684     | 8.08E-65  | 1.26E-61  | Yes           | OK     | 1102.706308 | 2004.513526 | 200.8990895 | 2324.822424 | 1756.425662 | 1932.292494 | 271.5782614 | 131.4295555 | 199.6894517 |
| YOD1         | 1.887187863      | 0.111863692      | 16.87042356    | 7.43E-64  | 1.04E-60  | Yes           | OK     | 2521.531268 | 4005.861941 | 1037.200595 | 4099.677048 | 4437.557775 | 3480.351002 | 1011.106758 | 1120.671656 | 979.8233717 |
| ENTPD7       | 1.932312834      | 0.115034794      | 16.79763805    | 2.54E-63  | 3.24E-60  | Yes           | OK     | 1122.791517 | 1796.576732 | 449.0063017 | 1960.913382 | 1849.412903 | 1579.403912 | 442.8814725 | 444.7482279 | 459.3892049 |
| CDK6         | -1.688314736     | 0.101865913      | -16.57389298   | 1.08E-61  | 1.26E-58  | Yes           | OK     | 3591.984734 | 1660.505626 | 5523.463842 | 1618.893606 | 1732.662256 | 1629.961015 | 5989.763009 | 4855.852683 | 5724.779835 |
| GHITM        | -1.554850166     | 0.094236848      | -16.49938637   | 3.71E-61  | 4.00E-58  | Yes           | OK     | 4461.015413 | 2223.575981 | 6698.454846 | 2337.591162 | 2292.652084 | 2040.484695 | 7077.747305 | 6756.887325 | 6260.729907 |
| G3BP2        | -1.44902114      | 0.090259404      | -16.05396304   | 5.36E-58  | 5.37E-55  | Yes           | OK     | 4494.474288 | 2372.526068 | 6616.422508 | 2440.653121 | 2292.652084 | 2384.272999 | 7149.611091 | 6509.28343  | 6190.373002 |
| PPM1F        | -2.014868596     | 0.127498237      | -15.80310941   | 2.96E-56  | 2.77E-53  | Yes           | OK     | 1597.380043 | 602.8963418 | 2591.863745 | 597.394542  | 518.662166  | 692.6323173 | 2571.219417 | 2291.802873 | 2912.568945 |
| PPFIA4       | -3.746750364     | 0.238743083      | -15.69364994   | 1.67E-55  | 1.38E-52  | Yes           | OK     | 140.9394456 | 10.70424486 | 271.1746464 | 12.7687383  | 6.199149395 | 13.1448469  | 291.6332715 | 292.1960653 | 229.6946024 |
| HMGAA2       | 1.698586704      | 0.108418114      | 15.66700107    | 2.54E-55  | 1.98E-52  | Yes           | OK     | 2719.394406 | 4193.250983 | 1245.53783  | 4314.921493 | 3968.488804 | 4296.342651 | 1148.149327 | 1152.355567 | 1436.108595 |
| CNIH4        | -1.69853302      | 0.115526314      | -14.70256395   | 6.21E-49  | 4.58E-46  | Yes           | OK     | 1095.912836 | 500.0191112 | 1691.806562 | 499.8048992 | 532.0936564 | 468.158778  | 1868.458439 | 1683.941179 | 1523.020067 |
| RCSD1        | -2.544120902     | 0.173198813      | -14.68902043   | 7.58E-49  | 5.31E-46  | Yes           | OK     | 269.7716153 | 68.66606135 | 470.8771692 | 80.26064075 | 64.05787708 | 61.67966621 | 498.0327502 | 506.9425711 | 407.6561863 |
| LOC105376575 | -1.530167506     | 0.10466617       | -14.61950411   | 2.11E-48  | 1.35E-45  | Yes           | OK     | 1419.093712 | 713.549572  | 2124.637851 | 701.3685539 | 777.993249  | 661.2869132 | 2193.516727 | 2189.710272 | 1990.686554 |
| NUCB2        | -1.530167506     | 0.10466617       | -14.61950411   | 2.11E-48  | 1.35E-45  | Yes           | OK     | 1419.093712 | 713.549572  | 2124.637851 | 701.3685539 | 777.993249  | 661.2869132 | 2193.516727 | 2189.710272 | 1990.686554 |
| SLCO4A1      | -2.087297996     | 0.142777273      | -14.61925944   | 2.12E-48  | 1.35E-45  | Yes           | OK     | 686.6357753 | 244.7998701 | 1128.47168  | 204.2998128 | 296.5259794 | 233.573818  | 1093.833674 | 1240.36643  | 1051.214937 |
| NUDT15       | -1.87582143      | 0.131536123      | -14.26088429   | 3.84E-46  | 2.34E-43  | Yes           | OK     | 566.1437508 | 231.1651922 | 901.1223093 | 225.2770258 | 239.7004433 | 228.5181076 | 1016.956136 | 821.4347217 | 864.9760704 |
| YWHAZ        | -1.297422352     | 0.092272223      | -14.06081163   | 6.61E-45  | 3.86E-42  | Yes           | OK     | 7148.702707 | 4076.745517 | 10220.6599  | 4050.4262   | 4343.537343 | 3836.27301  | 11048.6393  | 9623.694503 | 9989.645885 |
| TRIM16L      | -2.300034993     | 0.164384561      | -13.99179451   | 1.75E-44  | 9.81E-42  | Yes           | OK     | 609.782051  | 185.3545436 | 1034.209558 | 160.5212815 | 150.8459686 | 244.6963807 | 1048.709902 | 910.6190629 | 1143.29971  |
| FAM46C       | -1.913337713     | 0.139164239      | -13.74877432   | 5.18E-43  | 2.79E-40  | Yes           | OK     | 977.9930193 | 387.7697981 | 1568.21624  | 394.0067819 | 323.3889601 | 445.9136525 | 1667.908338 | 1329.550771 | 1707.189613 |
| MAT2B        | -1.748625604     | 0.127746231      | -13.68827554   | 1.19E-42  | 6.19E-40  | Yes           | OK     | 925.3379946 | 407.1667329 | 1443.509256 | 403.1273092 | 448.2391817 | 375.1337076 | 1573.482665 | 1527.868582 | 1229.176521 |
| TRIM16       | -1.890837768     | 0.138523331      | -13.64995889   | 2.02E-42  | 1.00E-39  | Yes           | OK     | 751.4711661 | 302.1699806 | 1200.772352 | 270.8796625 | 266.563424  | 369.0668552 | 1194.94435  | 1117.151221 | 1290.221483 |
| REST         | -1.400806533     | 0.102637103      | -13.6481496    | 2.07E-42  | 1.00E-39  | Yes           | OK     | 1241.397676 | 669.0654191 | 1813.729933 | 643.9092315 | 723.234096  | 640.0529297 | 1891.85595  | 1735.574219 | 1813.759631 |
| CCNA1        | -2.996963718     | 0.223380561      | -13.41640341   | 4.85E-41  | 2.26E-38  | Yes           | OK     | 130.9093745 | 20.60659554 | 241.2121535 | 20.97721292 | 18.59744818 | 22.24512552 | 225.6188633 | 282.8082399 | 215.2093572 |
| MIR210HG     | -3.30872157      | 0.247459808      | -13.37074331   | 8.96E-41  | 4.05E-38  | Yes           | OK     | 113.3925994 | 11.92826526 | 214.8569336 | 7.296421887 | 8.265532526 | 20.22284138 | 228.961365  | 215.919984  | 199.6894517 |
| YKT6         | -1.173964728     | 0.088486997      | -13.26708747   | 3.59E-40  | 1.57E-37  | Yes           | OK     | 1977.813077 | 1201.178912 | 2754.447242 | 1161.043133 | 1211.933707 | 1230.559898 | 2834.441424 | 2676.703714 | 2752.196588 |
| SEL1L        | -1.284034951     | 0.097241995      | -13.20453111   | 8.26E-40  | 3.51E-37  | Yes           | OK     | 2213.504133 | 1268.935958 | 3158.072308 | 1278.697936 | 1196.435833 | 1331.674105 | 3400.995458 | 2963.032389 | 3110.189076 |
| CPNE2        | -1.921991231     | 0.145793039      | -13.18301097   | 1.10E-39  | 4.53E-37  | Yes           | OK     | 362.2356233 | 141.9169258 | 582.5543207 | 139.5440686 | 144.6468192 | 141.5598897 | 590.7871718 | 639.5456047 | 517.3301857 |
| MCM3         | -1.281594276     | 0.097798812      | -13.10439511   | 3.11E-39  | 1.24E-36  | Yes           | OK     | 7316.832865 | 4198.003661 | 10435.66207 | 3940.979872 | 4438.590967 | 4214.440144 | 10152.84885 | 11566.97436 | 9587.163001 |
| HIST2H2AB    | -1.488563709     | 0.114095325      | -13.04666702   | 6.64E-39  | 2.58E-36  | Yes           | OK     | 737.6078545 | 377.6569924 | 1097.558717 | 376.6777799 | 377.1149215 | 379.1782759 | 1180.738718 | 1016.232099 | 1095.705333 |
| TMEM198      | 2.63724413       | 0.203091904      | 12.98547151    | 1.48E-38  | 5.60E-36  | Yes           | OK     | 176.7337448 | 314.0163973 | 39.45109233 | 321.9546158 | 344.0527914 | 276.0417849 | 32.58939137 | 34.03086704 | 51.73301857 |
| CYR61        | 1.410744624      | 0.109451464      | 12.88922574    | 5.18E-38  | 1.91E-35  | Yes           | OK     | 6047.407313 | 8864.352049 | 3230.462578 | 8514.012289 | 9657.241565 | 8421.802293 | 3522.161144 | 2760.020665 | 3409.205924 |
| MARCH4       | 2.44779723       | 0.1915147        | 12.78124985    | 2.09E-37  | 7.50E-35  | Yes           | OK     | 301.1646908 | 522.8136444 | 79.51573708 | 473.3553699 | 616.8153648 | 478.2701987 | 53.48002686 | 95.05173208 | 90.01545231 |
| STX3         | 1.221031633      | 0.096353317      | 12.67244005    | 8.41E-37  | 2.94E-34  | Yes           | OK     | 4979.284403 | 7012.057323 | 2946.511483 | 7155.965765 | 7592.924817 | 6287.281385 | 3047.525906 | 2973.593692 | 2818.414852 |
| LINE00704    | -1.552906707     | 0.122822692      | -12.64348372   | 1.22E-36  | 4.15E-34  | Yes           | OK     | 557.8862159 | 274.5109149 | 841.261517  | 267.2314516 | 292.3932131 | 263.90808   | 870.7216874 | 871.8942831 | 781.1685804 |
| STEAP3       | -1.322130832     | 0.1052462        | -12.56226671   | 3.40E-36  | 1.14E-33  | Yes           | OK     | 1161.58254  | 650.852303  | 1672.312778 | 633.8766514 | 623.0145142 | 695.6657435 | 1591.030799 | 1794.248128 | 1631.659406 |
| BLOC1S6      | -1.571262557     | 0.126092209      | -12.46121844   | 1.21E-35  | 3.96E-33  | Yes           | OK     | 676.7551648 | 329.2677402 | 1024.242589 | 315.5702466 | 323.3889601 | 348.8440138 | 1153.163079 | 929.3947137 | 990.1699754 |
| ITPA         | -1.709547113     | 0.138669992      | -12.32816913   | 6.39E-35  | 2.03E-32  | Yes           | OK     | 530.7510284 | 236.7735916 | 824.7284652 | 222.5408675 | 208.7046963 | 279.0752111 | 848.9954265 | 863.6799359 | 761.5100333 |
| SH3PXD2A     | -1.454359707     | 0.118116016      | -12.31297628   | 7.71E-35  | 2.40E-32  | Yes           | OK     | 1108.37515  | 576.4617789 | 1640.288521 | 523.5182704 | 548.6247214 | 657.2423449 | 1532.53702  | 1625.267271 | 1763.061273 |
| ANSND1       | -1.295627756     | 0.105767868      | -12.24972932   | 1.69E-34  | 5.13E-32  | Yes           | OK     | 1346.065395 | 764.7444057 | 1927.386385 | 762.4706872 | 599.6902719 | 732.066858  | 2056.474158 | 1984.351592 | 1741.333405 |
| HSP90AB1     | -0.941655441     | 0.07714066       | -12.20699225   | 2.85E-34  | 8.50E-32  | Yes           | OK     | 25442.19562 | 17307.64696 | 33576.74428 | 17866.20104 | 17362.78426 | 16693.95556 | 34252.28596 | 32238.96587 | 34238.98101 |
| CHST15       | -1.072107102     | 0.088019936      | -12.1802758    | 3.96E-34  | 1.16E-31  | Yes           | OK     | 2577.931464 | 1645.062934 | 3510.799995 | 1683.64935  | 1549.787349 | 1701.752102 | 3617.422442 | 3466.454525 | 3448.523018 |
| C6orf120     | -1.347082703     | 0.110700786      | -12.16868239   | 4.56E-34  | 1.31E-31  | Yes           | OK     | 800.2722837 | 441.780431  | 1158.764136 | 449.6419988 | 428.7744998 | 446.9247945 | 1026.464979 | 1203.988606 | 1069.838824 |
| UBA2         | -1.146757182     | 0.09490621       | -12.08305738   | 1.30E-33  | 3.64E-31  | Yes           | OK     | 2008.93732  | 1234.174679 | 2783.699962 | 1231.271193 | 1327.651162 | 1143.60168  | 2860.345812 | 2744.765449 | 2745.988626 |
| AVL9         | 1.070178848      | 0.08883          |                |           |           |               |        |             |             |             |             |             |             |             |             |             |

## KO\_vs\_Control\_Differential\_Expr

| Gene Symbol                  | Log2 Fold Change | LFC Standard Err | Wald Statistic | p Value  | FDR Adj p | Val Significa | Status | Base Mean   | KD          | Control     | siCAM1_1    | siCAM1_2    | siCAM1_3    | siCon_1     | siCon_2     | siCon_3     |
|------------------------------|------------------|------------------|----------------|----------|-----------|---------------|--------|-------------|-------------|-------------|-------------|-------------|-------------|-------------|-------------|-------------|
| <a href="#">LRRFIP1</a>      | -1.247225211     | 0.104096035      | -11.98148621   | 4.44E-33 | 1.20E-30  | Yes           | OK     | 1418.600635 | 826.4596139 | 2010.741656 | 748.7952961 | 877.1796393 | 853.4039063 | 1916.924713 | 2120.47506  | 1994.825196 |
| <a href="#">ANKRD1</a>       | 1.24837005       | 0.104053606      | 11.94571265    | 6.84E-33 | 1.81E-30  | Yes           | OK     | 10025.64355 | 14215.81921 | 5835.467886 | 14307.37127 | 15910.11692 | 12429.96945 | 6174.436227 | 5469.581768 | 5862.385664 |
| <a href="#">PFKFB4</a>       | -1.661023036     | 0.139123289      | -11.9392163    | 7.39E-33 | 1.92E-30  | Yes           | OK     | 690.6383533 | 316.6859335 | 1064.590773 | 267.2314516 | 298.5923625 | 384.2339862 | 1071.271788 | 1123.018612 | 999.4819187 |
| <a href="#">MRC2</a>         | -1.724401078     | 0.14564411       | -11.83982704   | 2.43E-32 | 6.19E-30  | Yes           | OK     | 560.5457721 | 246.4145564 | 874.6769877 | 242.6060277 | 197.3395891 | 299.2980524 | 869.886062  | 912.9660192 | 841.1788819 |
| <a href="#">TCF12</a>        | -1.210026961     | 0.102235737      | -11.83565553   | 2.55E-32 | 6.39E-30  | Yes           | OK     | 1197.865953 | 711.6445361 | 1684.08737  | 725.9939777 | 682.939625  | 726.0000056 | 1804.950907 | 1587.715969 | 1659.595236 |
| <a href="#">FAM234B</a>      | 1.627421554      | 0.139930253      | 11.63023376    | 2.89E-31 | 7.11E-29  | Yes           | OK     | 458.2434475 | 702.3419904 | 214.1449046 | 659.414128  | 789.3583562 | 658.253487  | 205.5638533 | 238.2160693 | 198.6547913 |
| <a href="#">REF5</a>         | -1.067904777     | 0.091909716      | -11.61906292   | 3.30E-31 | 7.97E-29  | Yes           | OK     | 1950.323076 | 1245.892902 | 2654.75325  | 1258.632775 | 1171.639236 | 1307.406695 | 2726.645745 | 2660.27502  | 2577.338985 |
| <a href="#">STT3A</a>        | -1.054515954     | 0.091551793      | -11.51824471   | 1.07E-30 | 2.54E-28  | Yes           | OK     | 6675.380742 | 4292.507201 | 9058.254283 | 4463.586089 | 4037.712639 | 4376.222875 | 9750.913023 | 8389.195465 | 9034.654363 |
| <a href="#">MAGEF1</a>       | -1.522203542     | 0.132227577      | -11.51199754   | 1.15E-30 | 2.68E-28  | Yes           | OK     | 576.2808531 | 286.6782498 | 865.8834565 | 257.1988715 | 293.4264047 | 309.4094731 | 863.2010586 | 956.3847117 | 778.0645993 |
| <a href="#">NUDT3</a>        | -1.198840452     | 0.104371696      | -11.48626015   | 1.55E-30 | 3.55E-28  | Yes           | OK     | 2313.939707 | 1380.948656 | 3246.930759 | 1281.434094 | 1510.526069 | 1350.885804 | 3053.375284 | 3554.465388 | 3132.951604 |
| <a href="#">ETS1</a>         | 1.089290399      | 0.094944464      | 11.47292169    | 1.80E-30 | 4.08E-28  | Yes           | OK     | 7964.316079 | 10897.06542 | 5031.566737 | 11227.36918 | 11764.95236 | 9698.874726 | 4875.038699 | 5031.874409 | 5187.787102 |
| <a href="#">ICK</a>          | -1.524169507     | 0.13322998       | -11.44013914   | 2.63E-30 | 5.86E-28  | Yes           | OK     | 1374.637048 | 682.4695777 | 2066.804518 | 622.0199658 | 790.3915478 | 634.9972194 | 1916.924713 | 2431.446776 | 1852.042065 |
| <a href="#">S100A2</a>       | -1.800813067     | 0.158023297      | -11.39587077   | 4.38E-30 | 9.60E-28  | Yes           | OK     | 1200.323669 | 499.3024581 | 1901.34488  | 498.8928465 | 426.7081167 | 572.3064111 | 2264.544888 | 1410.520765 | 2028.968988 |
| <a href="#">PVR</a>          | 0.970198324      | 0.085212029      | 11.38569677    | 4.93E-30 | 1.06E-27  | Yes           | OK     | 4378.760489 | 5822.99942  | 2934.521557 | 6013.163687 | 5856.129795 | 5599.704778 | 2949.757732 | 2778.796316 | 3075.010624 |
| <a href="#">QLFML2A</a>      | -1.726115555     | 0.151893504      | -11.36398535   | 6.32E-30 | 1.34E-27  | Yes           | OK     | 772.9284258 | 337.6214484 | 1208.235403 | 293.6809809 | 296.5259794 | 422.6573849 | 1036.175521 | 1336.59164  | 1251.939049 |
| <a href="#">SNTB2</a>        | -1.143047277     | 0.101597741      | -11.25071551   | 2.30E-29 | 4.80E-27  | Yes           | OK     | 1321.8032   | 812.0734458 | 1831.532953 | 765.2122454 | 786.2587816 | 884.7493104 | 1891.020325 | 1774.298999 | 1829.279537 |
| <a href="#">CPA4</a>         | 1.685748698      | 0.15092062       | 11.16977059    | 5.73E-29 | 1.18E-26  | Yes           | OK     | 1712.770261 | 2659.728906 | 765.8116161 | 3061.761034 | 2332.946556 | 2584.479129 | 869.0504365 | 564.440016  | 863.9414101 |
| <a href="#">DDIT4</a>        | -1.903797344     | 0.170773688      | -11.14807188   | 7.32E-29 | 1.49E-26  | Yes           | OK     | 2049.524678 | 789.754784  | 3309.294572 | 753.3555598 | 573.421319  | 1042.487473 | 3870.616944 | 2653.234151 | 3404.032622 |
| <a href="#">HIST1H2BN</a>    | -1.241394766     | 0.111800543      | -11.10365595   | 1.20E-28 | 2.41E-26  | Yes           | OK     | 1041.697814 | 606.7352193 | 1476.660409 | 589.1860674 | 637.4791961 | 593.5403945 | 1432.261969 | 1638.175531 | 1359.543728 |
| <a href="#">TMCQ3</a>        | -1.325596464     | 0.11984159       | -11.06123893   | 1.93E-28 | 3.82E-26  | Yes           | OK     | 759.5613853 | 422.6178995 | 1096.504871 | 382.1500963 | 471.135354  | 414.5682483 | 1144.806825 | 1118.3247   | 1026.383088 |
| <a href="#">TMEM144</a>      | 1.624602898      | 0.147084854      | 11.04534463    | 2.31E-28 | 4.49E-26  | Yes           | OK     | 357.7968801 | 549.5804304 | 166.0133298 | 598.3065947 | 514.5293998 | 535.9052966 | 173.8100873 | 143.1643372 | 181.065565  |
| <a href="#">CANX</a>         | -0.898585286     | 0.08165505       | -11.00465047   | 3.63E-28 | 6.97E-26  | Yes           | OK     | 27531.55847 | 19090.99379 | 35972.12315 | 19017.2116  | 19009.69162 | 19246.07814 | 38492.24934 | 33756.27315 | 35667.84698 |
| <a href="#">FNIP2</a>        | 1.154758745      | 0.105462533      | 10.94946906    | 6.68E-28 | 1.27E-25  | Yes           | OK     | 1127.701734 | 1567.983419 | 687.4200493 | 1585.147655 | 1678.936294 | 1439.866306 | 711.9528576 | 665.3621245 | 684.951658  |
| <a href="#">RAB23</a>        | -1.431062541     | 0.130770171      | -10.94334071   | 7.15E-28 | 1.34E-25  | Yes           | OK     | 599.9944734 | 314.0266595 | 885.9622873 | 274.5278735 | 340.9532167 | 326.5988883 | 933.3935939 | 924.700801  | 799.792467  |
| <a href="#">ANKRD13B</a>     | 1.877675907      | 0.172459746      | 10.88761841    | 1.32E-27 | 2.43E-25  | Yes           | OK     | 269.1793014 | 433.1425693 | 105.2160336 | 436.8732605 | 428.7744998 | 433.7799476 | 88.57629499 | 91.53129756 | 135.5405086 |
| <a href="#">LDHA</a>         | -1.170213536     | 0.107513329      | -10.88435773   | 1.37E-27 | 2.49E-25  | Yes           | OK     | 16031.71491 | 9695.707069 | 22367.72275 | 10247.82454 | 9746.09604  | 9093.200627 | 25776.53732 | 21596.69231 | 19729.93862 |
| <a href="#">XPOT</a>         | -0.87296396      | 0.080248094      | -10.87831389   | 1.46E-27 | 2.63E-25  | Yes           | OK     | 3636.173011 | 2551.803033 | 4720.54299  | 2543.71508  | 2723.27385  | 2488.420632 | 4740.503006 | 4771.362255 | 4649.763709 |
| <a href="#">SOFr15</a>       | -1.492189849     | 0.137191503      | -10.87669289   | 1.49E-27 | 2.64E-25  | Yes           | OK     | 1200.454435 | 605.0726546 | 1795.836215 | 601.9548057 | 705.6698394 | 507.5933187 | 1941.15785  | 1923.330727 | 1521.020067 |
| <a href="#">TMEM30A</a>      | -1.211844867     | 0.111593935      | -10.8594151    | 1.80E-27 | 3.15E-25  | Yes           | OK     | 4234.517454 | 2504.504512 | 5964.530395 | 2478.959336 | 2846.442764 | 2188.111437 | 6336.547558 | 6130.24998  | 5426.793648 |
| <a href="#">LBH</a>          | -2.501389635     | 0.231018611      | -10.82765421   | 2.55E-27 | 4.40E-25  | Yes           | OK     | 94.41506764 | 21.00970245 | 167.8204328 | 19.15310745 | 18.59744818 | 25.27855173 | 161.275706  | 172.5012915 | 169.6843009 |
| <a href="#">P3H2</a>         | 1.19421742       | 0.110309649      | 10.82604677    | 2.59E-27 | 4.43E-25  | Yes           | OK     | 1508.709761 | 2116.250185 | 901.1693366 | 2223.58457  | 2213.096334 | 1912.069653 | 872.3929382 | 995.1094914 | 836.00558   |
| <a href="#">SERPINE1</a>     | 1.502424263      | 0.138799385      | 10.82443023    | 2.64E-27 | 4.45E-25  | Yes           | OK     | 24740.08147 | 37095.53281 | 12384.63012 | 36217.61414 | 44242.29604 | 30826.68826 | 14175.54962 | 10010.9423  | 12967.39843 |
| <a href="#">DNAH11</a>       | -2.148968684     | 0.198951777      | -10.80145509   | 3.39E-27 | 5.65E-25  | Yes           | OK     | 167.715964  | 52.69442831 | 282.7374996 | 54.72316415 | 57.85872768 | 45.50139311 | 295.8113986 | 322.7064978 | 229.6946024 |
| <a href="#">DISP2</a>        | 1.628452373      | 0.151236905      | 10.76755948    | 4.90E-27 | 8.07E-25  | Yes           | OK     | 326.5641047 | 501.8539902 | 151.2742192 | 446.9058406 | 520.7285491 | 537.9275807 | 135.371318  | 164.2869443 | 154.1643953 |
| <a href="#">PRKAA1</a>       | -1.044345104     | 0.097223289      | -10.74171745   | 6.48E-27 | 1.06E-24  | Yes           | OK     | 2054.503045 | 1325.932999 | 2783.073092 | 1349.838049 | 1374.144782 | 1253.816166 | 3012.429638 | 2641.499369 | 2695.290267 |
| <a href="#">RAB39A</a>       | 3.028015019      | 0.281951815      | 10.73947693    | 6.64E-27 | 1.07E-24  | Yes           | OK     | 127.9786578 | 243.6365314 | 12.32078417 | 152.3128069 | 389.5132203 | 189.0835669 | 5013752519  | 16.42869443 | 15.51990557 |
| <a href="#">NECAP1</a>       | 1.177492466      | 0.110417507      | 10.66400153    | 1.50E-26 | 2.39E-24  | Yes           | OK     | 1140.473812 | 1594.829181 | 686.1184437 | 1565.994547 | 1754.359279 | 1464.133716 | 728.665366  | 674.7499499 | 654.9400151 |
| <a href="#">YWHA8</a>        | -0.936993389     | 0.087967738      | -10.65155717   | 1.71E-26 | 2.70E-24  | Yes           | OK     | 6965.99007  | 4739.626654 | 9192.353486 | 4899.547297 | 4815.705888 | 4503.626776 | 9876.256836 | 8683.738486 | 9017.065136 |
| <a href="#">SPOPL</a>        | -1.397620589     | 0.131431132      | -10.63386252   | 2.07E-26 | 3.23E-24  | Yes           | OK     | 692.1455473 | 368.5555733 | 1015.735521 | 342.9318287 | 394.6791781 | 368.0557131 | 1113.053059 | 1070.212095 | 863.9414101 |
| <a href="#">CD82</a>         | -1.334363333     | 0.125964802      | -10.59314437   | 3.21E-26 | 4.94E-24  | Yes           | OK     | 1746.929646 | 964.0346145 | 2529.824678 | 894.7237339 | 1012.527734 | 984.8523753 | 2547.821905 | 2945.430216 | 2096.221912 |
| <a href="#">ARPC1A</a>       | -1.014587623     | 0.095797188      | -10.59099589   | 3.28E-26 | 4.96E-24  | Yes           | OK     | 2293.139858 | 1501.331847 | 3084.947868 | 1495.766487 | 1567.351605 | 1440.877448 | 3140.280327 | 3277.524539 | 2837.038738 |
| <a href="#">ZBED6CL</a>      | -1.429942012     | 0.135019149      | -10.59066084   | 3.29E-26 | 4.96E-24  | Yes           | OK     | 543.4408104 | 283.6308131 | 803.2508076 | 249.9024496 | 301.6919372 | 299.2980524 | 710.2816068 | 853.1186324 | 846.3521838 |
| <a href="#">MAPK11</a>       | 1.768778498      | 0.167156011      | 10.5816027     | 3.63E-26 | 5.41E-24  | Yes           | OK     | 245.0166999 | 387.4574681 | 102.5759317 | 362.9969889 | 358.5174733 | 440.8579421 | 104.5312775 | 91.53129756 | 111.7433201 |
| <a href="#">PURB</a>         | -1.171027099     | 0.110676412      | -10.58063845   | 3.66E-26 | 5.41E-24  | Yes           | OK     | 1226.820058 | 740.5643113 | 1713.075804 | 776.1568782 | 644.711537  | 800.8245187 | 1701.333355 | 1773.125521 | 1664.768537 |
| <a href="#">MIR4657</a>      | -1.171027099     | 0.110676412      | -10.58063845   | 3.66E-26 | 5.41E-24  | Yes           | OK     | 1226.820058 | 740.5643113 | 1713.075804 | 776.1568782 | 644.711537  | 800.8245187 | 1701.333355 | 1773.125521 | 1664.768537 |
| <a href="#">ACXL</a>         | -0.988231346     | 0.09349292       | -10.57011963   | 4.10E-26 | 5.98E-24  | Yes           | OK     | 18706.89481 | 12408.73336 | 25005.05625 | 12208.73792 | 12071.81025 | 12945.65191 | 22332.92497 | 27047.49843 | 25634.74536 |
| <a href="#">ICOSLG</a>       | -2.186478088     | 0.207835037      | -10.5202574    | 6.97E-26 | 1.01E-23  | Yes           | OK     | 126.0868964 | 37.73627836 | 214.4375145 | 44.69058406 | 36.1617048  | 32.35654621 | 211.4132312 | 231.1752002 | 200.724112  |
| <a href="#">LOC102723996</a> | -2.186478088     | 0.207835037      | -10.5202574    | 6.97E-26 | 1.01E-23  | Yes           | OK     | 126.0868964 | 37.73627836 | 214.4375145 | 44.69058406 | 36.1617048  | 32.35654621 | 211.4132312 | 231.1752002 | 200.724112  |
| <a href="#">ATAD2</a>        | -0.903781431     | 0.086853739      | -10.40578616   | 2.33E-25 | 3.34E-23  | Yes           | OK     | 6404.218888 | 4426.006191 | 8382.431585 | 4579.416787 | 4489.217353 | 4209.384433 | 8941.191991 | 8267.153734 | 7938.949029 |
| <a href="#">NNT</a>          | -0.900750723     | 0.086574214      | -1             |          |           |               |        |             |             |             |             |             |             |             |             |             |

| Gene Symbol               | Log2 Fold Change | LFC Standard Err | Wald Statistic | p Value  | FDR Adj p Va | Significance | Status | Base Mean   | KD          | Control     | siCAM1_1    | siCAM1_2    | siCAM1_3    | siCon_1     | siCon_2     | siCon_3     |
|---------------------------|------------------|------------------|----------------|----------|--------------|--------------|--------|-------------|-------------|-------------|-------------|-------------|-------------|-------------|-------------|-------------|
| <a href="#">ATP6V0A1</a>  | 1.236467966      | 0.119746349      | 10.32572578    | 5.39E-25 | 7.41E-23     | Yes          | OK     | 1186.222892 | 1681.651513 | 690.7942715 | 1684.561403 | 1580.783096 | 1779.610042 | 624.2121886 | 644.2395174 | 803.9311085 |
| <a href="#">MTR5010</a>   | 1.236467966      | 0.119746349      | 10.32572578    | 5.39E-25 | 7.41E-23     | Yes          | OK     | 1186.222892 | 1681.651513 | 690.7942715 | 1684.561403 | 1580.783096 | 1779.610042 | 624.2121886 | 644.2395174 | 803.9311085 |
| <a href="#">DPYSL2</a>    | -0.850038985     | 0.082931745      | -10.24986255   | 1.19E-24 | 1.58E-22     | Yes          | OK     | 4760.86747  | 3375.145231 | 6146.58971  | 3260.588531 | 3420.897274 | 3443.949887 | 6346.575063 | 5834.53348  | 6258.660586 |
| <a href="#">P4HA1</a>     | -1.264874803     | 0.123405002      | -10.24978556   | 1.19E-24 | 1.58E-22     | Yes          | OK     | 2290.150503 | 1312.174581 | 3268.126424 | 1384.496053 | 1227.43158  | 1324.59611  | 3924.096971 | 2950.124129 | 2930.158172 |
| <a href="#">PFKFB2</a>    | 0.928179553      | 0.09055652       | 10.2497264     | 1.19E-24 | 1.58E-22     | Yes          | OK     | 1662.398154 | 2189.552899 | 1135.243409 | 2248.209994 | 2219.295483 | 2101.15322  | 1113.053059 | 1135.926872 | 1156.750295 |
| <a href="#">USP22</a>     | -0.869353695     | 0.084872558      | -10.24304817   | 1.27E-24 | 1.68E-22     | Yes          | OK     | 5504.048526 | 3866.0043   | 7142.092753 | 3804.171961 | 3693.659848 | 4100.18109  | 7102.816068 | 6897.704706 | 7425.757485 |
| <a href="#">S100A4</a>    | -1.280105352     | 0.125017147      | -10.23943824   | 1.32E-24 | 1.73E-22     | Yes          | OK     | 5472.62246  | 3108.034491 | 7837.210428 | 2788.145213 | 3360.972163 | 3174.986097 | 7739.562638 | 9259.91627  | 6512.152377 |
| <a href="#">LRIG1</a>     | -1.264648058     | 0.123771165      | -10.21759066   | 1.65E-24 | 2.15E-22     | Yes          | OK     | 761.2116162 | 436.2921255 | 1086.131107 | 449.6419988 | 415.3430094 | 443.8913683 | 1221.684364 | 957.5581898 | 1079.150767 |
| <a href="#">ATP11C</a>    | -1.451784563     | 0.142151443      | -10.21294282   | 1.74E-24 | 2.23E-22     | Yes          | OK     | 1101.672289 | 565.7034752 | 1637.641102 | 649.3815479 | 482.5004612 | 565.2284166 | 1809.964659 | 1329.550771 | 1773.407876 |
| <a href="#">EPG5</a>      | 1.077545183      | 0.105554612      | 10.20841403    | 1.82E-24 | 2.32E-22     | Yes          | OK     | 6586.083911 | 9000.161179 | 4172.006644 | 8410.038277 | 10404.23907 | 8186.206191 | 4071.167045 | 4346.563156 | 4098.289731 |
| <a href="#">SCAMP1</a>    | -1.477279308     | 0.145020231      | -10.18671184   | 2.27E-24 | 2.87E-22     | Yes          | OK     | 767.6022579 | 387.7370575 | 1147.467458 | 422.2804167 | 415.3430094 | 325.5877462 | 1161.519333 | 1324.856858 | 956.0261831 |
| <a href="#">GFPT2</a>     | -1.091154531     | 0.107696393      | -10.13176483   | 3.99E-24 | 5.00E-22     | Yes          | OK     | 1029.231625 | 647.0889181 | 1411.374332 | 608.3391748 | 674.6740924 | 658.253487  | 1335.329421 | 1527.868582 | 1370.924992 |
| <a href="#">PRNP</a>      | -1.118031602     | 0.110402942      | -10.12682793   | 4.20E-24 | 5.21E-22     | Yes          | OK     | 13349.48093 | 8277.181541 | 18421.78032 | 7621.112661 | 9371.047502 | 7839.384461 | 19363.94785 | 19773.10723 | 16128.28587 |
| <a href="#">LRR8C8A</a>   | -0.893727373     | 0.088533248      | -10.09482196   | 5.82E-24 | 7.16E-22     | Yes          | OK     | 2003.41678  | 1390.769053 | 2616.064506 | 1341.629574 | 1444.401809 | 1386.275777 | 2628.877571 | 2540.580246 | 2678.735701 |
| <a href="#">ZNF268</a>    | -1.208447274     | 0.120291773      | -10.04596774   | 9.57E-24 | 1.17E-21     | Yes          | OK     | 649.5606873 | 383.5687425 | 915.552632  | 404.039362  | 399.845136  | 346.8217297 | 979.352992  | 893.0168903 | 874.2880138 |
| <a href="#">CAPG</a>      | -1.043591448     | 0.10409464       | -10.02541006   | 1.18E-23 | 1.42E-21     | Yes          | OK     | 4810.029265 | 3098.661288 | 6521.397241 | 2927.689282 | 3180.163639 | 3188.130944 | 6367.465699 | 7378.830757 | 5817.895268 |
| <a href="#">UBE2Q2</a>    | -1.205629296     | 0.120333637      | -10.01905476   | 1.26E-23 | 1.51E-21     | Yes          | OK     | 766.7705362 | 453.5733025 | 1079.96777  | 468.7951062 | 478.367695  | 1175.724966 | 979.8542751 | 1084.324069 |             |
| <a href="#">MIMP24</a>    | 2.013087141      | 0.201991652      | 9.966189804    | 2.14E-23 | 2.54E-21     | Yes          | OK     | 295.1174768 | 489.2272842 | 101.0076693 | 467.8830535 | 652.9770696 | 346.8217297 | 101.1106758 | 115.000861  | 86.91147119 |
| <a href="#">GPR68</a>     | -1.629036603     | 0.163626847      | -9.955802698   | 2.38E-23 | 2.80E-21     | Yes          | OK     | 912.4862932 | 416.7978422 | 1408.174744 | 467.8830535 | 278.9617228 | 503.5487504 | 1448.138852 | 1376.489898 | 1399.895482 |
| <a href="#">TWSG1</a>     | -1.051043374     | 0.105644935      | -9.948828857   | 2.55E-23 | 2.98E-21     | Yes          | OK     | 1836.349296 | 1178.519818 | 2494.178775 | 1219.414508 | 1214.00009  | 1102.144855 | 2768.427016 | 2424.405907 | 2289.703402 |
| <a href="#">SURF4</a>     | -0.921548223     | 0.092857495      | -9.82432781    | 3.26E-23 | 3.78E-21     | Yes          | OK     | 7121.396575 | 4875.567904 | 9367.225247 | 4885.866506 | 4666.926303 | 5073.910903 | 10203.822   | 8565.217191 | 9332.63655  |
| <a href="#">SGCE</a>      | -1.296352647     | 0.131727184      | -9.841193058   | 7.48E-23 | 8.59E-21     | Yes          | OK     | 536.5027313 | 301.0411145 | 771.9643482 | 342.9318287 | 285.1608722 | 275.0306428 | 830.6116672 | 739.2912495 | 745.9901277 |
| <a href="#">SMAAD2</a>    | -0.984231279     | 0.100194737      | -9.823183453   | 8.95E-23 | 1.02E-20     | Yes          | OK     | 2114.187664 | 1402.877505 | 2825.497823 | 1521.303963 | 1313.18648  | 1374.142072 | 3026.63527  | 2661.448498 | 2788.450971 |
| <a href="#">NSMAF</a>     | -1.125483315     | 0.114809083      | -9.803086026   | 1.09E-22 | 1.23E-20     | Yes          | OK     | 981.9142856 | 605.7587366 | 1358.069835 | 589.1860674 | 547.5915299 | 680.4986125 | 1426.412592 | 1356.540769 | 1291.256143 |
| <a href="#">SYP</a>       | 2.392252112      | 0.24457471       | 9.781273446    | 1.35E-22 | 1.52E-20     | Yes          | OK     | 158.7655231 | 281.1245006 | 36.40654568 | 239.8698695 | 419.4757757 | 184.0278566 | 36.76751847 | 35.20434521 | 37.24777337 |
| <a href="#">GPR157</a>    | 1.164342585      | 0.119472457      | 9.745698822    | 1.92E-22 | 2.14E-20     | Yes          | OK     | 865.740573  | 1209.039551 | 522.4415955 | 1254.072512 | 1084.851144 | 1288.194996 | 542.3208974 | 469.3912695 | 555.6126194 |
| <a href="#">ITM2B</a>     | -0.903802815     | 0.093075227      | -9.710455074   | 2.72E-22 | 3.00E-20     | Yes          | OK     | 1583.023251 | 1092.721561 | 2073.32494  | 1128.209234 | 1054.888589 | 1095.066861 | 2171.790466 | 2025.423328 | 2022.761026 |
| <a href="#">SEPT11</a>    | -0.782825885     | 0.080720716      | -9.697955163   | 3.08E-22 | 3.37E-20     | Yes          | OK     | 5096.019684 | 3724.651804 | 6467.387564 | 3910.882131 | 3602.73899  | 3660.33429  | 6563.837672 | 6448.262565 | 6390.062453 |
| <a href="#">TMEM65</a>    | -1.508705261     | 0.155715338      | -9.68886738    | 3.36E-22 | 3.65E-20     | Yes          | OK     | 381.0951981 | 187.8843285 | 574.3060677 | 199.7395491 | 184.9412903 | 178.9721462 | 628.3903157 | 462.3504005 | 632.1774869 |
| <a href="#">DNMT1</a>     | -0.871064672     | 0.090031801      | -9.675077673   | 3.85E-22 | 4.13E-20     | Yes          | OK     | 5901.676687 | 4137.750082 | 7665.603292 | 3976.549928 | 4251.583293 | 4185.117024 | 7014.239773 | 7829.446376 | 8153.123726 |
| <a href="#">B3GALNT1</a>  | -1.214802923     | 0.12564791       | -9.668309795   | 4.11E-22 | 4.36E-20     | Yes          | OK     | 566.0087489 | 332.5679235 | 799.4495743 | 327.4269322 | 326.4885348 | 343.7883035 | 889.1054466 | 775.6690729 | 733.5742033 |
| <a href="#">FAM102B</a>   | -1.098945312     | 0.113862803      | -9.651486575   | 4.84E-22 | 5.10E-20     | Yes          | OK     | 1340.571404 | 838.6560147 | 1842.486794 | 753.3555598 | 909.2085779 | 853.4039063 | 2011.350835 | 1673.379876 | 1842.730121 |
| <a href="#">RHOB</a>      | 1.271691467      | 0.131843387      | 9.645470241    | 5.14E-22 | 5.37E-20     | Yes          | OK     | 680.3587279 | 973.9233328 | 386.7941231 | 924.8214741 | 1134.444339 | 862.5041849 | 389.4014456 | 403.6764918 | 367.3044318 |
| <a href="#">SLC36A1</a>   | 1.460053821      | 0.152539838      | 9.571622989    | 1.05E-21 | 1.09E-19     | Yes          | OK     | 922.27334   | 1375.764784 | 468.7818963 | 1237.655563 | 1553.920115 | 1335.718673 | 349.2914255 | 530.4121346 | 526.642129  |
| <a href="#">PHACTR2</a>   | 0.885402478      | 0.092514322      | 9.57043683     | 1.06E-21 | 1.10E-19     | Yes          | OK     | 2295.077362 | 2992.62331  | 1597.531415 | 3080.002089 | 3121.27172  | 2776.596122 | 1636.990197 | 1538.429886 | 1617.17416  |
| <a href="#">EIF1B</a>     | -1.600370538     | 0.167425168      | -9.558721428   | 1.19E-21 | 1.22E-19     | Yes          | OK     | 242.1206599 | 111.9390639 | 372.3022559 | 116.7427502 | 126.049371  | 93.02507035 | 357.6476797 | 409.5438827 | 349.7152055 |
| <a href="#">SLC1A4</a>    | -1.697290898     | 0.177732034      | -9.549718539   | 1.30E-21 | 1.32E-19     | Yes          | OK     | 200.7165597 | 86.89610685 | 314.5370126 | 82.08474623 | 77.48936743 | 101.1142069 | 350.1270509 | 285.1551962 | 308.3287907 |
| <a href="#">FZD1</a>      | -1.180176542     | 0.123593837      | -9.548830062   | 1.31E-21 | 1.32E-19     | Yes          | OK     | 792.7360584 | 474.0238774 | 1111.448239 | 445.0817351 | 437.0400323 | 539.9498649 | 1018.627387 | 1138.273829 | 1177.443503 |
| <a href="#">CUL5</a>      | -0.917802764     | 0.096653502      | -9.495804553   | 2.19E-21 | 2.19E-19     | Yes          | OK     | 1758.073572 | 1204.761026 | 2311.386118 | 1247.688143 | 1256.360944 | 1110.233992 | 2389.888701 | 2213.179836 | 2331.089817 |
| <a href="#">ADRB2</a>     | 1.027610022      | 0.108545202      | 9.467116061    | 2.88E-21 | 2.86E-19     | Yes          | OK     | 1596.862077 | 2158.325348 | 1035.398806 | 2030.22939  | 2452.796777 | 1991.949876 | 1021.134263 | 1051.436444 | 1033.625711 |
| <a href="#">ZBTB47</a>    | 1.038372156      | 0.109982471      | 9.441251393    | 3.68E-21 | 3.64E-19     | Yes          | OK     | 1302.55277  | 1764.814726 | 840.2908131 | 1625.277975 | 1930.001845 | 1739.164359 | 778.8028912 | 907.0986284 | 834.9709197 |
| <a href="#">KRTAP2-3</a>  | 2.819865504      | 0.298973438      | 9.431826199    | 4.03E-21 | 3.95E-19     | Yes          | OK     | 61.40909804 | 118.0962708 | 4.721925316 | 96.67759    | 178.7421409 | 78.86908139 | 2.506876259 | 2.346956348 | 9.311943342 |
| <a href="#">FAM171B</a>   | -1.339719652     | 0.142174029      | -9.423096872   | 4.38E-21 | 4.26E-19     | Yes          | OK     | 488.6358133 | 266.5074641 | 710.7641624 | 280.0001899 | 227.3021445 | 292.220058  | 782.9810183 | 718.1686424 | 631.1428265 |
| <a href="#">MAPK6</a>     | 0.948095232      | 0.10090205       | 9.39619397     | 5.66E-21 | 5.47E-19     | Yes          | OK     | 2502.97249  | 3317.633284 | 1688.311697 | 3479.481187 | 3320.677692 | 3152.740971 | 1858.430934 | 1531.389017 | 1675.115141 |
| <a href="#">HIST1H2BC</a> | -0.758711028     | 0.080764884      | -9.394070657   | 5.77E-21 | 5.54E-19     | Yes          | OK     | 4520.894241 | 3340.485973 | 5701.302509 | 3258.764425 | 3324.810459 | 3437.883035 | 5914.556721 | 5602.184802 | 5587.166005 |
| <a href="#">WDR17</a>     | 1.737382559      | 0.188912627      | 9.38866973     | 6.08E-21 | 5.79E-19     | Yes          | OK     | 147.5026363 | 235.2421011 | 59.76317152 | 231.6613949 | 229.3685276 | 244.6963807 | 63.5075319  | 51.63303965 | 64.14894302 |
| <a href="#">COL4A1</a>    | 1.030225762      | 0.109960303      | 9.369069899    | 7.32E-21 | 6.93E-19     | Yes          | OK     | 2491.14733  | 3369.598647 | 1612.696013 | 3293.422429 | 3850.704966 | 2964.668546 | 1545.907027 | 1634.655096 | 1657.525915 |
| <a href="#">MIR4523</a>   | -0.743648809     | 0.079432709      | -9.361997289   | 7.82E-21 | 7.36E-19     | Yes          | OK     | 3871.919681 | 2880.340405 | 4863.498957 | 2910.36028  | 2867.106595 | 2863.55434  | 4936.039355 | 4933.302243 | 4721.155274 |
| <a href="#">TAOK1</a>     | -0.743648809     | 0.079432709      | -9.361997289   | 7.82E-21 | 7.36E-19     | Yes          | OK     | 3871.919681 | 2880.340405 | 4863.498957 | 2910.36028  | 2867.106595 | 2863.55434  | 4936.039355 | 4933.302243 | 4721.15527  |

## KO\_vs\_Control\_Differential\_Expr

| Gene Symbol               | Log2 Fold Change | LFC Standard Err | Wald Statistic | p Value  | FDR Adj p | Va Significa | Status | Base Mean   | KD          | Control     | siICAM1_1   | siICAM1_2   | siICAM1_3   | siCon_1     | siCon_2     | siCon_3     |
|---------------------------|------------------|------------------|----------------|----------|-----------|--------------|--------|-------------|-------------|-------------|-------------|-------------|-------------|-------------|-------------|-------------|
| <a href="#">SDC1</a>      | -0.89795996      | 0.096342461      | -9.320500572   | 1.16E-20 | 1.06E-18  | Yes          | OK     | 2707.912788 | 1872.969412 | 3542.856165 | 1854.203212 | 1716.131191 | 2048.573832 | 3671.738094 | 3444.15844  | 3512.671961 |
| <a href="#">FZD7</a>      | -1.042217025     | 0.112094164      | -9.297692141   | 1.44E-20 | 1.31E-18  | Yes          | OK     | 1080.561479 | 695.0165916 | 1466.106365 | 624.7561241 | 767.6613334 | 692.6323173 | 1376.725066 | 1511.439888 | 1510.604142 |
| <a href="#">GAN</a>       | 0.978820264      | 0.105567474      | 9.271987159    | 1.83E-20 | 1.65E-18  | Yes          | OK     | 872.9469584 | 1166.444711 | 579.4492054 | 1193.877031 | 1139.610297 | 1165.846806 | 612.5134327 | 543.3203945 | 582.5137891 |
| <a href="#">MIR4720</a>   | 0.978820264      | 0.105567474      | 9.271987159    | 1.83E-20 | 1.65E-18  | Yes          | OK     | 872.9469584 | 1166.444711 | 579.4492054 | 1193.877031 | 1139.610297 | 1165.846806 | 612.5134327 | 543.3203945 | 582.5137891 |
| <a href="#">PNMA2</a>     | -1.373040475     | 0.148377344      | -9.253707085   | 2.17E-20 | 1.95E-18  | Yes          | OK     | 562.6733061 | 300.1746881 | 825.171924  | 275.4399262 | 340.9532167 | 284.1309214 | 753.7341286 | 989.2421005 | 732.5395429 |
| <a href="#">MDGA1</a>     | -1.62413319      | 0.175720434      | -9.242711023   | 2.40E-20 | 2.15E-18  | Yes          | OK     | 211.6860002 | 95.61412755 | 327.7578728 | 102.1499064 | 78.522559   | 106.1699173 | 295.8113986 | 327.4004105 | 360.0618092 |
| <a href="#">KATNA1</a>    | -1.420371652     | 0.15369913       | -9.241247205   | 2.44E-20 | 2.16E-18  | Yes          | OK     | 295.3249999 | 152.9789781 | 437.6710217 | 168.7297561 | 142.5804361 | 147.6267421 | 479.6489909 | 441.2277934 | 392.1362807 |
| <a href="#">SDPR</a>      | -1.757399113     | 0.190668396      | -9.217044598   | 3.05E-20 | 2.69E-18  | Yes          | OK     | 555.0297155 | 227.5781276 | 882.4813035 | 261.7591352 | 158.0783096 | 262.896938  | 1062.079909 | 640.7190829 | 944.644919  |
| <a href="#">RHOD</a>      | 1.274608875      | 0.138929781      | 9.174482715    | 4.54E-20 | 3.97E-18  | Yes          | OK     | 556.1286293 | 797.1776516 | 315.079607  | 742.410927  | 897.8434707 | 751.2785573 | 275.7563885 | 359.0843212 | 310.3981114 |
| <a href="#">MGLL</a>      | 0.942877691      | 0.102819506      | 9.170221909    | 4.72E-20 | 4.11E-18  | Yes          | OK     | 1435.601879 | 1900.522134 | 970.6816239 | 1980.06649  | 1871.109926 | 1850.389986 | 947.599226  | 897.710803  | 1066.734843 |
| <a href="#">AGPAT5</a>    | 0.989259603      | 0.108039866      | 9.156431233    | 5.36E-20 | 4.64E-18  | Yes          | OK     | 1896.410087 | 2540.395485 | 1252.42469  | 2684.171202 | 2729.692117 | 2207.323137 | 1301.068779 | 1206.335563 | 1249.869729 |
| <a href="#">TBCC</a>      | -0.953059872     | 0.104480484      | -9.121893749   | 7.38E-20 | 6.35E-18  | Yes          | OK     | 1147.487425 | 771.9370562 | 1523.037795 | 756.091718  | 630.6860189 | 729.0334318 | 1545.907027 | 1591.236404 | 1431.969954 |
| <a href="#">NQO1</a>      | -1.090542776     | 0.120032154      | -9.085422029   | 1.03E-19 | 8.83E-18  | Yes          | OK     | 6183.563936 | 3873.973907 | 8493.153966 | 3201.305103 | 4019.115191 | 4401.501427 | 9351.484073 | 7834.140288 | 8293.837537 |
| <a href="#">CCDC115</a>   | -1.624416033     | 0.178817028      | -9.084235709   | 1.04E-19 | 8.87E-18  | Yes          | OK     | 224.0375412 | 100.9255258 | 347.1495565 | 113.0945392 | 75.4229843  | 114.2590538 | 371.8533118 | 325.0534541 | 344.5419037 |
| <a href="#">RAPGEF2</a>   | 0.978300623      | 0.107882877      | 9.068173304    | 1.21E-19 | 1.02E-17  | Yes          | OK     | 2355.003884 | 3146.095399 | 1563.912369 | 2986.060657 | 3606.871756 | 2845.353782 | 1535.879522 | 1601.797707 | 1554.059878 |
| <a href="#">TNFRSF10A</a> | 0.872616798      | 0.096492673      | 9.04334776     | 1.52E-19 | 1.27E-17  | Yes          | OK     | 1319.01573  | 1715.252456 | 922.7790036 | 1720.13146  | 1794.65375  | 1630.972157 | 950.1061023 | 921.1803664 | 897.050542  |
| <a href="#">TUBB6</a>     | -0.801957419     | 0.088802642      | -9.030783378   | 1.70E-19 | 1.42E-17  | Yes          | OK     | 3682.48085  | 2665.2674   | 4699.6943   | 2706.97252  | 2774.119354 | 2514.710326 | 4903.449963 | 4763.147907 | 4432.485031 |
| <a href="#">ZNHIT6</a>    | 0.95578897       | 0.106021807      | 9.015022425    | 1.97E-19 | 1.63E-17  | Yes          | OK     | 1275.744233 | 1695.060345 | 856.4281205 | 1821.369313 | 1651.040122 | 1612.7716   | 874.8998145 | 783.8834201 | 910.5011268 |
| <a href="#">ANKRD46</a>   | 1.44168298       | 0.161014242      | 8.953760624    | 3.44E-19 | 2.83E-17  | Yes          | OK     | 591.0402794 | 881.495715  | 300.5848438 | 966.7759    | 768.6945249 | 909.0167201 | 312.523907  | 222.960853  | 366.2697715 |
| <a href="#">TMTC4</a>     | -1.566131777     | 0.17513844       | -8.942250329   | 3.81E-19 | 3.12E-17  | Yes          | OK     | 226.6331405 | 106.1449111 | 347.1213699 | 89.38116811 | 119.8502216 | 109.2033435 | 313.3595324 | 398.9825791 | 329.0219981 |
| <a href="#">ATP6V1B2</a>  | 0.948878394      | 0.106179514      | 8.936548658    | 4.02E-19 | 3.27E-17  | Yes          | OK     | 2703.389729 | 3586.149464 | 1820.629995 | 3835.181754 | 3315.511735 | 3607.754902 | 1961.21286  | 1604.144664 | 1896.532461 |
| <a href="#">UCN2</a>      | -1.882916509     | 0.211292923      | -8.91140357    | 5.04E-19 | 4.08E-17  | Yes          | OK     | 131.7726576 | 48.0423362  | 215.5029791 | 41.95442585 | 49.59319516 | 52.57938759 | 175.4813381 | 255.8182419 | 215.2093572 |
| <a href="#">TET3</a>      | 1.370607502      | 0.153861269      | 8.908073527    | 5.19E-19 | 4.17E-17  | Yes          | OK     | 766.8269258 | 1124.86681  | 408.7870418 | 985.0169547 | 1196.435833 | 1193.147641 | 311.6882164 | 420.1051862 | 494.5676575 |
| <a href="#">PPP2R1B</a>   | 0.87721521       | 0.098478197      | 8.907709862    | 5.21E-19 | 4.17E-17  | Yes          | OK     | 2733.210403 | 3559.508854 | 1906.911952 | 3745.800586 | 3427.096424 | 3505.629553 | 2105.776058 | 1774.298999 | 1840.660801 |
| <a href="#">LGALS1</a>    | -1.066118653     | 0.119772177      | -8.90122131    | 5.52E-19 | 4.40E-17  | Yes          | OK     | 7506.893741 | 4759.69052  | 10254.09696 | 4359.612077 | 5361.231035 | 4558.228447 | 10293.23392 | 11758.2513  | 8710.805666 |
| <a href="#">SH2D5</a>     | 0.967606263      | 0.108874284      | 8.887371963    | 6.26E-19 | 4.95E-17  | Yes          | OK     | 929.9091318 | 1239.332308 | 620.4859554 | 1211.206033 | 1239.829879 | 1266.961013 | 593.294048  | 583.2186524 | 684.9451658 |
| <a href="#">TSPAN9</a>    | -0.995906984     | 0.112346587      | -8.864594917   | 7.68E-19 | 6.04E-17  | Yes          | OK     | 866.3504594 | 569.8159572 | 1162.884962 | 536.2870087 | 579.6204684 | 593.5403945 | 1186.588096 | 1241.539908 | 1060.526881 |
| <a href="#">ISG20L1</a>   | 0.972551476      | 0.10049152       | 8.837428134    | 9.79E-19 | 7.67E-17  | Yes          | OK     | 726.1892225 | 969.3498566 | 483.0285884 | 994.1374821 | 939.1711333 | 974.7409546 | 491.3477468 | 451.789069  | 505.9489216 |
| <a href="#">FAM222B</a>   | 1.545542093      | 0.174970155      | 8.833175519    | 1.02E-18 | 7.92E-17  | Yes          | OK     | 235.1476591 | 358.2925695 | 112.0027486 | 345.6679869 | 339.9200251 | 389.2896966 | 86.90504365 | 129.0825991 | 120.0206031 |
| <a href="#">FAM175A</a>   | -1.350491113     | 0.152964844      | -8.828767966   | 1.06E-18 | 8.19E-17  | Yes          | OK     | 244.5192941 | 131.5924489 | 357.4461393 | 141.3681741 | 123.9829879 | 129.4261848 | 360.9901813 | 354.3904085 | 356.9578281 |
| <a href="#">TNFSF10</a>   | -1.54481133      | 0.175462955      | -8.804202173   | 1.32E-18 | 1.01E-16  | Yes          | OK     | 932.7116144 | 442.0219951 | 1423.401234 | 589.1860674 | 320.2893854 | 416.5905325 | 1701.333355 | 1240.36643  | 1328.503917 |
| <a href="#">MGAT4A</a>    | -1.474252082     | 0.167852326      | -8.783030418   | 1.59E-18 | 1.22E-16  | Yes          | OK     | 418.3331897 | 208.0905806 | 628.5757989 | 225.2770258 | 170.4766084 | 228.5181076 | 776.296015  | 562.0960453 | 547.3353364 |
| <a href="#">WWC3</a>      | -0.888819962     | 0.101417361      | -8.763982341   | 1.88E-18 | 1.44E-16  | Yes          | OK     | 1982.195222 | 1374.93437  | 2589.456074 | 1293.290779 | 1436.136276 | 1395.376055 | 2352.285557 | 2787.010663 | 2629.072004 |
| <a href="#">PPP1R15B</a>  | 0.845054291      | 0.096589313      | 8.748941905    | 2.15E-18 | 1.63E-16  | Yes          | OK     | 3751.542401 | 4844.40762  | 2658.677183 | 4851.208502 | 5321.969755 | 4360.044602 | 2626.370694 | 2697.826322 | 2651.834532 |
| <a href="#">SLC26A2</a>   | -0.841307326     | 0.096322927      | -8.734237593   | 2.45E-18 | 1.85E-16  | Yes          | OK     | 1361.809278 | 966.92686   | 1756.691697 | 927.5576324 | 1017.693692 | 955.5292553 | 1786.567147 | 1800.115519 | 1683.392424 |
| <a href="#">BNIP3</a>     | -1.79197765      | 0.135219989      | -8.720587628   | 2.77E-18 | 2.07E-16  | Yes          | OK     | 1584.63467  | 943.3874304 | 2225.88191  | 976.8084801 | 944.3370911 | 909.0167201 | 2527.766895 | 2430.273298 | 1719.605537 |
| <a href="#">EMP2</a>      | -1.237583316     | 0.142036272      | -8.71314979    | 2.96E-18 | 2.20E-16  | Yes          | OK     | 427.2149892 | 246.2500901 | 608.1798884 | 207.9480238 | 282.0612975 | 248.740949  | 641.7603224 | 596.1269123 | 586.6524306 |
| <a href="#">ORA13</a>     | -1.170615067     | 0.134413378      | -8.709066649   | 3.06E-18 | 2.26E-16  | Yes          | OK     | 400.4550917 | 239.4212184 | 561.4889651 | 245.3421859 | 223.1693782 | 249.7520911 | 570.7321617 | 598.4738686 | 515.2608649 |
| <a href="#">RNF130</a>    | -1.050600022     | 0.120635692      | -8.708865566   | 3.07E-18 | 2.26E-16  | Yes          | OK     | 606.2779887 | 387.0160781 | 825.5398994 | 397.6549928 | 378.1481131 | 385.2451283 | 818.9129114 | 902.4047157 | 755.3020711 |
| <a href="#">TCAF1</a>     | -1.2528625       | 0.143974263      | -8.701989327   | 3.26E-18 | 2.39E-16  | Yes          | OK     | 469.9123566 | 267.9574107 | 671.8673026 | 246.2542387 | 259.331083  | 298.2869104 | 641.7603224 | 776.8425511 | 596.9990343 |
| <a href="#">PIA1</a>      | -1.204874471     | 0.138619567      | -8.691950899   | 3.56E-18 | 2.60E-16  | Yes          | OK     | 446.8184011 | 261.9869798 | 631.6498225 | 274.5278735 | 227.3021445 | 284.1309214 | 664.3222087 | 659.4947337 | 571.132525  |
| <a href="#">TFPI2</a>     | -0.942059432     | 0.108396655      | -8.690853331   | 3.60E-18 | 2.61E-16  | Yes          | OK     | 1401.512298 | 947.2847886 | 1855.739807 | 887.427312  | 989.79752   | 964.6295339 | 2066.501663 | 1753.176392 | 1747.541367 |
| <a href="#">TGFB2</a>     | 0.795747365      | 0.091566398      | 8.690386208    | 3.61E-18 | 2.61E-16  | Yes          | OK     | 4847.991654 | 6178.19972  | 3517.783587 | 6315.053143 | 6059.668533 | 6159.877485 | 3173.705344 | 3703.497117 | 3676.148299 |
| <a href="#">OTULIN</a>    | -0.80640961      | 0.092845715      | -8.685480105   | 3.77E-18 | 2.71E-16  | Yes          | OK     | 1625.968168 | 1173.541029 | 2078.395307 | 1161.043133 | 1211.933707 | 1147.646248 | 2091.570426 | 2167.414187 | 1976.201309 |
| <a href="#">ASAP3</a>     | -1.194697595     | 0.137711961      | -8.675336468   | 4.12E-18 | 2.95E-16  | Yes          | OK     | 763.220997  | 450.2052966 | 1076.236697 | 412.2478366 | 427.7413082 | 510.6267449 | 1096.340551 | 1223.937735 | 908.431806  |
| <a href="#">TTC30A</a>    | -1.993642847     | 0.229834124      | -8.67426826    | 4.16E-18 | 2.96E-16  | Yes          | OK     | 100.1489837 | 32.43949066 | 167.8584766 | 31.92184575 | 32.02893854 | 33.36768828 | 194.7007228 | 179.5421606 | 129.3325464 |
| <a href="#">ABHD5</a>     | 1.23228785       | 0.142087648      | 8.672314619    | 4.23E-18 | 3.00E-16  | Yes          | OK     | 2855.677356 | 4062.492    | 1648.862713 | 3894.465182 | 4957.253133 | 3335.757686 | 1536.715147 | 1938.585943 | 1471.287048 |
| <a href="#">MTMR9</a>     | 0.940773534      | 0.108615888      | 8.661472596    | 4.66E-18 | 3.28E-16  | Yes          | OK     | 1010.076657 | 1338.04933  | 682.1039848 | 1348.925996 | 1414.439254 | 1250.782739 | 734.514744  | 637.1986484 | 674.5985621 |
| <a href="#">CCNG2</a>     | -1.542887219     | 0.178748745      | -8.631597482   | 6.05E-18 | 4.24E-16  | Yes          | OK     | 249.7297035 | 118.196923  | 381.262484  | 114.9186447 | 143.6136276 | 96.05849656 | 421.990837  | 398.9825791 | 322.8140359 |
| <a href="#">DDAH2</a>     | -                |                  |                |          |           |              |        |             |             |             |             |             |             |             |             |             |

## KO\_vs\_Control\_Differential\_Expr

| Gene Symbol                 | Log2 Fold Change | LFC Standard Err | Wald Statistic | p Value  | FDR Adj p | Va Significa | Status | Base Mean   | KD          | Control     | siCAM1_1    | siCAM1_2    | siCAM1_3    | siCon_1     | siCon_2     | siCon_3     |
|-----------------------------|------------------|------------------|----------------|----------|-----------|--------------|--------|-------------|-------------|-------------|-------------|-------------|-------------|-------------|-------------|-------------|
| <a href="#">C2CD2</a>       | 0.923261605      | 0.107794974      | 8.564978241    | 1.08E-17 | 7.43E-16  | Yes          | OK     | 1356.901353 | 1788.510583 | 925.2921222 | 1617.981553 | 1907.27163  | 1840.278566 | 866.5435603 | 991.5890569 | 917.7437494 |
| <a href="#">C3orf14</a>     | 1.184070954      | 0.138470117      | 8.551093748    | 1.22E-17 | 8.33E-16  | Yes          | OK     | 819.8456658 | 1154.093188 | 485.5981433 | 1120.912812 | 1353.480951 | 987.8858015 | 546.4990245 | 470.5647477 | 439.7306578 |
| <a href="#">CPEB3</a>       | 1.683323938      | 0.197035669      | 8.543244717    | 1.31E-17 | 8.88E-16  | Yes          | OK     | 133.8166916 | 210.6434977 | 56.9898856  | 190.6190218 | 210.7710794 | 230.5403917 | 50.97315061 | 61.02086504 | 58.97564117 |
| <a href="#">PPIF</a>        | 0.826425074      | 0.096751431      | 8.541734924    | 1.32E-17 | 8.95E-16  | Yes          | OK     | 3976.142462 | 5110.719143 | 2841.56578  | 5340.068768 | 4737.183329 | 5254.905333 | 2831.934548 | 2615.682849 | 3077.079944 |
| <a href="#">RAD23B</a>      | -0.841298466     | 0.098625589      | -8.530225049   | 1.46E-17 | 9.84E-16  | Yes          | OK     | 4444.741768 | 3154.267451 | 5735.216085 | 3303.455009 | 2960.093836 | 3199.253507 | 6184.463732 | 5133.96701  | 5887.217513 |
| <a href="#">SLC25A1</a>     | -0.93067748      | 0.109160744      | -8.525752415   | 1.52E-17 | 1.02E-15  | Yes          | OK     | 1005.96344  | 683.1562222 | 1328.770658 | 674.0069718 | 677.7736671 | 697.6880277 | 1407.193207 | 1388.22468  | 1190.894087 |
| <a href="#">IRF2BPL</a>     | -1.298044984     | 0.152254402      | -8.525500524   | 1.52E-17 | 1.02E-15  | Yes          | OK     | 700.2523053 | 388.0786467 | 1012.425964 | 375.7657272 | 321.322577  | 467.1476359 | 944.2567243 | 900.0577593 | 1192.963408 |
| <a href="#">SFXN3</a>       | 0.729196358      | 0.085581548      | 8.52048576     | 1.59E-17 | 1.06E-15  | Yes          | OK     | 2416.158268 | 3025.42684  | 1806.889696 | 3030.751241 | 2980.757667 | 3064.771611 | 1886.842198 | 1753.176392 | 1780.650499 |
| <a href="#">C5</a>          | -1.835061493     | 0.215417621      | -8.518622946   | 1.61E-17 | 1.07E-15  | Yes          | OK     | 151.2067194 | 56.48556078 | 245.927878  | 57.45932236 | 36.1617048  | 75.83565518 | 267.4001343 | 224.1343312 | 246.2491684 |
| <a href="#">RASSF4</a>      | -1.10908         | 0.13052354       | -8.497164604   | 1.94E-17 | 1.27E-15  | Yes          | OK     | 437.9027029 | 270.6074674 | 605.1979384 | 286.3845591 | 267.5966155 | 257.8412276 | 634.2396936 | 627.810823  | 553.5432987 |
| <a href="#">KDM3A</a>       | -0.815219086     | 0.096098514      | -8.48316017    | 2.19E-17 | 1.43E-15  | Yes          | OK     | 1220.756615 | 877.2465097 | 1564.26672  | 830.8800424 | 900.9430454 | 899.9164415 | 1577.660793 | 1572.460753 | 1542.678614 |
| <a href="#">SFTA1P</a>      | 1.407148138      | 0.165931659      | 8.480287284    | 2.25E-17 | 1.46E-15  | Yes          | OK     | 398.5836912 | 591.4782608 | 205.6891217 | 588.2740146 | 714.9685635 | 471.1922042 | 226.4544888 | 179.5421606 | 211.0707158 |
| <a href="#">SLC04A1-AS1</a> | -1.823968558     | 0.21516499       | -8.477069437   | 2.31E-17 | 1.49E-15  | Yes          | OK     | 104.8465382 | 39.40015483 | 170.2929216 | 37.39416217 | 43.39404576 | 37.41225656 | 149.5705511 | 185.409551  | 175.8922631 |
| <a href="#">TNFAIP2</a>     | -1.030009454     | 0.122023181      | -8.441096596   | 3.14E-17 | 2.02E-15  | Yes          | OK     | 3749.582232 | 2417.563186 | 5081.601278 | 2373.161219 | 2310.216341 | 2569.311997 | 4777.270525 | 6112.647807 | 4354.885503 |
| <a href="#">NLRP3</a>       | 1.448939922      | 0.171678644      | 8.439837851    | 3.18E-17 | 2.03E-15  | Yes          | OK     | 314.8223724 | 470.9254589 | 158.719286  | 468.7951062 | 548.6247214 | 395.356549  | 132.0288163 | 188.929986  | 155.1990557 |
| <a href="#">DCAF12</a>      | 0.771550872      | 0.091428171      | 8.438874595    | 3.20E-17 | 2.04E-15  | Yes          | OK     | 1750.574439 | 2217.632884 | 1283.515995 | 2228.144834 | 2274.054636 | 2150.699181 | 1301.904404 | 1218.070344 | 1330.573238 |
| <a href="#">PKP2</a>        | 0.92710418       | 0.109998437      | 8.428339548    | 3.51E-17 | 2.22E-15  | Yes          | OK     | 794.759533  | 1048.881941 | 540.6371246 | 1057.069121 | 1115.846891 | 973.7298125 | 523.9371382 | 552.7082199 | 545.2660157 |
| <a href="#">REV3L</a>       | 0.797027078      | 0.094640421      | 8.421634951    | 3.71E-17 | 2.34E-15  | Yes          | OK     | 1610.860298 | 2054.171445 | 1167.549151 | 2030.22939  | 2167.635905 | 1964.64904  | 1116.395561 | 1192.253825 | 1193.998069 |
| <a href="#">NFIA</a>        | -1.324587881     | 0.157601414      | -8.404670044   | 4.29E-17 | 2.70E-15  | Yes          | OK     | 280.6202186 | 152.5366921 | 408.703745  | 153.2248596 | 143.6136276 | 160.771589  | 349.2914255 | 441.2277934 | 435.5920163 |
| <a href="#">TM20D2</a>      | -0.992687459     | 0.118356864      | -8.387240323   | 4.98E-17 | 3.11E-15  | Yes          | OK     | 575.1611291 | 378.449796  | 771.8724621 | 356.6126197 | 386.4136456 | 392.3231228 | 816.4060351 | 734.5973368 | 764.6140144 |
| <a href="#">PMEM2G3</a>     | -0.869795787     | 0.103919756      | -8.369879071   | 7.77E-17 | 3.59E-15  | Yes          | OK     | 1656.079613 | 1158.772692 | 2153.386534 | 1199.349348 | 1131.344765 | 1145.623964 | 2394.902453 | 2073.535933 | 1991.721215 |
| <a href="#">TULP3</a>       | -1.190484895     | 0.14243393       | -8.358155202   | 6.37E-17 | 3.95E-15  | Yes          | OK     | 351.8767205 | 207.51116   | 496.242281  | 197.0033909 | 229.3685276 | 196.1615614 | 489.676496  | 538.6264818 | 460.4238652 |
| <a href="#">TBCLD9</a>      | 0.784377339      | 0.093860825      | 8.356812715    | 6.44E-17 | 3.98E-15  | Yes          | OK     | 2207.951603 | 2806.175703 | 1609.727503 | 2865.669696 | 2921.865748 | 2630.991664 | 1568.468913 | 1709.757699 | 1550.955897 |
| <a href="#">RABL3</a>       | -1.174238396     | 0.140555257      | -8.35426303    | 6.58E-17 | 4.05E-15  | Yes          | OK     | 309.5889834 | 184.3652065 | 434.8127602 | 176.9382308 | 190.1072481 | 186.0501407 | 447.895225  | 444.7482279 | 411.7948279 |
| <a href="#">PPME1</a>       | 0.742363477      | 0.089097258      | 8.332057489    | 7.94E-17 | 4.84E-15  | Yes          | OK     | 2601.952522 | 3269.985295 | 1933.919749 | 3045.344085 | 3414.698125 | 3349.913675 | 1921.10284  | 1956.188116 | 1924.468291 |
| <a href="#">TMEM200B</a>    | -1.279713908     | 0.153591151      | -8.331950747   | 7.95E-17 | 4.84E-15  | Yes          | OK     | 292.5883513 | 163.5931953 | 421.5835072 | 155.0489651 | 143.6136276 | 192.1169931 | 416.9770845 | 431.839968  | 415.9334693 |
| <a href="#">SUCC</a>        | 0.82805166       | 0.099419399      | 8.328874118    | 8.16E-17 | 4.95E-15  | Yes          | OK     | 3503.731217 | 4506.883984 | 2500.57845  | 4635.052004 | 4865.299083 | 4020.300867 | 2637.233825 | 2453.742861 | 2410.758665 |
| <a href="#">ROR1</a>        | 0.744964505      | 0.089452183      | 8.328075199    | 8.22E-17 | 4.96E-15  | Yes          | OK     | 2671.158907 | 3359.357993 | 1982.959822 | 3375.507175 | 3280.059822 | 3494.506991 | 1953.692231 | 1901.034642 | 2094.152592 |
| <a href="#">CDC25A</a>      | 0.8568482        | 0.103071596      | 8.31313604     | 9.32E-17 | 5.61E-15  | Yes          | OK     | 2362.089653 | 3061.297784 | 1662.881522 | 2990.620921 | 3412.631742 | 2780.64069  | 1601.058304 | 1741.44161  | 1646.144651 |
| <a href="#">CX3CL1</a>      | -2.27698953      | 0.274128392      | -8.306288563   | 9.87E-17 | 5.91E-15  | Yes          | OK     | 98.48496872 | 20.72038454 | 176.2495529 | 18.24105472 | 20.66383132 | 23.25626759 | 120.3300604 | 286.3286744 | 122.0899238 |
| <a href="#">NR6A1</a>       | 1.321822839      | 0.159368617      | 8.294122533    | 1.09E-16 | 6.52E-15  | Yes          | OK     | 246.5947541 | 359.0355695 | 134.1539388 | 316.4822993 | 390.5464119 | 370.0779973 | 133.7000672 | 129.0825991 | 139.6791501 |
| <a href="#">ZDHHC9</a>      | -1.115009807     | 0.13448802       | -8.290774217   | 1.13E-16 | 6.67E-15  | Yes          | OK     | 647.0444289 | 397.7367634 | 896.3520945 | 435.049155  | 369.8825805 | 388.2785545 | 782.1801083 | 876.5881958 | 1029.487069 |
| <a href="#">LBHD1</a>       | -0.858448502     | 0.103547471      | -8.29038596    | 1.13E-16 | 6.67E-15  | Yes          | OK     | 1139.930774 | 801.7141673 | 1478.147381 | 849.1210971 | 752.1634599 | 803.8579449 | 1568.468913 | 1451.592501 | 1414.380728 |
| <a href="#">TNFAIP1</a>     | 0.843870384      | 0.101915116      | 8.280129754    | 1.23E-16 | 7.24E-15  | Yes          | OK     | 2005.565081 | 2590.357388 | 1420.772774 | 2570.16461  | 2823.712549 | 2377.195004 | 1392.987575 | 1514.960322 | 1354.370426 |
| <a href="#">CCND8P1</a>     | -0.993696597     | 0.12014148       | -8.271031371   | 1.33E-16 | 7.79E-15  | Yes          | OK     | 583.209519  | 382.9319083 | 783.4871296 | 393.0947291 | 396.7455613 | 358.9554345 | 795.5153996 | 829.6490689 | 725.2969203 |
| <a href="#">NDRG1</a>       | -1.0594194       | 0.128102899      | -8.270065765   | 1.34E-16 | 7.82E-15  | Yes          | OK     | 3605.655575 | 2286.956079 | 4924.355071 | 2250.946152 | 1901.072481 | 2708.849603 | 5505.100265 | 4447.482279 | 4820.48267  |
| <a href="#">MFSD6</a>       | -1.370901898     | 0.166034951      | -8.256706757   | 1.50E-16 | 8.71E-15  | Yes          | OK     | 557.2184038 | 294.0638856 | 820.3729219 | 225.2770258 | 363.6834312 | 293.2312    | 787.1591454 | 961.0786243 | 712.8809959 |
| <a href="#">ATG13</a>       | -0.816935194     | 0.098964904      | -8.254797053   | 1.52E-16 | 8.81E-15  | Yes          | OK     | 1019.20303  | 731.2394783 | 1307.166581 | 757.9158235 | 709.8026057 | 726.0000056 | 1316.945662 | 1270.876862 | 1333.677219 |
| <a href="#">ATP9B</a>       | -0.869313081     | 0.105398152      | -8.247896835   | 1.61E-16 | 9.30E-15  | Yes          | OK     | 895.6049851 | 626.5044676 | 1164.705503 | 621.1079131 | 594.0851503 | 664.3203394 | 1168.204337 | 1119.498178 | 1206.413993 |
| <a href="#">HIP1</a>        | -1.338999569     | 0.162407866      | -8.244671925   | 1.66E-16 | 9.51E-15  | Yes          | OK     | 490.9502146 | 264.0887937 | 717.8116354 | 237.1337113 | 237.6340601 | 317.4986097 | 614.1846835 | 871.8942831 | 667.3559395 |
| <a href="#">MORF4L2</a>     | -0.859832855     | 0.104418083      | -8.234520579   | 1.80E-16 | 1.03E-14  | Yes          | OK     | 5666.89285  | 3982.209532 | 7351.576169 | 4379.677238 | 3722.589211 | 3844.362147 | 8222.55413  | 6855.459491 | 6976.714884 |
| <a href="#">HSDL2</a>       | -0.853323579     | 0.103637911      | -8.233701054   | 1.82E-16 | 1.03E-14  | Yes          | OK     | 1586.137682 | 1118.410925 | 2053.864439 | 1133.681551 | 1093.116677 | 1128.434549 | 2272.065516 | 2013.688546 | 1875.839253 |
| <a href="#">MAPK8</a>       | 0.872148445      | 0.106082264      | 8.221435085    | 2.01E-16 | 1.14E-14  | Yes          | OK     | 2031.476248 | 2644.30271  | 1418.649785 | 2568.340504 | 2959.060644 | 2405.506982 | 1468.193863 | 1455.112936 | 1332.642558 |
| <a href="#">COL6A2</a>      | -1.120588242     | 0.136383566      | -8.216446272   | 2.10E-16 | 1.18E-14  | Yes          | OK     | 792.3413855 | 485.4597196 | 1099.223051 | 442.3455769 | 514.5293998 | 499.5041821 | 963.476109  | 1311.948598 | 1022.244447 |
| <a href="#">YRDC</a>        | 1.129807636      | 0.137512405      | 8.216041566    | 2.10E-16 | 1.18E-14  | Yes          | OK     | 1070.243682 | 1488.328376 | 652.1589883 | 1721.955565 | 1317.319246 | 1425.710317 | 710.2816068 | 537.4530036 | 708.7423544 |
| <a href="#">YME1L1</a>      | -0.71694057      | 0.087288264      | -8.213481842   | 2.15E-16 | 1.20E-14  | Yes          | OK     | 4439.19308  | 3338.302762 | 5540.083399 | 3380.979492 | 3355.806206 | 3278.122588 | 5978.064253 | 5271.263957 | 5370.921988 |
| <a href="#">TSG1NALC4</a>   | 0.960429203      | 0.117095378      | 8.202110301    | 2.36E-16 | 1.32E-14  | Yes          | OK     | 754.4048527 | 1004.95247  | 503.8572359 | 1037.003961 | 935.0094285 | 1074.844019 | 503.0465027 | 478.7790949 | 529.7461101 |
| <a href="#">RASA2</a>       | 0.860463747      | 0.104965073      | 8.197619655    | 2.45E-16 | 1.36E-14  | Yes          | OK     | 1257.44002  | 1632.18357  | 882.6964694 | 1701.890405 | 1679.969486 | 1514.690819 | 954.2842294 | 840.2103724 | 853.5948064 |
| <a href="#">EFCAB14</a>     | 0.794294161      | 0.096964982      | 8.191556821    | 2.58E-16 | 1.43E-14  | Yes          | OK     | 2309.063411 | 2943.762822 | 1674.364    | 3118.308304 | 2749.322757 | 2963.657404 | 1676.264592 | 1563.072928 | 1783.754448 |

## KO\_vs\_Control\_Differential\_Exp

| Gene Symbol | Log2 Fold Change | LFC Standard Err | Wald Statistic | p Value    | FDR Adj p | Va Significa | Status | Base Mean   | KD          | Control     | siICAM1_1   | siICAM1_2   | siICAM1_3   | siCon_1     | siCon_2     | siCon_3     |
|-------------|------------------|------------------|----------------|------------|-----------|--------------|--------|-------------|-------------|-------------|-------------|-------------|-------------|-------------|-------------|-------------|
| ARHGEF40    | -1.196227081     | 0.146759722      | -8.150922245   | 3.61E-16   | 1.97E-14  | Yes          | OK     | 597.8672608 | 350.5283596 | 845.2061621 | 312.8340884 | 360.5838565 | 378.1671338 | 717.8022356 | 1013.885142 | 803.9311085 |
| MICB        | -0.785660906     | 0.096402168      | -8.14982608    | 3.64E-16   | 1.98E-14  | Yes          | OK     | 1435.245833 | 1045.156602 | 1825.335064 | 1047.036541 | 1109.647742 | 978.7855228 | 1870.129689 | 1802.462475 | 1803.413027 |
| IFT172      | -1.070173611     | 0.131412978      | -8.143591522   | 3.84E-16   | 2.08E-14  | Yes          | OK     | 424.0532538 | 267.2195974 | 580.8869103 | 263.5832407 | 243.8332095 | 294.2423421 | 593.294048  | 558.5756107 | 590.791072  |
| FAM91A1     | -0.692046429     | 0.085100461      | -8.132111383   | 4.22E-16   | 2.27E-14  | Yes          | OK     | 2752.71923  | 2093.427996 | 3412.010464 | 2115.050294 | 2148.005265 | 2017.228428 | 3536.366776 | 3325.637145 | 3374.027471 |
| WDR66       | 1.182197313      | 0.145557416      | 8.121862454    | 4.59E-16   | 2.46E-14  | Yes          | OK     | 605.2204152 | 853.058761  | 357.3820694 | 912.9647886 | 761.462184  | 884.7493104 | 382.7164422 | 282.8082399 | 406.6215259 |
| KLHL5       | -0.878713553     | 0.108474518      | -8.10064491    | 5.47E-16   | 2.92E-14  | Yes          | OK     | 1513.623033 | 1053.720692 | 1973.525373 | 1022.411117 | 1145.809446 | 992.9415118 | 2167.612339 | 1935.065509 | 1817.898272 |
| B4GAT1      | -1.252433338     | 0.154859443      | -8.087549041   | 6.09E-16   | 3.24E-14  | Yes          | OK     | 382.5216872 | 216.7957024 | 548.247672  | 217.9806039 | 172.5429915 | 259.8635117 | 540.6496466 | 525.7182219 | 578.3751476 |
| BCL2L1      | -0.729158213     | 0.090450751      | -8.061383694   | 7.54E-16   | 4.00E-14  | Yes          | OK     | 4924.966159 | 3681.109056 | 6168.823263 | 3546.97309  | 3825.908368 | 3670.445711 | 5898.679838 | 6712.295154 | 5895.494796 |
| PSIP1       | -0.955202794     | 0.118603535      | -8.053746388   | 8.03E-16   | 4.25E-14  | Yes          | OK     | 747.5997869 | 500.3349761 | 994.8645976 | 496.1566883 | 557.9234455 | 446.9247945 | 964.3117344 | 1037.354706 | 982.9273528 |
| DRAM2       | -1.17130981      | 0.145588407      | -8.045350815   | 8.60E-16   | 4.53E-14  | Yes          | OK     | 451.2218698 | 268.4086094 | 634.0351302 | 282.7363481 | 224.2025698 | 298.2869104 | 698.5828509 | 570.3103925 | 633.2121473 |
| METTL7A     | -1.419987353     | 0.17661406       | -8.040058378   | 8.98E-16   | 4.71E-14  | Yes          | OK     | 200.9134728 | 102.2616834 | 299.5652622 | 82.08474623 | 105.3855397 | 119.3147641 | 288.2907698 | 314.4921506 | 295.9128662 |
| ZFP90       | -1.141865388     | 0.142114961      | -8.034800712   | 9.37E-16   | 4.90E-14  | Yes          | OK     | 325.0688619 | 196.7662687 | 453.3714552 | 179.674389  | 194.2400144 | 216.3844028 | 464.6077334 | 433.0134461 | 462.493186  |
| COL1A1      | 1.512260125      | 0.188755869      | 8.011725053    | 1.13E-15   | 5.89E-14  | Yes          | OK     | 144.9085745 | 720.6260073 | 69.19114168 | 206.1239183 | 224.2025698 | 231.5515338 | 61.83628106 | 77.44955947 | 68.28758451 |
| FBP1        | -0.885471525     | 0.110572683      | -8.008049527   | 1.17E-15   | 6.05E-14  | Yes          | OK     | 741.3098389 | 513.7827357 | 968.8369422 | 549.055747  | 490.7659937 | 501.5264663 | 981.8598682 | 998.6299259 | 926.0210324 |
| MED7        | -1.248236291     | 0.155955721      | -8.003786493   | 1.21E-15   | 6.24E-14  | Yes          | OK     | 252.1957568 | 143.2131551 | 361.1783586 | 150.4887014 | 145.6800108 | 133.4707531 | 391.9083219 | 362.6047557 | 329.0219981 |
| VAPB        | 0.851129239      | 0.106371926      | 8.001446149    | 1.23E-15   | 6.32E-14  | Yes          | OK     | 1356.335741 | 1756.108886 | 956.5625956 | 1586.059708 | 1927.935462 | 1754.33149  | 932.5579685 | 990.4155787 | 946.7142398 |
| ANLN        | -0.834636931     | 0.10431403       | -8.001195353   | 1.23E-15   | 6.32E-14  | Yes          | OK     | 12599.57911 | 8957.48889  | 16241.66933 | 9364.957492 | 9693.40327  | 7814.10591  | 17641.72386 | 15122.61323 | 15960.67089 |
| ECE2        | 1.150578926      | 0.144303864      | 7.973306437    | 1.54E-15   | 7.90E-14  | Yes          | OK     | 383.2839647 | 536.55399   | 230.0139394 | 487.0361609 | 580.65366   | 541.972149  | 246.5094988 | 198.3178114 | 245.214508  |
| EHHADH      | -1.696085009     | 0.213332695      | -7.950422253   | 1.86E-15   | 9.47E-14  | Yes          | OK     | 112.4269745 | 46.12580204 | 178.728147  | 46.51468953 | 40.29447107 | 51.56824552 | 199.7144753 | 185.4095515 | 151.0604142 |
| HADH        | -0.90187592      | 0.113456399      | -7.949097022   | 1.88E-15   | 9.54E-14  | Yes          | OK     | 660.899564  | 454.6919063 | 867.1072217 | 444.1696824 | 462.8698215 | 457.0362152 | 926.7085950 | 817.9142871 | 856.6987875 |
| CDK5R1      | 1.320611704      | 0.16650964       | 7.931142628    | 2.17E-15   | 1.10E-13  | Yes          | OK     | 316.2168933 | 606.6897513 | 171.7440354 | 407.6875729 | 551.7242961 | 422.6573849 | 149.5769501 | 195.970855  | 169.6843009 |
| PRR14L      | 0.704859327      | 0.088892437      | 7.929350889    | 2.20E-15   | 1.11E-13  | Yes          | OK     | 1983.156297 | 2467.254565 | 1499.058029 | 2447.949543 | 2474.4938   | 2479.320353 | 1481.563869 | 1579.501622 | 1436.108595 |
| LRRC61      | -1.066098764     | 0.134560287      | -7.928853187   | 2.21E-15   | 1.11E-13  | Yes          | OK     | 776.0004846 | 489.0178206 | 1062.983149 | 456.9384207 | 425.6749251 | 584.4401159 | 1062.915534 | 1144.141219 | 981.8926924 |
| FNBP1       | -0.714038522     | 0.090138274      | -7.921590844   | 2.34E-15   | 1.17E-13  | Yes          | OK     | 2598.0879   | 1955.080776 | 3241.095025 | 1842.346526 | 2016.789936 | 2006.105865 | 3096.827806 | 3389.004966 | 3237.452302 |
| FN3KRP      | -0.955051179     | 0.120654736      | -7.915571391   | 2.46E-15   | 1.23E-13  | Yes          | OK     | 535.4818549 | 358.0552407 | 712.908469  | 387.6224127 | 330.621301  | 355.9220083 | 719.4734864 | 714.6482078 | 704.6037129 |
| ST14        | 1.778148683      | 0.224732942      | 7.91227432     | 2.53E-15   | 1.26E-13  | Yes          | OK     | 91.99203622 | 149.2146371 | 34.7694353  | 145.016385  | 156.0119264 | 146.6156    | 35.93189305 | 26.989998   | 41.38641485 |
| IL6R        | 2.257192049      | 0.285515729      | 7.9056662      | 2.67E-15   | 1.32E-13  | Yes          | OK     | 58.06751959 | 105.4048457 | 10.73019344 | 93.02937906 | 129.1489457 | 94.03621242 | 19.21938465 | 4.693912695 | 8.277282971 |
| CGN         | 1.589520927      | 0.201562964      | 7.885977142    | 3.12E-15   | 1.54E-13  | Yes          | OK     | 278.1535331 | 431.8250554 | 124.4820109 | 356.6126197 | 593.0519588 | 345.8105876 | 120.3300604 | 145.5112936 | 107.6046786 |
| TMEM19      | -1.038461238     | 0.131765897      | -7.881107766   | 3.24E-15   | 1.60E-13  | Yes          | OK     | 1015.198074 | 649.8727391 | 1380.523409 | 635.7007569 | 731.4996286 | 582.4178318 | 1557.605782 | 1411.694243 | 1172.270201 |
| PKD1        | -1.086695919     | 0.137941907      | -7.877924406   | 3.33E-15   | 1.63E-13  | Yes          | OK     | 919.1695931 | 572.3848323 | 1265.954354 | 591.0101728 | 603.3838744 | 522.7604497 | 1169.039962 | 1537.256408 | 1091.566692 |
| SLC4A7      | 0.761972476      | 0.096731673      | 7.87717663     | 3.35E-15   | 1.63E-13  | Yes          | OK     | 2338.386557 | 2956.069192 | 1720.703921 | 2979.676288 | 3204.960237 | 2683.571051 | 1718.881488 | 1713.278134 | 1729.952141 |
| ENO2        | -0.834342969     | 0.105945453      | -7.875212623   | 3.40E-15   | 1.66E-13  | Yes          | OK     | 1250.766316 | 889.1571919 | 1612.375439 | 939.4143179 | 900.9430454 | 827.1142125 | 1748.964004 | 1563.072928 | 1525.089387 |
| DDAH1       | 0.775879463      | 0.098527903      | 7.874718125    | 3.42E-15   | 1.66E-13  | Yes          | OK     | 4687.135992 | 5948.415743 | 3425.856242 | 6408.082522 | 5739.379148 | 5697.785559 | 3637.477452 | 3075.686294 | 3564.404979 |
| WBSCR22     | -0.830215481     | 0.10546747       | -7.871768212   | 3.50E-15   | 1.69E-13  | Yes          | OK     | 812.142805  | 578.4559154 | 1045.829695 | 580.9775927 | 600.2842997 | 554.1058538 | 1043.696149 | 1011.538186 | 1082.254748 |
| PEA15       | 0.768472932      | 0.097651736      | 7.869526564    | 3.56E-15   | 1.71E-13  | Yes          | OK     | 4863.789813 | 6159.971689 | 3567.607938 | 6460.981581 | 6230.145142 | 5788.788345 | 3643.32683  | 3201.248458 | 3858.248525 |
| KLHL8       | -0.954127273     | 0.121319203      | -7.864602234   | 3.70E-15   | 1.78E-13  | Yes          | OK     | 521.9235917 | 349.5307166 | 694.3164668 | 331.0751431 | 360.5838565 | 356.9331504 | 740.3641219 | 670.0560372 | 672.5292414 |
| PPP2CB      | 0.948519226      | 0.12064969       | 7.861762631    | 3.79E-15   | 1.81E-13  | Yes          | OK     | 1474.941245 | 1959.483645 | 990.3988453 | 2103.193609 | 2068.449515 | 1706.807813 | 869.0504365 | 1020.926011 | 1081.220088 |
| BRWD3       | 0.746684094      | 0.095092004      | 7.852227979    | 4.09E-15   | 1.95E-13  | Yes          | OK     | 1207.476805 | 1519.866272 | 895.0873379 | 1537.720913 | 1543.588199 | 1478.289705 | 869.0504365 | 895.3638466 | 920.8477305 |
| CASP7       | 0.911191912      | 0.116151361      | 7.844866398    | 4.33E-15   | 2.06E-13  | Yes          | OK     | 1219.246493 | 1605.200747 | 833.2922392 | 1720.13146  | 1533.256284 | 1562.214497 | 953.4486039 | 783.8834201 | 762.5446937 |
| MAK16       | 0.835494688      | 0.106525158      | 7.843167768    | 4.39E-15   | 2.08E-13  | Yes          | OK     | 1260.904057 | 1626.471762 | 895.3363522 | 1715.571196 | 1704.766084 | 1459.078006 | 929.2154668 | 856.6390669 | 900.1545231 |
| CHIC2       | 0.915821116      | 0.116777076      | 7.842473432    | 4.42E-15   | 2.08E-13  | Yes          | OK     | 729.8068781 | 961.8849756 | 497.7287805 | 899.2839975 | 1065.220504 | 921.1504249 | 506.3890044 | 478.7790949 | 508.0182423 |
| GNPDA1      | 0.741317365      | 0.09523776       | 7.783859699    | 7.03E-15   | 3.31E-13  | Yes          | OK     | 2418.041416 | 3040.02128  | 1796.061552 | 2915.832596 | 3262.818965 | 2941.412279 | 1873.472191 | 1836.493342 | 1678.219122 |
| IGF2BP2     | 0.994581225      | 0.127807811      | 7.781850058    | 7.15E-15   | 3.35E-13  | Yes          | OK     | 1337.173717 | 1798.045694 | 876.3017414 | 1727.427882 | 2004.391638 | 1662.317562 | 770.446637  | 1033.834271 | 824.624316  |
| ANKRD13C    | 0.692677038      | 0.089019013      | 7.781225812    | 7.18E-15   | 3.35E-13  | Yes          | OK     | 2416.160972 | 2996.713778 | 1835.608165 | 3052.640507 | 3130.570444 | 2806.930384 | 1860.93781  | 1808.329866 | 1837.55682  |
| DUSP2       | 2.08639806       | 0.268262958      | 7.777436265    | 7.40E-15   | 3.45E-13  | Yes          | OK     | 53.75429134 | 93.72171045 | 13.78687223 | 84.82090443 | 103.3191566 | 93.02507035 | 10.86313046 | 12.90825991 | 17.58922631 |
| CORO1C      | -0.7912786       | 0.101875991      | -7.767076338   | 8.03E-15   | 3.73E-13  | Yes          | OK     | 5007.794344 | 3633.191474 | 6382.397214 | 4022.152565 | 3441.561106 | 3435.860751 | 6736.812134 | 5778.206528 | 6632.17298  |
| NEURL1B     | -1.529075477     | 0.197027019      | -7.760740052   | 8.44E-15   | 3.90E-13  | Yes          | OK     | 183.5688709 | 85.65894304 | 281.4787989 | 76.61242981 | 112.6178807 | 67.74651863 | 261.5507564 | 318.0125351 | 264.8730551 |
| F11R        | 0.987813558      | 0.127380854      | 7.75480401     | 8.85E-15   | 4.08E-13  | Yes          | OK     | 1102.845418 | 1481.838155 | 723.8526807 | 1632.574397 | 1466.098832 | 1346.841236 | 842.3104231 | 636.0251702 | 693.2224488 |
| ABL1        | 0.659408011      | 0.085109385      | 7.747770791    | 9.35E-15   | 4.30E-13  | Yes          | OK     | 8614.498971 | 10584.83917 | 6644.158768 | 10722.09196 | 11165.70125 | 9866.72431  | 6649.071465 | 6406.017351 | 6877.387488 |
| FBXO45      | 0.881368743      | 0.113906458      | 7.737653842    | 1.01E-14   | 4.64E-13  | Yes          | OK     | 1939.940617 | 2533.899483 | 1345.981751 | 2647.689092 | 2767.920205 | 2186.089153 | 1430.590719 | 1233.325661 | 1374.028973 |
| KCNN4       | -1.132824806     | 0.146511646      | -7.731977858   | 1.06E-14</ |           |              |        |             |             |             |             |             |             |             |             |             |

## KO\_vs\_Control\_Differential\_Expr

| Gene Symbol | Log2 Fold Change | LFC Standard Err | Wald Statistic | p Value  | FDR Adj p | Significance | Status | Base Mean   | KD          | Control     | siCAM1_1    | siCAM1_2    | siCAM1_3    | siCon_1     | siCon_2     | siCon_3     |
|-------------|------------------|------------------|----------------|----------|-----------|--------------|--------|-------------|-------------|-------------|-------------|-------------|-------------|-------------|-------------|-------------|
| ARN2        | -0.926694937     | 0.119877407      | -7.73035518    | 1.07E-14 | 4.87E-13  | Yes          | OK     | 741.9849766 | 503.0706963 | 980.8992569 | 527.1664813 | 437.0400323 | 545.0055752 | 985.2023699 | 1013.885142 | 943.6102587 |
| VPS33A      | 0.820407676      | 0.1061319        | 7.730076189    | 1.07E-14 | 4.87E-13  | Yes          | OK     | 1569.84819  | 2017.128129 | 1122.568251 | 2101.369503 | 1833.583114 | 2126.431771 | 1155.669596 | 1031.847315 | 1180.547484 |
| GJB3        | 1.600765439      | 0.20713677       | 7.728060244    | 1.09E-14 | 4.94E-13  | Yes          | OK     | 156.7781303 | 244.9646032 | 68.59165732 | 244.4301332 | 239.7004433 | 250.7632331 | 78.54878946 | 43.41869243 | 83.80749008 |
| DDX21       | 0.805476947      | 0.104251113      | 7.72631507     | 1.11E-14 | 4.99E-13  | Yes          | OK     | 13098.95661 | 16760.94186 | 9436.971363 | 17833.36714 | 17951.70346 | 14497.75499 | 10039.20379 | 8751.80022  | 9519.910077 |
| REPIN1      | -0.794669124     | 0.103106164      | -7.70729015    | 1.29E-14 | 5.77E-13  | Yes          | OK     | 2885.58206  | 2089.52592  | 3681.6382   | 2001.955755 | 1971.329507 | 2295.292497 | 3358.378562 | 3717.578855 | 3968.957184 |
| ELL2        | 0.79467265       | 0.103386987      | 7.686389519    | 1.51E-14 | 6.78E-13  | Yes          | OK     | 2259.961846 | 2883.661195 | 1636.262496 | 2882.998698 | 3194.628321 | 2573.356566 | 1694.648351 | 1595.930316 | 1618.208821 |
| PPM1E       | 1.950781601      | 0.254107285      | 7.676999894    | 1.63E-14 | 7.27E-13  | Yes          | OK     | 82.03239512 | 138.6145794 | 25.45021087 | 115.8306975 | 175.6425662 | 124.3704745 | 18.38375923 | 35.20434521 | 22.76252817 |
| LIMA1       | 0.811346255      | 0.105827796      | 7.666664954    | 1.77E-14 | 7.85E-13  | Yes          | OK     | 5337.83656  | 6841.467913 | 3834.205208 | 6711.796083 | 7836.758026 | 5975.849628 | 3809.616289 | 3877.171886 | 3815.82745  |
| MTMR2       | 0.688427351      | 0.089927571      | 7.655353581    | 1.93E-14 | 8.55E-13  | Yes          | OK     | 2322.822582 | 4005.414008 | 2460.231155 | 4096.940889 | 4218.521163 | 3700.779973 | 2519.410641 | 2391.548518 | 2469.734306 |
| FGD5-AS1    | -1.087448257     | 0.142118745      | -7.651687712   | 1.98E-14 | 8.77E-13  | Yes          | OK     | 3043.537452 | 1892.114278 | 4194.960626 | 1713.747091 | 2270.955062 | 1691.640682 | 3995.125132 | 5072.946145 | 3516.810602 |
| FAM196B     | 1.230398987      | 0.160883367      | 7.647769989    | 2.04E-14 | 9.01E-13  | Yes          | OK     | 330.1403803 | 471.4755402 | 188.8052204 | 445.0817351 | 505.2306757 | 464.1142097 | 158.7688298 | 174.8482479 | 232.7985836 |
| COL6A1      | -0.771918633     | 0.100989774      | -7.643532613   | 2.11E-14 | 9.28E-13  | Yes          | OK     | 1867.337774 | 1367.073828 | 2367.60172  | 1234.007352 | 1498.12777  | 1369.086362 | 2313.846787 | 2436.140689 | 2352.817684 |
| ZNF367      | 0.731175441      | 0.096069375      | 7.610910775    | 2.72E-14 | 1.19E-12  | Yes          | OK     | 1625.28563  | 2038.08014  | 1212.491119 | 1994.659333 | 2188.299736 | 1931.281352 | 1243.410625 | 1214.54991  | 1179.512853 |
| RFTN1       | 0.943256026      | 0.124004178      | 7.606647111    | 2.81E-14 | 1.23E-12  | Yes          | OK     | 1865.177399 | 2476.676698 | 1253.678099 | 2374.985324 | 2906.367875 | 2148.676897 | 1248.424377 | 1368.275551 | 1144.334371 |
| TADA2B      | 0.800624838      | 0.105475538      | 7.590621052    | 3.18E-14 | 1.39E-12  | Yes          | OK     | 816.557232  | 1043.701677 | 589.4127865 | 990.4892711 | 1091.050293 | 1049.565468 | 582.4309176 | 586.7390869 | 599.068355  |
| DAGLB       | 0.889021658      | 0.117260995      | 7.581563309    | 3.41E-14 | 1.48E-12  | Yes          | OK     | 1076.226127 | 1409.147919 | 743.3043356 | 1337.981363 | 1545.654582 | 1343.80781  | 737.8572456 | 665.3621245 | 826.6936367 |
| PRKCE       | 1.028989948      | 0.135778797      | 7.578428802    | 3.50E-14 | 1.51E-12  | Yes          | OK     | 921.0328574 | 1250.686215 | 591.3805    | 1134.593603 | 1498.12777  | 1119.33427  | 574.0746634 | 654.800821  | 545.2660157 |
| F3          | 0.889264128      | 0.117459727      | 7.570800249    | 3.71E-14 | 1.60E-12  | Yes          | OK     | 13018.64542 | 17044.25456 | 8993.036278 | 17975.64737 | 17471.26938 | 15685.84692 | 10040.87504 | 7336.585543 | 9601.648246 |
| MARCKSL1    | -1.112030113     | 0.146951804      | -7.567311746   | 3.81E-14 | 1.64E-12  | Yes          | OK     | 370.6637943 | 227.0822229 | 514.2453656 | 202.4757074 | 260.3642746 | 218.4066869 | 494.6902485 | 567.9634361 | 480.0824123 |
| HIST1H4H    | -0.662171631     | 0.087574566      | -7.561232217   | 3.99E-14 | 1.71E-12  | Yes          | OK     | 3573.063218 | 2751.995892 | 4394.130543 | 2604.822614 | 2695.596795 | 2955.568268 | 4478.116624 | 4344.216199 | 4360.058805 |
| SLC8B1      | 0.683547572      | 0.090476538      | 7.554970468    | 4.19E-14 | 1.79E-12  | Yes          | OK     | 2054.262015 | 2541.290097 | 1567.233933 | 2620.32751  | 2577.812957 | 2425.729824 | 1494.098251 | 1619.39988  | 1588.20367  |
| HSPB8       | 1.129581299      | 0.150154701      | 7.522783459    | 5.36E-14 | 2.28E-12  | Yes          | OK     | 387.3350149 | 540.4430402 | 234.2269896 | 559.0883271 | 546.5583383 | 515.6824552 | 256.5370039 | 185.4095515 | 260.7344136 |
| MAPK9       | -0.792472253     | 0.1054129        | -7.517792      | 5.57E-14 | 2.37E-12  | Yes          | OK     | 1086.66058  | 787.5329741 | 1385.788186 | 753.3555598 | 829.6528273 | 779.5905352 | 1438.111347 | 1444.551632 | 1274.701577 |
| COX7A2L     | -0.883904743     | 0.117602552      | -7.51603369    | 5.65E-14 | 2.39E-12  | Yes          | OK     | 1478.069503 | 1023.723181 | 1932.415825 | 963.127689  | 1128.24519  | 979.7966649 | 1984.610372 | 2133.38332  | 1679.253783 |
| SH3D21      | -1.350980102     | 0.179966981      | -7.506822058   | 6.06E-14 | 2.56E-12  | Yes          | OK     | 165.4203041 | 87.27059256 | 243.5700157 | 74.78832434 | 92.98724092 | 94.03621242 | 246.5094988 | 253.4712855 | 230.7292628 |
| CEP57       | -0.75070746      | 0.100120283      | -7.498055727   | 6.48E-14 | 2.73E-12  | Yes          | OK     | 1803.883575 | 1333.603306 | 2274.163844 | 1373.55142  | 1388.609464 | 1238.649035 | 2456.738734 | 2208.485923 | 2157.266874 |
| WNT9A       | -1.764342699     | 0.235324613      | -7.497484769   | 6.51E-14 | 2.73E-12  | Yes          | OK     | 184.5952537 | 69.09155121 | 300.0989563 | 63.84369151 | 40.29447107 | 103.136491  | 288.2907698 | 240.5630256 | 371.4430733 |
| PDE4DIP     | -0.715553521     | 0.095701153      | -7.476958172   | 7.61E-14 | 3.18E-12  | Yes          | OK     | 2969.321829 | 2230.975455 | 3707.668202 | 2255.506416 | 2014.723553 | 2422.696397 | 3646.669332 | 3681.210131 | 3795.134242 |
| FPR1        | -1.638284842     | 0.219179431      | -7.474628586   | 7.74E-14 | 3.23E-12  | Yes          | OK     | 134.6885559 | 56.60324703 | 212.7738648 | 59.28342783 | 61.99149395 | 48.53481931 | 198.0432245 | 275.7673708 | 164.510999  |
| LRPAP1      | -0.789278262     | 0.105670524      | -7.4692377     | 8.07E-14 | 3.35E-12  | Yes          | OK     | 2492.243755 | 1808.85539  | 3175.63212  | 1759.349727 | 1696.500551 | 1970.715893 | 3530.517398 | 2960.685433 | 3035.69353  |
| BTN3A1      | -1.032591285     | 0.138250351      | -7.468995755   | 8.08E-14 | 3.35E-12  | Yes          | OK     | 547.7884241 | 350.5511049 | 745.0257434 | 337.4595123 | 299.6255541 | 414.5682483 | 734.514744  | 789.750811  | 710.8116751 |
| FLVCR2      | 1.430185632      | 0.191587805      | 7.464909517    | 8.34E-14 | 3.44E-12  | Yes          | OK     | 160.1375634 | 240.2352934 | 80.03983349 | 230.7493422 | 215.9370372 | 274.0195007 | 66.85003358 | 91.53129756 | 81.73816934 |
| F2RL3       | -1.866082877     | 0.25020608       | -7.458183585   | 8.77E-14 | 3.60E-12  | Yes          | OK     | 65.62097447 | 21.77190622 | 109.4700427 | 17.32900198 | 21.69702288 | 26.2896938  | 101.1106758 | 119.6947737 | 107.6046786 |
| C2orf69     | 1.0260262        | 0.137614805      | 7.455783572    | 8.93E-14 | 3.66E-12  | Yes          | OK     | 1182.767775 | 1605.736896 | 759.7986553 | 1553.225809 | 1943.433335 | 1320.551542 | 765.4328845 | 815.5673308 | 698.3957507 |
| ATP6V1G1    | 0.812798606      | 0.109177687      | 7.444731852    | 9.71E-14 | 3.97E-12  | Yes          | OK     | 2411.514224 | 3094.036041 | 1728.992406 | 3320.784011 | 3062.379801 | 2898.944312 | 1966.226613 | 1581.848578 | 1638.902028 |
| ZNF107      | 0.957508212      | 0.128661491      | 7.442073033    | 9.91E-14 | 4.04E-12  | Yes          | OK     | 466.6675367 | 622.0315282 | 311.3035452 | 579.1534873 | 651.943878  | 634.9972194 | 284.1126427 | 323.879976  | 325.918017  |
| EIF5A2      | 0.889386774      | 0.119710122      | 7.429503508    | 1.09E-13 | 4.43E-12  | Yes          | OK     | 974.291842  | 1276.400499 | 672.1831851 | 1356.222418 | 1171.639236 | 1301.339843 | 706.1034797 | 582.0451742 | 728.4009014 |
| SGK1        | 0.913989631      | 0.123162304      | 7.421017668    | 1.16E-13 | 4.71E-12  | Yes          | OK     | 1216.475436 | 1603.794688 | 829.1561838 | 1590.619971 | 1860.77801  | 1359.980683 | 848.1598011 | 834.3429816 | 804.9657689 |
| UGP2        | -0.880308018     | 0.118757939      | -7.412624568   | 1.24E-13 | 5.00E-12  | Yes          | OK     | 2086.954576 | 1447.420497 | 2726.488655 | 1431.010743 | 1619.011184 | 1292.239564 | 2879.565196 | 2941.909782 | 2357.990986 |
| BSN         | 2.020958454      | 0.272893482      | 7.405667744    | 1.30E-13 | 5.25E-12  | Yes          | OK     | 69.33206869 | 120.4346643 | 18.22947306 | 76.61242981 | 168.4102252 | 116.2813379 | 19.21938465 | 19.94912895 | 15.51990557 |
| DNMT3B      | 0.976538024      | 0.132042105      | 7.395656312    | 1.41E-13 | 5.65E-12  | Yes          | OK     | 409.584232  | 548.9013802 | 270.2670838 | 529.9026395 | 592.0187672 | 524.7827338 | 266.5645089 | 288.6756308 | 255.5611117 |
| ARID3A      | 1.490654896      | 0.201619027      | 7.39342372     | 1.43E-13 | 5.73E-12  | Yes          | OK     | 125.2627084 | 191.1474003 | 59.37801644 | 172.3779671 | 220.0698035 | 180.9944304 | 57.65815396 | 56.32695234 | 64.14894302 |
| RASAL2      | 0.798754251      | 0.108081329      | 7.390307445    | 1.46E-13 | 5.85E-12  | Yes          | OK     | 2899.294956 | 3705.283919 | 2093.305993 | 3926.387028 | 3375.436845 | 3814.027884 | 2104.940432 | 1855.268993 | 2319.708553 |
| LAMA1       | 1.659608082      | 0.224664547      | 7.387049298    | 1.50E-13 | 5.98E-12  | Yes          | OK     | 116.2482365 | 184.735646  | 47.76082687 | 215.2444457 | 152.9123517 | 186.0501407 | 42.61689641 | 37.55130156 | 63.11428265 |
| GPCPD1      | 1.099880829      | 0.149115943      | 7.376010938    | 1.63E-13 | 6.47E-12  | Yes          | OK     | 752.5336897 | 1041.415438 | 463.6519419 | 993.2254293 | 1257.394136 | 873.6267477 | 442.8814725 | 536.2795254 | 411.7948278 |
| POLR3G      | 1.049121027      | 0.142240187      | 7.375700584    | 1.63E-13 | 6.47E-12  | Yes          | OK     | 439.9299816 | 601.3141962 | 728.5457671 | 591.0101728 | 690.1719659 | 522.7604497 | 297.4826494 | 272.2469363 | 265.9077154 |
| RARRF3      | -1.427569877     | 0.193945079      | -7.360691403   | 1.83E-13 | 7.22E-12  | Yes          | OK     | 413.7666838 | 205.5725763 | 621.9607912 | 201.5636546 | 126.9702288 | 198.1838455 | 542.3208974 | 476.5881958 | 446.9732804 |
| ZCCHC2      | 1.030908247      | 0.140091396      | 7.358826264    | 1.86E-13 | 7.30E-12  | Yes          | OK     | 374.153444  | 509.0684523 | 239.2384357 | 488.8602664 | 516.5957829 | 521.7493076 | 239.8244955 | 208.8791149 | 269.0116965 |
| ZDHHC20     | -0.807704946     | 0.109888811      | -7.350201925   | 1.98E-13 | 7.75E-12  | Yes          | OK     | 761.4333512 | 547.7395221 | 975.1271804 | 528.9905868 | 566.188978  | 548.0390014 | 1036.175521 | 917.6599319 | 971.5460887 |
| CST1        | 1.426072852      | 0.194053112      | 7.348879066    | 2.00E-13 | 7.80E-12  | Yes          | OK     | 398.8537313 | 599.7239781 | 979.9834845 | 771.5966145 | 533.1268479 | 494.4484718 | 263.2220072 | 163.1134662 | 167.6149802 |
| KRCCL1      | -1.656196081     | 0.225557743      | -7.342670037   | 2.09E-1  |           |              |        |             |             |             |             |             |             |             |             |             |

## KO\_vs\_Control\_Differential\_Expr

| Gene Symbol               | Log2 Fold Change | LFC Standard Err | Wald Statistic | p Value  | FDR Adj p | Va Significa | Status | Base Mean   | KD          | Control     | siCAM1_1    | siCAM1_2    | siCAM1_3    | siCon_1     | siCon_2     | siCon_3      |
|---------------------------|------------------|------------------|----------------|----------|-----------|--------------|--------|-------------|-------------|-------------|-------------|-------------|-------------|-------------|-------------|--------------|
| <a href="#">BDNF</a>      | 0.762009622      | 0.1038308        | 7.338955518    | 2.15E-13 | 8.33E-12  | Yes          | OK     | 1076.971332 | 1362.803184 | 791.1394792 | 1312.443887 | 1439.235851 | 1336.729815 | 793.8441488 | 740.4647277 | 839.1095612  |
| <a href="#">POFUT1</a>    | -0.615636592     | 0.084045429      | -7.325045498   | 2.39E-13 | 9.22E-12  | Yes          | OK     | 3496.146875 | 2748.45145  | 4243.8423   | 2781.760844 | 2624.306577 | 2839.28693  | 4341.074056 | 4096.612305 | 4293.840541  |
| <a href="#">MIR1825</a>   | -0.615636592     | 0.084045429      | -7.325045498   | 2.39E-13 | 9.22E-12  | Yes          | OK     | 3496.146875 | 2748.45145  | 4243.8423   | 2781.760844 | 2624.306577 | 2839.28693  | 4341.074056 | 4096.612305 | 4293.840541  |
| <a href="#">RNF213</a>    | -0.777145562     | 0.106154192      | -7.320912575   | 2.46E-13 | 9.48E-12  | Yes          | OK     | 5400.249722 | 3939.35235  | 6861.147093 | 3736.680059 | 3663.697292 | 4417.6797   | 6145.189337 | 7194.594684 | 7243.657226  |
| <a href="#">PNP</a>       | 0.942920867      | 0.128835622      | 7.318790054    | 2.50E-13 | 9.61E-12  | Yes          | OK     | 3050.673898 | 4053.864234 | 2047.483563 | 4054.074411 | 4746.482053 | 3361.036238 | 2089.063549 | 2253.078094 | 1800.309046  |
| <a href="#">CTNNB1</a>    | -0.63990577      | 0.087462937      | -7.316307854   | 2.55E-13 | 9.76E-12  | Yes          | OK     | 14455.38774 | 11240.59558 | 17670.17991 | 11644.17728 | 11055.14975 | 11022.45969 | 18707.17691 | 16126.21655 |              |
| <a href="#">SNRNP27</a>   | -1.230729047     | 0.168271687      | -7.31394015    | 2.59E-13 | 9.91E-12  | Yes          | OK     | 222.4711254 | 126.3215192 | 318.6207316 | 131.335594  | 137.4144782 | 110.2144855 | 312.523907  | 356.7373648 | 286.6009229  |
| <a href="#">LMBR1L</a>    | 1.036709065      | 0.141767877      | 7.312721923    | 2.62E-13 | 9.97E-12  | Yes          | OK     | 324.0115011 | 441.5613144 | 206.4616878 | 435.049155  | 418.4425841 | 471.1922042 | 221.4407362 | 206.5321586 | 191.4121687  |
| <a href="#">CRY2</a>      | 0.897824886      | 0.12278424       | 7.312216032    | 2.63E-13 | 9.98E-12  | Yes          | OK     | 503.2636211 | 660.7699826 | 345.7572596 | 686.7757101 | 628.180472  | 667.3537656 | 338.428295  | 327.4004105 | 371.4430733  |
| <a href="#">UBAC2</a>     | -0.858681037     | 0.117536483      | -7.305655375   | 2.76E-13 | 1.04E-11  | Yes          | OK     | 598.8006979 | 419.9143554 | 777.6870404 | 417.720153  | 414.3098179 | 427.7130952 | 843.981674  | 745.1586404 | 743.920807   |
| <a href="#">FAT3</a>      | -1.479477636     | 0.202645316      | -7.300823268   | 2.86E-13 | 1.08E-11  | Yes          | OK     | 253.202296  | 120.783928  | 385.620664  | 143.1922795 | 82.65532526 | 136.5041793 | 427.0045895 | 292.1960653 | 437.6613371  |
| <a href="#">PUDP</a>      | 0.809272356      | 0.110919372      | 7.296041596    | 2.96E-13 | 1.12E-11  | Yes          | OK     | 841.4438473 | 1078.487296 | 604.4003983 | 1063.45349  | 1140.643489 | 1031.36491  | 613.3490581 | 644.2395174 | 555.6126194  |
| <a href="#">TNRC6A</a>    | 0.690100682      | 0.094592985      | 7.295474223    | 2.98E-13 | 1.12E-11  | Yes          | OK     | 1737.554033 | 2154.404441 | 1320.703625 | 2152.444457 | 2097.378879 | 2213.389989 | 1263.465635 | 1279.091209 | 1419.9554029 |
| <a href="#">PDGFRB</a>    | -1.82577601      | 0.250516459      | -7.288048125   | 3.14E-13 | 1.18E-11  | Yes          | OK     | 90.99479834 | 31.09190169 | 150.897695  | 22.8013184  | 33.0621301  | 37.41225656 | 129.5219401 | 204.1852022 | 118.9859427  |
| <a href="#">CEP164</a>    | -0.69105825      | 0.09483035       | -7.287310945   | 3.16E-13 | 1.18E-11  | Yes          | OK     | 1724.821577 | 1310.215987 | 2139.427168 | 1313.35594  | 1253.261369 | 1364.030651 | 2073.186666 | 2068.84202  | 2276.252817  |
| <a href="#">LAMC2</a>     | 0.789007098      | 0.108358203      | 7.281470834    | 3.30E-13 | 1.23E-11  | Yes          | OK     | 4811.521742 | 6133.444974 | 3489.598511 | 6446.388737 | 6738.475392 | 5215.470792 | 3624.943071 | 3547.424519 | 3296.427943  |
| <a href="#">PRKG</a>      | 0.847181778      | 0.116352139      | 7.281187819    | 3.31E-13 | 1.23E-11  | Yes          | OK     | 930.9357817 | 1205.452786 | 656.4187771 | 1116.352549 | 1348.314993 | 1151.690817 | 612.5134327 | 693.5256007 | 663.217298   |
| <a href="#">GLUL</a>      | -0.872284946     | 0.119869344      | -7.276964351   | 3.41E-13 | 1.27E-11  | Yes          | OK     | 1809.920346 | 1259.68565  | 2360.155042 | 1430.09869  | 1140.643489 | 1208.314773 | 2672.330092 | 2155.679405 | 2252.455628  |
| <a href="#">PRKCDBP</a>   | -0.867206919     | 0.119316696      | -7.268110393   | 3.65E-13 | 1.35E-11  | Yes          | OK     | 1479.274271 | 1031.766736 | 1926.781807 | 985.9290074 | 953.6358152 | 1155.735385 | 1789.909649 | 2193.230707 | 1797.205065  |
| <a href="#">ATP13A3</a>   | 0.688794499      | 0.094863706      | 7.260885444    | 3.85E-13 | 1.42E-11  | Yes          | OK     | 10104.82942 | 12526.5875  | 7683.071337 | 13262.15883 | 12491.28603 | 11826.31764 | 8469.063629 | 7117.145124 | 7463.005259  |
| <a href="#">NFATC2</a>    | 1.490474871      | 0.205329791      | 7.258931431    | 3.90E-13 | 1.43E-11  | Yes          | OK     | 311.0015817 | 474.8984719 | 147.1046915 | 359.3487779 | 644.711537  | 420.6351007 | 111.9738062 | 151.3786844 | 177.9615839  |
| <a href="#">DHTKD1</a>    | -1.040884183     | 0.143556643      | -7.250686312   | 4.15E-13 | 1.52E-11  | Yes          | OK     | 780.6361112 | 496.2497747 | 1065.022448 | 555.4401161 | 380.2144962 | 553.0947118 | 1092.162424 | 1114.804265 | 988.1006546  |
| <a href="#">NONO</a>      | -0.568325074     | 0.078425701      | -7.246668694   | 4.27E-13 | 1.56E-11  | Yes          | OK     | 6545.62993  | 5252.975067 | 7838.284792 | 5487.821312 | 5160.791871 | 5110.312017 | 7904.180845 | 7869.344634 | 7741.328898  |
| <a href="#">PIKFYVE</a>   | -0.684609636     | 0.09452086       | -7.242947575   | 4.39E-13 | 1.60E-11  | Yes          | OK     | 1320.638224 | 1006.246256 | 1635.030192 | 966.7759    | 1059.021355 | 992.9415118 | 1627.798318 | 1648.736834 | 1628.555424  |
| <a href="#">IDH2</a>      | -0.989635675     | 0.136741107      | -7.237294615   | 4.58E-13 | 1.67E-11  | Yes          | OK     | 445.5425124 | 291.6565868 | 599.4284379 | 274.5278735 | 323.3889601 | 277.0529269 | 642.5959478 | 620.7699539 | 534.919412   |
| <a href="#">NHLRC3</a>    | 0.80600912       | 0.111533478      | 7.22661153     | 4.95E-13 | 1.80E-11  | Yes          | OK     | 812.0414435 | 1040.465966 | 583.6169207 | 1093.55123  | 1018.726884 | 1009.119785 | 634.2396936 | 570.3103925 | 546.3006761  |
| <a href="#">TMTC3</a>     | 0.658772546      | 0.091216548      | 7.22207277     | 5.12E-13 | 1.85E-11  | Yes          | OK     | 3454.601526 | 4246.702148 | 2662.500904 | 4396.094187 | 4362.134791 | 3981.877468 | 2838.619551 | 2531.192421 | 2617.690739  |
| <a href="#">LIPH</a>      | 1.200674402      | 0.066547204      | 7.209213801    | 5.63E-13 | 2.03E-11  | Yes          | OK     | 587.2225409 | 835.4909029 | 338.954179  | 967.6879527 | 702.5702647 | 836.2144911 | 403.6070777 | 251.1243292 | 362.13113    |
| <a href="#">FAM136A</a>   | -0.67525669      | 0.093726168      | -7.204569483   | 5.82E-13 | 2.10E-11  | Yes          | OK     | 1556.434274 | 1190.484565 | 1922.383983 | 1221.238613 | 1199.535408 | 1150.679675 | 1880.99282  | 2028.943763 | 1857.215367  |
| <a href="#">MORC4</a>     | -0.78714028      | 0.109269997      | -7.203626805   | 5.86E-13 | 2.11E-11  | Yes          | OK     | 5577.793325 | 4048.32065  | 7107.266    | 4037.657462 | 3504.585791 | 4602.718698 | 7554.053795 | 6660.662115 | 7107.082091  |
| <a href="#">RARRES2</a>   | -1.339627165     | 0.185994777      | -7.202498825   | 5.91E-13 | 2.12E-11  | Yes          | OK     | 394.2987478 | 207.953875  | 580.6436206 | 231.6613949 | 136.3812867 | 255.8189435 | 664.3222087 | 529.2386564 | 548.3699968  |
| <a href="#">PJA2</a>      | -0.852291717     | 0.118532157      | -7.190383923   | 6.46E-13 | 2.31E-11  | Yes          | OK     | 2477.258115 | 1740.851001 | 3213.665229 | 1640.782872 | 1956.864826 | 1624.905305 | 3278.158522 | 3592.01669  | 2770.820474  |
| <a href="#">SACS</a>      | 0.699466342      | 0.097357533      | 7.184511776    | 6.74E-13 | 2.40E-11  | Yes          | OK     | 8675.767269 | 10788.64999 | 6562.884543 | 10873.49272 | 11590.34298 | 9902.114282 | 7040.979787 | 5982.39173  | 6665.282112  |
| <a href="#">ALDOA</a>     | -0.655327426     | 0.091217011      | -7.184267693   | 6.76E-13 | 2.40E-11  | Yes          | OK     | 13162.91613 | 10162.62152 | 16163.21075 | 10192.18932 | 9477.466233 | 10818.209   | 17471.25628 | 15684.70927 | 15333.6667   |
| <a href="#">FAM20C</a>    | -1.257797716     | 0.175317388      | -7.17440368    | 7.26E-13 | 2.58E-11  | Yes          | OK     | 663.3929982 | 369.570448  | 957.2155483 | 407.6875729 | 251.0655505 | 449.9582207 | 1001.079253 | 803.8325491 | 1066.734843  |
| <a href="#">SCN5A</a>     | -0.946658708     | 0.131955696      | -7.174064736   | 7.28E-13 | 2.58E-11  | Yes          | OK     | 526.9019795 | 352.7946621 | 701.009297  | 331.9871958 | 350.2519408 | 376.1448497 | 693.5690984 | 623.1169103 | 786.3418822  |
| <a href="#">COL6A3</a>    | -1.092337862     | 0.152381912      | -7.168422072   | 7.59E-13 | 2.68E-11  | Yes          | OK     | 763.3277837 | 470.9785017 | 1055.677066 | 383.9742018 | 550.6911046 | 478.2701987 | 859.0229315 | 1160.569914 | 1147.438352  |
| <a href="#">CTSW</a>      | -1.918608798     | 0.267839848      | -7.163268696   | 7.88E-13 | 2.77E-11  | Yes          | OK     | 62.3233735  | 18.30960422 | 106.3371428 | 18.24105472 | 13.43149036 | 23.25626759 | 97.76817411 | 138.4704245 | 82.77282971  |
| <a href="#">SFT2D2</a>    | -0.747650172     | 0.104395822      | -7.161686736   | 7.97E-13 | 2.80E-11  | Yes          | OK     | 2225.794309 | 1645.49381  | 2806.094808 | 1680.913192 | 1643.807781 | 1611.760458 | 2468.43749  | 3092.114988 | 2857.731946  |
| <a href="#">CDKN1B</a>    | 0.909930024      | 0.127088808      | 7.159837659    | 8.08E-13 | 2.83E-11  | Yes          | OK     | 903.3928016 | 1190.838996 | 615.9466074 | 1180.19624  | 1372.078399 | 1020.242348 | 655.1303291 | 592.6064778 | 600.1030154  |
| <a href="#">FAM179A</a>   | -1.664852589     | 0.232870793      | -7.149254613   | 8.73E-13 | 3.05E-11  | Yes          | OK     | 127.0072393 | 51.10585092 | 202.9086277 | 34.65800396 | 64.05787708 | 54.60167173 | 155.4263281 | 254.6447637 | 198.6547913  |
| <a href="#">BARD1</a>     | -0.818341313     | 0.114526811      | -7.145412545   | 8.97E-13 | 3.13E-11  | Yes          | OK     | 971.1309355 | 694.3835946 | 1247.878276 | 670.3587608 | 768.6945249 | 644.097498  | 1349.535053 | 1171.131217 | 1222.968559  |
| <a href="#">DCBLD1</a>    | 0.899909115      | 0.126195086      | 7.131094742    | 9.96E-13 | 3.46E-11  | Yes          | OK     | 916.4649466 | 1205.203119 | 627.7267746 | 1269.577408 | 1098.282634 | 1247.749313 | 691.8978476 | 528.0651782 | 663.217298   |
| <a href="#">GTF2E1</a>    | 0.96783637       | 0.13597174       | 7.11792294     | 1.10E-12 | 3.80E-11  | Yes          | OK     | 454.3831733 | 608.051335  | 300.7150117 | 588.2740146 | 675.707284  | 560.1727063 | 274.9207631 | 299.2369343 | 327.9873377  |
| <a href="#">TGFB2</a>     | 0.763564506      | 0.107281215      | 7.117411075    | 1.10E-12 | 3.81E-11  | Yes          | OK     | 2231.695208 | 2826.322709 | 1637.067707 | 3041.695874 | 2812.347442 | 2624.924811 | 1793.252151 | 1456.286414 | 1661.664556  |
| <a href="#">VPS36</a>     | 0.823344086      | 0.115714797      | 7.115287841    | 1.12E-12 | 3.85E-11  | Yes          | OK     | 1055.030313 | 1358.042541 | 752.0180838 | 1366.254998 | 1517.75841  | 1190.114215 | 751.2272524 | 773.3221165 | 731.5048825  |
| <a href="#">ADAM19</a>    | 1.059845415      | 0.149025217      | 7.11852862     | 1.14E-12 | 3.94E-11  | Yes          | OK     | 2153.433961 | 2953.216926 | 1353.650996 | 2555.571766 | 3724.655595 | 2579.423418 | 1116.395561 | 1477.409021 | 1467.148407  |
| <a href="#">PIGV</a>      | -1.026306699     | 0.144340749      | -7.110304671   | 1.16E-12 | 3.98E-11  | Yes          | OK     | 339.1111816 | 217.1506575 | 461.0717057 | 229.8372894 | 188.040865  | 233.573818  | 471.2927367 | 431.839968  | 480.0824123  |
| <a href="#">MEST</a>      | 1.269456353      | 0.178689967      | 7.104239687    | 1.21E-12 | 4.15E-11  | Yes          | OK     | 890.2950601 | 1288.635225 | 491.954895  | 1106.319969 | 1714.064808 | 1045.520899 | 428.6734303 | 621.9434321 | 425.2454126  |
| <a href="#">HIST1H2AI</a> | -0.763297726     | 0.107511421      | -7.099689672   | 1.25E-12 | 4.27E-11  |              |        |             |             |             |             |             |             |             |             |              |

## KO\_vs\_Control\_Differential\_Expr

| Gene Symbol                  | Log2 Fold Change | LFC Standard Err | Wald Statistic | p Value  | FDR Adj p | Val Significa | Status | Base Mean   | KD          | Control     | siCAM1_1    | siCAM1_2    | siCAM1_3    | siCon_1     | siCon_2     | siCon_3     |
|------------------------------|------------------|------------------|----------------|----------|-----------|---------------|--------|-------------|-------------|-------------|-------------|-------------|-------------|-------------|-------------|-------------|
| <a href="#">WARS</a>         | -0.651088645     | 0.091805552      | -7.09204       | 1.32E-12 | 4.48E-11  | Yes           | OK     | 2361.6077   | 1826.651307 | 2896.564093 | 1794.007731 | 1721.297149 | 1964.64904  | 2968.977116 | 2825.735443 | 2894.979719 |
| <a href="#">HIST1H2AG</a>    | -0.587247439     | 0.082824151      | -7.090292323   | 1.34E-12 | 4.53E-11  | Yes           | OK     | 6212.106306 | 4943.781686 | 7480.430927 | 4929.645037 | 5050.240373 | 4851.459647 | 7568.259427 | 7030.307739 | 7842.725615 |
| <a href="#">PRKAG2</a>       | 0.714955011      | 0.100890447      | 7.086449027    | 1.38E-12 | 4.65E-11  | Yes           | OK     | 1769.01295  | 2209.622003 | 1328.403896 | 2197.135041 | 2411.469115 | 2020.261854 | 1343.685675 | 1364.755116 | 1276.770898 |
| <a href="#">Ctorf43</a>      | 0.92499838       | 0.130765882      | 7.073698185    | 1.51E-12 | 5.08E-11  | Yes           | OK     | 501.4289153 | 663.6702381 | 339.1875924 | 658.5020753 | 655.0434527 | 677.4651863 | 320.0445358 | 307.4512815 | 390.06696   |
| <a href="#">MIR4658</a>      | 0.92499838       | 0.130765882      | 7.073698185    | 1.51E-12 | 5.08E-11  | Yes           | OK     | 501.4289153 | 663.6702381 | 339.1875924 | 658.5020753 | 655.0434527 | 677.4651863 | 320.0445358 | 307.4512815 | 390.06696   |
| <a href="#">STX12</a>        | 0.810834784      | 0.11465747       | 7.071800784    | 1.53E-12 | 5.14E-11  | Yes           | OK     | 903.4116006 | 1159.072692 | 647.7505088 | 1299.675149 | 1068.320079 | 1109.22285  | 668.5003358 | 630.1577793 | 644.5934113 |
| <a href="#">ANGPTL4</a>      | 1.544496483      | 0.218523964      | 7.067858634    | 1.57E-12 | 5.27E-11  | Yes           | OK     | 183.9954844 | 285.7933377 | 82.19763105 | 208.8600765 | 396.7455613 | 251.7743752 | 81.89129114 | 71.5821686  | 93.11943342 |
| <a href="#">LINC01505</a>    | -2.052218945     | 0.290709556      | -7.059344635   | 1.67E-12 | 5.59E-11  | Yes           | OK     | 44.68092533 | 9.704083077 | 79.65776759 | 11.85668557 | 3.099574697 | 14.15598897 | 86.06941824 | 68.06173408 | 84.84215045 |
| <a href="#">GBP4</a>         | -1.537918362     | 0.217927881      | -7.057006      | 1.70E-12 | 5.68E-11  | Yes           | OK     | 188.1837663 | 84.86647288 | 291.5010598 | 82.08474623 | 76.45617587 | 96.05849656 | 380.209566  | 190.1034642 | 304.1901492 |
| <a href="#">POP1</a>         | 0.828347399      | 0.11768711       | 7.03855673     | 1.94E-12 | 6.47E-11  | Yes           | OK     | 1214.599032 | 1566.411228 | 862.7868361 | 1673.61677  | 1576.650329 | 1448.966585 | 904.1467042 | 741.6382058 | 942.5755983 |
| <a href="#">TPM1</a>         | 0.644302588      | 0.091691522      | 7.026850184    | 2.11E-12 | 7.01E-11  | Yes           | OK     | 3049.262611 | 3733.739192 | 2364.78603  | 3841.566123 | 3816.609644 | 3543.04181  | 2446.711229 | 2186.189838 | 2461.457023 |
| <a href="#">CPX8</a>         | -0.684377655     | 0.097555716      | -7.015249201   | 2.30E-12 | 7.60E-11  | Yes           | OK     | 1355.695204 | 1032.57981  | 1678.810598 | 1015.114695 | 1026.992416 | 1055.63232  | 1746.457127 | 1729.706828 | 1560.26784  |
| <a href="#">CSNK1G1</a>      | -0.901312972     | 0.128484672      | -7.014945475   | 2.30E-12 | 7.60E-11  | Yes           | OK     | 686.7759502 | 470.0985872 | 903.4531333 | 521.6941649 | 417.4093926 | 471.1922042 | 888.2698212 | 822.6081998 | 994.9819187 |
| <a href="#">BHLHE40</a>      | -1.241373118     | 0.177208562      | -7.005153161   | 2.47E-12 | 8.13E-11  | Yes           | OK     | 818.7075311 | 459.5568635 | 1177.858199 | 387.6224127 | 621.9813226 | 369.0668552 | 1048.709902 | 1439.857719 | 1045.006975 |
| <a href="#">B3GNT5</a>       | 0.819522637      | 0.117111231      | 6.997814245    | 2.60E-12 | 8.52E-11  | Yes           | OK     | 1289.354744 | 1659.000687 | 919.7088013 | 1814.984944 | 1666.537996 | 1495.47912  | 1031.997393 | 850.771676  | 876.3573345 |
| <a href="#">ZNF185</a>       | 0.661889351      | 0.094584775      | 6.997642666    | 2.60E-12 | 8.52E-11  | Yes           | OK     | 2215.326822 | 2726.032057 | 1704.621587 | 2793.61753  | 2897.06915  | 2487.40949  | 1708.853983 | 1705.063787 | 1699.94699  |
| <a href="#">VEZF1</a>        | -0.631717066     | 0.090391338      | -6.988690289   | 2.77E-12 | 9.06E-11  | Yes           | OK     | 1752.310178 | 1367.013093 | 2137.607264 | 1375.375526 | 1309.053714 | 1416.610039 | 2166.776713 | 2071.188977 | 2174.856101 |
| <a href="#">ZFYVE28</a>      | -1.018228487     | 0.145860393      | -6.980842877   | 2.93E-12 | 9.56E-11  | Yes           | OK     | 580.6793931 | 372.9237854 | 788.4350008 | 358.4367252 | 329.5881095 | 430.7465214 | 667.6647104 | 802.6590709 | 894.9812212 |
| <a href="#">NAB1</a>         | -0.798685888     | 0.114507715      | -6.974952605   | 3.06E-12 | 9.95E-11  | Yes           | OK     | 1162.740486 | 838.2835654 | 1487.197407 | 844.5608334 | 894.743896  | 775.545967  | 1492.427    | 1641.695965 | 1327.469256 |
| <a href="#">CCHCR1</a>       | -0.714928934     | 0.10254702       | -6.971718289   | 3.13E-12 | 1.02E-11  | Yes           | OK     | 1143.901765 | 858.6241597 | 1429.17937  | 826.3197787 | 865.8145321 | 883.7381684 | 1403.01508  | 1538.429886 | 1346.093143 |
| <a href="#">ZNF267</a>       | 0.796206364      | 0.114235717      | 6.969854863    | 3.17E-12 | 1.03E-11  | Yes           | OK     | 724.9006253 | 926.3987128 | 523.4025377 | 990.4892711 | 947.4366658 | 841.2702015 | 528.9508907 | 628.0651782 | 513.1915442 |
| <a href="#">RBM24</a>        | 1.272092213      | 0.182550497      | 6.968440146    | 3.20E-12 | 1.03E-10  | Yes           | OK     | 297.5041225 | 431.898049  | 163.1101961 | 399.4790983 | 537.2596142 | 358.9554345 | 172.9744619 | 129.0825991 | 187.2735272 |
| <a href="#">CDON</a>         | -1.003872103     | 0.14407346       | -6.967779522   | 3.22E-12 | 1.04E-10  | Yes           | OK     | 585.2933622 | 379.208436  | 791.3782883 | 363.6354068 | 338.8868336 | 463.1030676 | 767.1041353 | 745.1586404 | 861.8720893 |
| <a href="#">B3GNT3</a>       | 1.674715837      | 0.240667307      | 6.95863456     | 3.44E-12 | 1.10E-10  | Yes           | OK     | 116.9019679 | 187.8488622 | 45.95507366 | 151.4007541 | 265.5302324 | 146.6156    | 37.60314389 | 51.63303965 | 48.62903745 |
| <a href="#">ALDH16A1</a>     | -0.749639989     | 0.107761515      | -6.956472225   | 3.49E-12 | 1.12E-10  | Yes           | OK     | 984.6730198 | 726.964095  | 1242.381945 | 697.7203429 | 702.5702647 | 780.6016773 | 1212.492484 | 1333.071205 | 1181.582144 |
| <a href="#">CAV1</a>         | -0.644322827     | 0.092683543      | -6.951857987   | 3.61E-12 | 1.15E-10  | Yes           | OK     | 13317.67259 | 10329.37978 | 16305.96539 | 10697.46654 | 10285.42204 | 10005.25077 | 18128.05786 | 15475.83016 | 15314.00816 |
| <a href="#">STMN3</a>        | 1.117728577      | 0.160818546      | 6.950246756    | 3.65E-12 | 1.16E-10  | Yes           | OK     | 1173.111133 | 1634.355241 | 711.8670251 | 1441.955375 | 1893.84014  | 1567.270207 | 604.9928039 | 938.782539  | 591.8257324 |
| <a href="#">YFATS2</a>       | -0.669244357     | 0.0965183        | -6.933859735   | 4.10E-12 | 1.30E-10  | Yes           | OK     | 1598.463073 | 1225.830232 | 1971.095914 | 1163.797291 | 1185.070726 | 1328.640679 | 1972.911616 | 1936.238987 | 2004.137139 |
| <a href="#">GMFB</a>         | -0.876131297     | 0.1264724        | -6.927450555   | 4.28E-12 | 1.36E-10  | Yes           | OK     | 3195.625987 | 2215.989983 | 4175.261992 | 2267.363101 | 2479.659758 | 1900.94709  | 4789.804906 | 4170.54143  | 3565.43964  |
| <a href="#">WT1</a>          | -1.614044047     | 0.233266528      | -6.919312679   | 4.54E-12 | 1.44E-10  | Yes           | OK     | 94.82566698 | 39.45142579 | 150.1999082 | 33.74595123 | 32.02893854 | 52.57938759 | 167.125084  | 157.2460753 | 126.2285653 |
| <a href="#">TYNLL2</a>       | -0.704741275     | 0.101857283      | -6.918909028   | 4.55E-12 | 1.44E-10  | Yes           | OK     | 1470.648137 | 1109.390443 | 1831.905831 | 1101.759705 | 1131.344765 | 1095.066861 | 1819.992164 | 1675.726832 | 1999.998498 |
| <a href="#">TCEA3</a>        | -1.26998556      | 0.183717401      | -6.912712422   | 4.75E-12 | 1.50E-10  | Yes           | OK     | 191.8236523 | 105.1874699 | 278.4598348 | 103.0619592 | 102.285965  | 110.2144855 | 228.961365  | 333.2678014 | 273.150338  |
| <a href="#">GNG11</a>        | -0.949992633     | 0.137442227      | -6.911941505   | 4.78E-12 | 1.50E-10  | Yes           | OK     | 1534.054394 | 1023.232141 | 2044.876647 | 1044.300383 | 856.515808  | 1168.880232 | 2414.121838 | 1791.901171 | 1928.606932 |
| <a href="#">BTBD10</a>       | 0.73369434       | 0.106198337      | 6.908717786    | 4.89E-12 | 1.53E-10  | Yes           | OK     | 2425.799046 | 3047.421671 | 1804.176421 | 3151.142202 | 3274.184072 | 2716.93874  | 1967.897864 | 1742.615088 | 1702.016311 |
| <a href="#">CTGF</a>         | 0.975663238      | 0.141411424      | 6.899465472    | 5.22E-12 | 1.63E-10  | Yes           | OK     | 2744.145669 | 3684.276989 | 1804.014348 | 3103.71546  | 4667.959494 | 3281.156014 | 1748.128378 | 1654.604225 | 2009.310441 |
| <a href="#">ACBD3</a>        | -0.678472424     | 0.098364896      | -6.897505611   | 5.29E-12 | 1.65E-10  | Yes           | OK     | 1170.42457  | 893.6576654 | 1447.191475 | 869.1862573 | 939.1711333 | 872.6156056 | 1468.193863 | 1487.970324 | 1385.410237 |
| <a href="#">ARL3</a>         | -0.985570228     | 0.142972543      | -6.893423076   | 5.45E-12 | 1.70E-10  | Yes           | OK     | 364.4721585 | 238.5351124 | 490.4092046 | 247.1662914 | 250.0323589 | 218.4066869 | 549.8415262 | 450.6156187 | 470.770469  |
| <a href="#">MARS2</a>        | 0.856269926      | 0.124375748      | 6.884540897    | 5.80E-12 | 1.80E-10  | Yes           | OK     | 604.5487483 | 785.8793821 | 423.2181146 | 735.1145051 | 883.3787887 | 739.1448525 | 419.4839607 | 408.3704045 | 441.7999786 |
| <a href="#">IPO11</a>        | -0.933329169     | 0.135588153      | -6.883559881   | 5.84E-12 | 1.81E-10  | Yes           | OK     | 1227.388204 | 825.7202601 | 1629.056149 | 767.0363508 | 960.8681562 | 749.2562732 | 1710.525234 | 1821.238126 | 1355.405086 |
| <a href="#">IPO11-LRRC70</a> | -0.933329169     | 0.135588153      | -6.883559881   | 5.84E-12 | 1.81E-10  | Yes           | OK     | 1227.388204 | 825.7202601 | 1629.056149 | 767.0363508 | 960.8681562 | 749.2562732 | 1710.525234 | 1821.238126 | 1355.405086 |
| <a href="#">ATL1</a>         | 1.006779652      | 0.14632525       | 6.880423274    | 5.97E-12 | 1.85E-10  | Yes           | OK     | 405.6808427 | 549.6470902 | 261.7145952 | 587.3619619 | 515.5625913 | 546.0167173 | 305.8389036 | 255.8182419 | 223.4866402 |
| <a href="#">GDPD5</a>        | 0.984877823      | 0.143443766      | 6.865950686    | 6.60E-12 | 2.04E-10  | Yes           | OK     | 452.8530396 | 609.0897799 | 296.6162994 | 556.3521689 | 595.176219  | 611.7409518 | 269.0713852 | 349.6964958 | 271.0810173 |
| <a href="#">FLT1</a>         | -0.643166952     | 0.093689757      | -6.864858808   | 6.66E-12 | 2.05E-10  | Yes           | OK     | 1998.829249 | 1550.572523 | 2447.085975 | 1533.160649 | 1620.044375 | 1498.512546 | 2379.861195 | 2616.856328 | 2344.540401 |
| <a href="#">SERBP1</a>       | 0.634433921      | 0.092463634      | 6.861442646    | 6.82E-12 | 2.09E-10  | Yes           | OK     | 7155.341381 | 8736.940534 | 5573.742228 | 8859.680276 | 9473.333467 | 7877.80786  | 5475.01775  | 5724.226532 | 5521.982402 |
| <a href="#">NEK7</a>         | -0.82400917      | 0.120095811      | -6.861264852   | 6.83E-12 | 2.09E-10  | Yes           | OK     | 2074.882917 | 1477.14412  | 2672.621713 | 1599.740499 | 1491.928621 | 1339.763242 | 3114.375939 | 2380.987215 | 2522.501985 |
| <a href="#">PLAGL2</a>       | 1.014688152      | 0.14833941       | 6.840314072    | 7.90E-12 | 2.42E-10  | Yes           | OK     | 358.2327423 | 485.7268991 | 230.7385856 | 441.4335241 | 500.0647178 | 515.6824552 | 195.5363482 | 245.2569383 | 251.4224702 |
| <a href="#">MAPK8IP2</a>     | 2.091031967      | 0.305733871      | 6.839386036    | 7.95E-12 | 2.43E-10  | Yes           | OK     | 39.32501976 | 72.24473123 | 6.405308301 | 43.77853132 | 97.10200718 | 75.83565518 | 3.342501679 | 11.73478174 | 4.138641485 |
| <a href="#">PAWR</a>         | 0.728742983      | 0.106564095      | 6.838541483    | 8.00E-12 | 2.44E-10  | Yes           | OK     | 2710.449647 | 3400.840942 | 2020.058352 | 3469.448607 | 3500.453025 | 3232.621195 | 2152.571081 | 1737.921175 | 2169.682799 |
| <a href="#">ATXN1</a>        | 0.642563254      | 0.093964623      | 6.83835295     | 8.01E-12 | 2.44E-10  | Yes           | OK     | 1690.823153 | 2069.185503 | 1312.460802 | 2023.845021 | 2018.85632  | 2164.85517  | 1241.739374 | 1323.68338  | 1371.959652 |
| <a href="#">TAF5</a>         |                  |                  |                |          |           |               |        |             |             |             |             |             |             |             |             |             |

## KO\_vs\_Control\_Differential\_Expr

| Gene Symbol               | Log2 Fold Change | LFC Standard Err | Wald Statistic | p Value  | FDR Adj p | Va Significa | Status | Base Mean   | KD          | Control     | siCAM1_1    | siCAM1_2    | siCAM1_3    | siCon_1     | siCon_2     | siCon_3     |
|---------------------------|------------------|------------------|----------------|----------|-----------|--------------|--------|-------------|-------------|-------------|-------------|-------------|-------------|-------------|-------------|-------------|
| <a href="#">RSL1D1</a>    | 0.625328927      | 0.0915406        | 6.831164805    | 8.42E-12 | 2.54E-10  | Yes          | OK     | 3665.058784 | 4463.981426 | 2866.136143 | 4742.674226 | 4404.495645 | 4244.774406 | 2927.195845 | 2669.662845 | 3001.549737 |
| <a href="#">C21orf58</a>  | -1.109590252     | 0.162448163      | -6.830426586   | 8.47E-12 | 2.55E-10  | Yes          | OK     | 257.2170204 | 156.4218984 | 358.0121424 | 136.8079104 | 179.7753324 | 152.6824524 | 325.8939137 | 394.2886664 | 353.853847  |
| <a href="#">USP53</a>     | 0.746260153      | 0.109300947      | 6.827572608    | 8.64E-12 | 2.59E-10  | Yes          | OK     | 1536.97978  | 1938.056483 | 1135.903078 | 2135.115455 | 1872.143117 | 1806.910877 | 1245.917501 | 1087.814267 | 1073.977465 |
| <a href="#">HIST1H2BL</a> | -1.045065141     | 0.153160772      | -6.823321186   | 8.90E-12 | 2.66E-10  | Yes          | OK     | 679.033893  | 429.040663  | 929.027123  | 392.1826764 | 524.8613154 | 370.0779973 | 921.694838  | 1074.906007 | 790.4805237 |
| <a href="#">FNDCA3A</a>   | 0.58603401       | 0.085922054      | 6.82053073     | 9.07E-12 | 2.71E-10  | Yes          | OK     | 2553.433985 | 3074.21628  | 2032.651689 | 3105.539566 | 3113.006188 | 3004.103087 | 2010.51476  | 2129.862885 | 1957.577423 |
| <a href="#">IL10RB</a>    | -0.83847025      | 0.122938722      | -6.820229106   | 9.09E-12 | 2.71E-10  | Yes          | OK     | 571.8064775 | 404.1847332 | 739.4282219 | 381.2380436 | 386.4136456 | 444.9025104 | 787.1591454 | 727.5564678 | 703.5690525 |
| <a href="#">TMX4</a>      | -0.753387703     | 0.110471855      | -6.819725264   | 9.12E-12 | 2.71E-10  | Yes          | OK     | 730.4272798 | 538.1473383 | 922.7072214 | 539.9352196 | 552.7574877 | 521.7493076 | 945.9279752 | 963.4255807 | 858.7681082 |
| <a href="#">GGCT</a>      | 0.675572448      | 0.099137807      | 6.814478403    | 9.46E-12 | 2.81E-10  | Yes          | OK     | 1506.478186 | 1861.620383 | 1151.33599  | 1925.343325 | 1951.698868 | 1707.818955 | 1158.176832 | 1110.110352 | 1185.720786 |
| <a href="#">SGMS2</a>     | 0.772920273      | 0.113429867      | 6.814080753    | 9.49E-12 | 2.81E-10  | Yes          | OK     | 2703.47838  | 3434.208535 | 1972.748226 | 3521.435613 | 3812.476878 | 2968.713115 | 2119.98169  | 2003.127243 | 1795.135744 |
| <a href="#">DLC1</a>      | 0.570552901      | 0.083764406      | 6.811400312    | 9.67E-12 | 2.86E-10  | Yes          | OK     | 3197.752116 | 3832.87724  | 2562.626993 | 3702.022055 | 4012.916041 | 3783.693622 | 2520.246266 | 2610.988937 | 2556.645778 |
| <a href="#">CEP19</a>     | -1.135147228     | 0.166713826      | -6.808956727   | 9.83E-12 | 2.90E-10  | Yes          | OK     | 217.3511311 | 130.1089323 | 304.5933298 | 133.1596994 | 110.5514975 | 146.6156    | 323.3870374 | 302.7573688 | 287.6355832 |
| <a href="#">BMP4</a>      | -0.955745925     | 0.140476953      | -6.803578118   | 1.02E-11 | 3.00E-10  | Yes          | OK     | 1918.888288 | 1274.383277 | 2563.393299 | 1171.075713 | 1035.257949 | 1616.816168 | 2405.765583 | 2706.040669 | 2578.373645 |
| <a href="#">BIRC2</a>     | -0.649163456     | 0.095416003      | -6.803507116   | 1.02E-11 | 3.00E-10  | Yes          | OK     | 3897.351099 | 3015.549293 | 4779.152905 | 3152.966308 | 6972.492135 | 2921.189438 | 5274.46765  | 4577.738356 | 4485.25271  |
| <a href="#">TWF1</a>      | -0.925373422     | 0.136141629      | -6.797137858   | 1.07E-11 | 3.13E-10  | Yes          | OK     | 810.4116543 | 547.5197386 | 1073.30357  | 543.5834306 | 609.5830238 | 489.3927614 | 1262.630009 | 1003.323839 | 953.9568624 |
| <a href="#">BAK1</a>      | 0.725814832      | 0.106868851      | 6.791640626    | 1.11E-11 | 3.24E-10  | Yes          | OK     | 1156.760441 | 1450.644476 | 862.8764056 | 1462.020536 | 1377.244357 | 1512.668535 | 949.2704768 | 808.5264618 | 830.8322782 |
| <a href="#">FBXW7</a>     | 0.700989678      | 0.103309018      | 6.78536774     | 1.16E-11 | 3.38E-10  | Yes          | OK     | 1128.313904 | 1404.597292 | 852.0305155 | 1423.714321 | 1437.169468 | 1352.908088 | 843.1460485 | 792.0977673 | 920.8477305 |
| <a href="#">STK4</a>      | 0.574054432      | 0.084730879      | 6.775032167    | 1.24E-11 | 3.62E-10  | Yes          | OK     | 3689.553082 | 4427.446645 | 2951.65952  | 4629.579687 | 4331.139044 | 4321.621203 | 3022.457143 | 2817.521095 | 3015.000322 |
| <a href="#">AIG1</a>      | -1.075900323     | 0.158821475      | -6.774274836   | 1.25E-11 | 3.64E-10  | Yes          | OK     | 470.7651823 | 292.1177209 | 649.4126437 | 310.0979302 | 237.6340601 | 328.6211724 | 743.7066236 | 535.1060473 | 669.4252603 |
| <a href="#">SKP2</a>      | 0.69126149       | 0.10212991       | 6.76845294     | 1.30E-11 | 3.78E-10  | Yes          | OK     | 1946.4037   | 2416.761114 | 1476.046286 | 2450.685701 | 2544.750826 | 2254.846814 | 1581.83892  | 1337.765118 | 1508.534821 |
| <a href="#">SPAG4</a>     | -1.309594662     | 0.193502483      | -6.76784424    | 1.31E-11 | 3.78E-10  | Yes          | OK     | 171.2197077 | 91.07591337 | 251.3635021 | 88.46911538 | 81.6221337  | 103.136491  | 249.8520005 | 300.4104125 | 203.8280932 |
| <a href="#">CHSY1</a>     | -0.814017644     | 0.120626419      | -6.748253427   | 1.50E-11 | 4.32E-10  | Yes          | OK     | 1037.207236 | 741.8512055 | 1332.563266 | 778.8930364 | 697.4043069 | 749.2562732 | 1455.659481 | 1135.926872 | 1406.103445 |
| <a href="#">MIR711</a>    | -1.73725187      | 0.257665138      | -6.742285291   | 1.56E-11 | 4.50E-10  | Yes          | OK     | 3562.887985 | 1272.3457   | 5853.430271 | 872.8344682 | 1646.907356 | 1297.295275 | 4649.419836 | 7455.106838 | 5455.764138 |
| <a href="#">COL7A1</a>    | -1.73725187      | 0.257665138      | -6.742285291   | 1.56E-11 | 4.50E-10  | Yes          | OK     | 3562.887985 | 1272.3457   | 5853.430271 | 872.8344682 | 1646.907356 | 1297.295275 | 4649.419836 | 7455.106838 | 5455.764138 |
| <a href="#">DAAM1</a>     | 0.795329623      | 0.11800591       | 6.739744009    | 1.59E-11 | 4.57E-10  | Yes          | OK     | 1311.654246 | 1676.168375 | 947.1401166 | 1576.93918  | 1825.649497 | 1625.916447 | 860.6941824 | 1087.814267 | 892.9119005 |
| <a href="#">SSR3</a>      | 0.77840615       | 0.115503056      | 6.734372604    | 1.65E-11 | 4.73E-10  | Yes          | OK     | 8386.106169 | 10669.4435  | 6102.768841 | 11056.81532 | 11543.84936 | 9407.665811 | 6971.622877 | 5317.029606 | 6019.65404  |
| <a href="#">WWC1</a>      | 0.99648422       | 0.148247358      | 6.721767122    | 1.80E-11 | 5.14E-10  | Yes          | OK     | 2505.333883 | 3384.465333 | 1626.202432 | 3269.709058 | 4114.168815 | 2769.518127 | 1493.262625 | 1976.137245 | 1409.207426 |
| <a href="#">ITPR2</a>     | 0.72743996       | 0.108238168      | 6.720734218    | 1.81E-11 | 5.17E-10  | Yes          | OK     | 1203.284703 | 1509.254145 | 897.3152602 | 1551.401704 | 1637.608632 | 1338.752099 | 904.9823296 | 893.0168903 | 893.9465608 |
| <a href="#">SS18</a>      | -0.6103167       | 0.09084832       | -6.717974505   | 1.84E-11 | 5.26E-10  | Yes          | OK     | 2304.597217 | 1814.551959 | 2794.642476 | 1788.535415 | 1935.167803 | 1719.952659 | 2888.757076 | 2747.112405 | 2748.057946 |
| <a href="#">ZSCAN18</a>   | -0.991463573     | 0.147804419      | -6.707942676   | 1.97E-11 | 5.62E-10  | Yes          | OK     | 483.4966488 | 314.6162822 | 652.3770153 | 307.361772  | 259.331083  | 377.1559918 | 650.1165766 | 605.5147377 | 701.4997318 |
| <a href="#">ANKRD28</a>   | -0.767350506     | 0.114455293      | -6.704368917   | 2.02E-11 | 5.75E-10  | Yes          | OK     | 4772.457736 | 3491.151724 | 6053.763749 | 3277.917533 | 4133.799455 | 3061.738185 | 6050.763664 | 6330.914748 | 5779.612834 |
| <a href="#">LACTB</a>     | 0.670708577      | 0.100122926      | 6.698851122    | 2.10E-11 | 5.96E-10  | Yes          | OK     | 1430.682968 | 1765.905016 | 1095.460921 | 1877.916583 | 1758.492045 | 1661.306419 | 1159.012457 | 1085.467311 | 1041.902994 |
| <a href="#">PHF14</a>     | 0.701967581      | 0.104821641      | 6.696781093    | 2.13E-11 | 6.03E-10  | Yes          | OK     | 1583.723626 | 1971.563789 | 1195.883463 | 2081.304343 | 1902.105673 | 1931.281352 | 1082.134919 | 1194.600781 | 1310.91469  |
| <a href="#">RPL39L</a>    | -0.869778019     | 0.129976032      | -6.6918339     | 2.20E-11 | 6.23E-10  | Yes          | OK     | 442.5428725 | 307.4503566 | 577.6353884 | 312.8340884 | 274.8289565 | 334.6880249 | 596.6365497 | 570.3103925 | 565.9592231 |
| <a href="#">F2R</a>       | -0.747125179     | 0.111790084      | -6.683286655   | 2.34E-11 | 6.59E-10  | Yes          | OK     | 696.3207259 | 514.384348  | 878.2571037 | 495.2446356 | 538.2928058 | 509.6156028 | 889.1054466 | 920.0068883 | 825.6589763 |
| <a href="#">POLR1C</a>    | 0.637024146      | 0.095380564      | 6.678762653    | 2.41E-11 | 6.78E-10  | Yes          | OK     | 1415.009977 | 1729.738682 | 1100.281272 | 1762.997938 | 1775.02311  | 1651.194999 | 1148.149327 | 1098.375571 | 1054.318918 |
| <a href="#">TRIM47</a>    | -0.888280283     | 0.13302344       | -6.677622231   | 2.43E-11 | 6.82E-10  | Yes          | OK     | 581.2648938 | 399.9620282 | 762.5677594 | 356.6126197 | 378.1481131 | 465.1253518 | 722.8159881 | 747.5055967 | 817.3816934 |
| <a href="#">ITGA5</a>     | 0.627179761      | 0.09401468       | 6.671083295    | 2.54E-11 | 7.12E-10  | Yes          | OK     | 5435.819072 | 6625.932699 | 4245.705444 | 6586.844858 | 6609.326446 | 6681.626792 | 4498.171635 | 3769.211894 | 4469.732804 |
| <a href="#">CAPN15</a>    | 0.987424127      | 0.14809874       | 6.66733643     | 2.60E-11 | 7.29E-10  | Yes          | OK     | 1437.081386 | 1936.714325 | 937.4484464 | 1672.704718 | 2314.349107 | 1823.089151 | 759.5835066 | 1119.498178 | 933.263655  |
| <a href="#">GAPDH</a>     | -0.574759151     | 0.086276991      | -6.66178948    | 2.71E-11 | 7.55E-10  | Yes          | OK     | 37145.34474 | 29705.69303 | 44584.99645 | 28844.95782 | 31192.05337 | 29080.44591 | 47157.68494 | 45519.21836 | 41078.08606 |
| <a href="#">PDHX</a>      | 0.736531089      | 0.110586074      | 6.660251739    | 2.73E-11 | 7.62E-10  | Yes          | OK     | 1722.264647 | 2166.326582 | 1278.202712 | 2089.512818 | 2457.962735 | 1951.504193 | 1348.699427 | 1265.009471 | 1220.899238 |
| <a href="#">DUSP22</a>    | 0.714586531      | 0.107312806      | 6.658911993    | 2.76E-11 | 7.67E-10  | Yes          | OK     | 847.5460312 | 1058.832355 | 636.2597073 | 1049.772699 | 1103.448592 | 1023.275774 | 594.1296734 | 670.0560372 | 644.5934113 |
| <a href="#">E2F7</a>      | 0.772734657      | 0.116070565      | 6.657455834    | 2.79E-11 | 7.73E-10  | Yes          | OK     | 4651.98116  | 5910.92463  | 3393.03769  | 6276.746928 | 5107.06591  | 6348.961052 | 3438.598602 | 2971.246736 | 3769.267733 |
| <a href="#">ADIRF</a>     | -1.031014071     | 0.154893428      | -6.656280283   | 2.81E-11 | 7.78E-10  | Yes          | OK     | 231.7447056 | 147.3134029 | 316.1760084 | 140.4561213 | 149.812777  | 151.6713104 | 311.6882816 | 336.7882359 | 300.0515077 |
| <a href="#">ATP9A</a>     | -1.300344652     | 0.195470403      | -6.652386402   | 2.88E-11 | 7.97E-10  | Yes          | OK     | 157.7487559 | 84.40663488 | 231.090877  | 62.01958604 | 99.18639031 | 92.01392828 | 220.6051108 | 234.6956348 | 237.9718854 |
| <a href="#">CLCN5</a>     | 0.910963217      | 0.136949605      | 6.651813409    | 2.90E-11 | 7.97E-10  | Yes          | OK     | 1002.41727  | 1323.879172 | 680.9553671 | 1433.746901 | 1180.93796  | 1356.952657 | 690.2265967 | 553.881698  | 798.7578067 |
| <a href="#">ATP8B1</a>    | 0.921139992      | 0.138483241      | 6.651635134    | 2.90E-11 | 7.97E-10  | Yes          | OK     | 1609.570255 | 2131.576169 | 1087.564341 | 2516.353498 | 1783.288643 | 2095.086367 | 1184.08122  | 909.4455847 | 1169.16622  |
| <a href="#">DNAJB12</a>   | -0.645542653     | 0.097052273      | -6.651494446   | 2.90E-11 | 7.97E-10  | Yes          | OK     | 1214.865667 | 940.9577864 | 1488.773547 | 966.7759    | 883.3787887 | 972.7186704 | 1707.358742 | 1511.439888 | 1477.49501  |
| <a href="#">ZMYM3</a>     | -0.737413632     | 0.111022655      | -6.642010417   | 3.09E-11 | 8.49E-10  | Yes          | OK     | 959.4210678 | 711.7927043 | 1207.049431 | 653.9418116 | 716.0017551 | 765.4345463 | 1118.066812 | 1261.489037 | 1241.592446 |
| <a href="#">HNRNP2</a>    | -0.756608666     | 0.113930955      | -6.640940286   | 3.12E-11 | 8.53E-10  | Yes          | OK     | 1568.900239 | 1153.756316 | 1984.044162 | 1198.437295 | 1084.851144 | 1177.98051  | 2278.75052  | 1865.830296 | 1807.551669 |
| <a href="#">R3HDM2</a>    | -1.210484941     | 0.182295964      | -6.640217986   | 3.13E    |           |              |        |             |             |             |             |             |             |             |             |             |

Supplementary Table 3. Mass Spec Analysis of ICAM1-Regulated Proteins (related to Fig. 3)

| #    | Identified Proteins (2282/2286)                                                                             | Accession / Alternate ID | Molecular | siCON1 | siCON2 | siCON 3 | siICAM1 | siICAM2 | siICAM3 | Fold(con/si | Ttest 2-side |
|------|-------------------------------------------------------------------------------------------------------------|--------------------------|-----------|--------|--------|---------|---------|---------|---------|-------------|--------------|
| 1776 | Exosome complex component RRP45 OS=Homo sapiens OX=9606 GN=EXOSC9 PE=1 SV=5                                 | EXOSC9_HU EXOSC9         | 49 kDa    |        |        | 3       | 2       | 0       | 0       | #DIV/0!     | 0.0377       |
| 1252 | Pinin OS=Homo sapiens OX=9606 GN=PNN PE=1 SV=5                                                              | PINN_HU PNN              | 82 kDa    | 1      | 2      | 3       | 0       | 0       | 0       | #DIV/0!     | 0.0257       |
| 717  | DNA replication licensing factor MCM3 OS=Homo sapiens OX=9606 GN=MCM3 PE=1 SV=1                             | MCM3_HU MCM3             | 91 kDa    | 10     | 16     | 19      |         | 1       | 1       | 15.00       | 0.0263       |
| 1216 | Anillin OS=Homo sapiens OX=9606 GN=ANLN PE=1 SV=2                                                           | ANLN_HU ANLN             | 124 kDa   | 4      | 7      | 6       |         | 0       | 1       | 11.33       | 0.0230       |
| 1219 | Condensin complex subunit 1 OS=Homo sapiens OX=9606 GN=NCAPD2 PE=1 SV=1                                     | CND1_HU NCAPD2           | 157 kDa   | 7      | 6      | 4       |         | 1       | 0       | 11.33       | 0.0230       |
| 809  | UTP--glucose-1-phosphate uridylyltransferase OS=Homo sapiens OX=9606 GN=UGPA_HU UGP2                        | UGPA_HU UGP2             | 57 kDa    | 7      | 7      | 6       | 2       | 0       | 0       | 10.00       | 0.0013       |
| 1259 | Cluster of Metastasis-associated protein MTA2 OS=Homo sapiens OX=9606 GN=MTA2_HU MTA2                       | MTA2_HU MTA2             | 75 kDa    | 5      | 6      | 6       | 1       | 0       | 1       | 8.50        | 0.0004       |
| 1095 | Major prion protein OS=Homo sapiens OX=9606 GN=PRNP PE=1 SV=1                                               | PRIO_HU PRNP             | 28 kDa    | 8      | 4      | 4       | 0       | 2       | 0       | 8.00        | 0.0352       |
| 1261 | Nuclear cap-binding protein subunit 1 OS=Homo sapiens OX=9606 GN=NCBP1 PE=1 SV=1                            | NCBP1_HU NCBP1           | 92 kDa    | 7      | 8      | 4       | 1       | 1       | 1       | 6.33        | 0.0114       |
| 690  | Protein transport protein Sec23A OS=Homo sapiens OX=9606 GN=SEC23A PE=1 SV=1                                | SEC23A_HU SEC23A         | 86 kDa    | 22     | 17     | 16      | 4       | 4       | 1       | 6.11        | 0.0019       |
| 1331 | SUMO-activating enzyme subunit 2 OS=Homo sapiens OX=9606 GN=UBA2 PE=1 SV=1                                  | SAE2_HU UBA2             | 71 kDa    | 5      | 3      | 4       | 1       | 1       | 0       | 6.00        | 0.0075       |
| 1562 | Histone-arginine methyltransferase CARM1 OS=Homo sapiens OX=9606 GN=CAF CARM1_HU CARM1                      | CAF CARM1_HU CARM1       | 66 kDa    | 3      | 3      | 2       | 1       | 0       |         | 5.33        | 0.0319       |
| 1033 | N(G),N(G)-dimethylarginine dimethylaminohydrolase 2 OS=Homo sapiens OX=9606 GN=DDAH2_HU DDAH2               | DDAH2_HU DDAH2           | 30 kDa    | 5      | 7      | 4       | 1       | 1       | 1       | 5.33        | 0.0080       |
| 1559 | Unconventional myosin-1b OS=Homo sapiens OX=9606 GN=MYO1B PE=1 SV=3                                         | MYO1B_HU MYO1B           | 132 kDa   | 2      | 3      | 3       | 0       | 1       |         | 5.33        | 0.0319       |
| 1403 | Cleavage stimulation factor subunit 1 OS=Homo sapiens OX=9606 GN=CSTF1 PE=1 SV=1                            | CSTF1_HU CSTF1           | 48 kDa    |        | 3      | 3       | 0       | 1       | 1       | 4.50        | 0.0123       |
| 1289 | Zinc finger Ran-binding domain-containing protein 2 OS=Homo sapiens OX=9606 GN=ZRAB2_HU ZRANB2              | ZRAB2_HU ZRANB2          | 37 kDa    | 4      | 4      | 5       | 0       | 2       | 1       | 4.33        | 0.0075       |
| 1242 | Protein phosphatase 1F OS=Homo sapiens OX=9606 GN=PPM1F PE=1 SV=3                                           | PPM1F_HU PPM1F           | 50 kDa    | 6      | 4      | 7       | 1       | 1       | 2       | 4.25        | 0.0101       |
| 917  | NAD(P) transhydrogenase, mitochondrial OS=Homo sapiens OX=9606 GN=NTMT_HU NNT                               | NTMT_HU NNT              | 114 kDa   | 9      | 10     | 6       | 3       | 1       | 2       | 4.17        | 0.0090       |
| 571  | Cluster of Leucine-rich repeat flightless-interacting protein 1 OS=Homo sapiens OX=9606 GN=LRRF1_HU LRRFIP1 | LRRF1_HU LRRFIP1         | 89 kDa    | 10     | 13     | 12      | 4       | 2       | 3       | 3.89        | 0.0012       |
| 997  | Adenine phosphoribosyltransferase OS=Homo sapiens OX=9606 GN=APRT PE=1 SV=1                                 | APT_HU APRT              | 20 kDa    | 10     | 8      | 4       | 2       | 3       | 1       | 3.67        | 0.0453       |
| 1305 | Lymphokine-activated killer T-cell-originated protein kinase OS=Homo sapiens OX=9606 GN=TOPK_HU PBK         | TOPK_HU PBK              | 36 kDa    | 4      | 5      | 5       | 2       | 1       | 1       | 3.50        | 0.0021       |
| 228  | Cluster of Microtubule-associated protein 1B OS=Homo sapiens OX=9606 GN=MAP1B_HU MAP1B                      | MAP1B_HU MAP1B           | 271 kDa   | 25     | 36     | 40      | 10      | 9       | 11      | 3.37        | 0.0064       |
| 1458 | Thymidylate synthase OS=Homo sapiens OX=9606 GN=TYMS PE=1 SV=3                                              | TYSY_HU TYMS             | 36 kDa    | 4      | 5      | 4       | 2       | 1       | 1       | 3.25        | 0.0031       |
| 1353 | Protein KRI1 homolog OS=Homo sapiens OX=9606 GN=KRI1 PE=1 SV=3                                              | KRI1_HU KRI1             | 83 kDa    |        | 5      | 7       | 3       | 2       | 1       | 3.00        | 0.0321       |
| 987  | Structural maintenance of chromosomes protein 4 OS=Homo sapiens OX=9606 GN=SMC4_HU SMC4                     | SMC4_HU SMC4             | 147 kDa   | 8      | 7      | 6       | 3       | 2       | 2       | 3.00        | 0.0022       |
| 901  | 1,4-alpha-glucan-branching enzyme OS=Homo sapiens OX=9606 GN=GLBG PE=1 SV=1                                 | GLBG_HU GLBG             | 80 kDa    | 8      | 5      | 4       | 2       | 2       | 2       | 2.83        | 0.0380       |
| 1188 | Cleavage stimulation factor subunit 3 OS=Homo sapiens OX=9606 GN=CSTF3 PE=1 SV=1                            | CSTF3_HU CSTF3           | 83 kDa    | 6      | 5      | 6       | 2       | 0       | 4       | 2.83        | 0.0380       |
| 1153 | Protein mago nashi homolog 2 OS=Homo sapiens OX=9606 GN=MAGOHB PE=1 SV=1                                    | MGN2_HU MAGOHB           | 17 kDa    | 6      | 4      | 4       | 1       | 1       | 3       | 2.80        | 0.0335       |
| 1455 | Kinesin-like protein KIF11 OS=Homo sapiens OX=9606 GN=KIF11 PE=1 SV=2                                       | KIF11_HU KIF11           | 119 kDa   | 4      | 4      | 4       | 2       | 1       |         | 2.67        | 0.0068       |
| 1332 | ATP-dependent RNA helicase DDX18 OS=Homo sapiens OX=9606 GN=DDX18 PE=1 SV=1                                 | DDX18_HU DDX18           | 75 kDa    | 5      | 5      | 3       | 2       | 2       | 1       | 2.60        | 0.0232       |
| 1073 | Glycerol-3-phosphate dehydrogenase, mitochondrial OS=Homo sapiens OX=9606 GN=GPDM_HU GPD2                   | GPDM_HU GPD2             | 81 kDa    | 7      | 7      | 4       | 2       | 2       | 3       | 2.57        | 0.0254       |
| 655  | UV excision repair protein RAD23 homolog B OS=Homo sapiens OX=9606 GN=RAD23B_HU RAD23B                      | RAD23B_HU RAD23B         | 43 kDa    | 17     | 9      | 15      | 6       | 6       | 4       | 2.56        | 0.0288       |
| 1265 | Adenylate kinase isoenzyme 6 OS=Homo sapiens OX=9606 GN=AK6 PE=1 SV=1                                       | KAD6_HU AK6              | 20 kDa    | 5      | 6      | 4       | 2       | 2       | 2       | 2.50        | 0.0065       |
| 961  | Prolyl 4-hydroxylase subunit alpha-1 OS=Homo sapiens OX=9606 GN=P4HA1 PE=1 SV=1                             | P4HA1_HU P4HA1           | 61 kDa    | 10     | 10     | 10      | 6       | 2       | 4       | 2.50        | 0.0065       |
| 1170 | Transcription elongation factor A protein 1 OS=Homo sapiens OX=9606 GN=TCE1_HU TCEA1                        | TCE1_HU TCEA1            | 34 kDa    | 4      | 5      | 6       | 3       | 1       | 2       | 2.50        | 0.0213       |
| 1066 | Cluster of DNA replication licensing factor MCM4 OS=Homo sapiens OX=9606 GN=MCM4_HU MCM4                    | MCM4_HU MCM4             | 97 kDa    | 8      | 11     | 8       | 3       | 4       | 4       | 2.45        | 0.0072       |
| 1129 | Exosome complex component RRP4 OS=Homo sapiens OX=9606 GN=EXOSC2 PE=1 SV=1                                  | EXOSC2_HU EXOSC2         | 33 kDa    | 8      | 7      | 7       | 3       | 3       | 3       | 2.44        | 0.0002       |
| 1408 | Omega-amidase NIT2 OS=Homo sapiens OX=9606 GN=NIT2 PE=1 SV=1                                                | NIT2_HU NIT2             | 31 kDa    | 4      | 3      | 4       | 1       | 2       |         | 2.44        | 0.0319       |
| 830  | SUMO-activating enzyme subunit 1 OS=Homo sapiens OX=9606 GN=SAE1 PE=1 SV=1                                  | SAE1_HU SAE1             | 38 kDa    | 8      | 8      | 8       | 2       | 4       | 4       | 2.40        | 0.0022       |
| 947  | Tyrosine-protein kinase receptor UFO OS=Homo sapiens OX=9606 GN=AXL PE=1 SV=1                               | UFO_HU AXL               | 98 kDa    | 6      | 11     | 7       | 4       | 2       | 4       | 2.40        | 0.0488       |
| 395  | Alanine--tRNA ligase, cytoplasmic OS=Homo sapiens OX=9606 GN=AARS PE=1 SV=1                                 | SVSYAC_HU AARS           | 107 kDa   | 21     | 17     | 18      | 9       | 4       | 11      | 2.33        | 0.0114       |
| 1093 | S-adenosylmethionine synthase isoform type-2 OS=Homo sapiens OX=9606 GN=METK2_HU MAT2A                      | METK2_HU MAT2A           | 44 kDa    | 4      | 6      | 4       | 2       | 2       | 2       | 2.33        | 0.0161       |
| 1030 | ATP synthase subunit O, mitochondrial OS=Homo sapiens OX=9606 GN=ATP5O_HU ATP5O                             | ATP5O_HU ATP5O           | 23 kDa    | 5      | 4      | 7       | 2       | 2       | 3       | 2.29        | 0.0335       |
| 814  | Cytoskeleton-associated protein 5 OS=Homo sapiens OX=9606 GN=CKAP5 PE=1 SV=1                                | CKAP5_HU CKAP5           | 226 kDa   | 5      | 8      | 5       | 2       | 3       | 3       | 2.25        | 0.0341       |
| 1506 | Deoxycytidylate deaminase OS=Homo sapiens OX=9606 GN=DCTD PE=1 SV=2                                         | DCTD_HU DCTD             | 20 kDa    | 3      | DCTD   | 3       | 2       | 1       | 1       | 2.25        | 0.0075       |
| 926  | Chromodomain-helicase-DNA-binding protein 4 OS=Homo sapiens OX=9606 GN=CHD4_HU CHD4                         | CHD4_HU CHD4             | 218 kDa   | 7      | 7      | 6       | 3       | 2       | 4       | 2.22        | 0.0053       |
| 860  | tRNA (cytosine(34)-C(5))-methyltransferase OS=Homo sapiens OX=9606 GN=NSL NSUN2_HU NSUN2                    | NSL NSUN2_HU NSUN2       | 86 kDa    | 7      | 6      | 7       | 2       | 5       | 2       | 2.22        | 0.0254       |
| 1421 | Sphingolipid delta(4)-desaturase DES1 OS=Homo sapiens OX=9606 GN=DEGS1_HU DEGS1                             | DEGS1_HU DEGS1           | 38 kDa    | 4      | 3      | 4       | 2       | 2       | 1       | 2.20        | 0.0132       |
| 1205 | pre-rRNA processing protein FTSJ3 OS=Homo sapiens OX=9606 GN=FTSJ3 PE=1 SV=1                                | SPB1_HU FTSJ3            | 97 kDa    | 4      | 5      | 6       | 3       | 1       | 3       | 2.14        | 0.0390       |
| 1154 | NHL repeat-containing protein 2 OS=Homo sapiens OX=9606 GN=NHLRC2 PE=1 SV=1                                 | NHLRC2_HU NHLRC2         | 79 kDa    | 5      | 6      | 6       | 4       | 2       | 2       | 2.13        | 0.0158       |

Mass Spec Analysis of ICAM1-Regulated Proteins

| #    | Identified Proteins (2282/2286)                                                                                 | Accession / Alternate ID | Molecular | siCON1 | siCON2 | siCON 3 | siICAM1 | siICAM2 | siICAM3 | Fold(con/si | Ttest 2-side |
|------|-----------------------------------------------------------------------------------------------------------------|--------------------------|-----------|--------|--------|---------|---------|---------|---------|-------------|--------------|
| 1206 | U3 small nucleolar RNA-interacting protein 2 OS=Homo sapiens OX=9606 GN=RRU3IP2_HUI RRP9                        |                          | 52 kDa    | 6      | 7      | 6       | 4       | 3       | 2       | 2.11        | 0.0075       |
| 620  | Probable ubiquitin carboxyl-terminal hydrolase FAF-X OS=Homo sapiens OX=960 USP9X_HU USP9X                      |                          | 292 kDa   | 11     | 9      | 13      | 5       | 7       | 4       | 2.06        | 0.0175       |
| 1560 | Actin-related protein 2/3 complex subunit 5-like protein OS=Homo sapiens OX=9 ARP5L_HU ARPC5L                   |                          | 17 kDa    | 2      | 3      | 3       | 1       | 1       | 2       | 2.00        | 0.0474       |
| 1155 | ATP-dependent 6-phosphofructokinase, liver type OS=Homo sapiens OX=9606 G PFKAL_HUI PFKL                        |                          | 85 kDa    | 9      | 9      | 8       | 6       | 2       | 5       | 2.00        | 0.0255       |
| 1696 | Carbonyl reductase [NADPH] 3 OS=Homo sapiens OX=9606 GN=CBR3 PE=1 SV=3 CBR3_HUM CBR3                            |                          | 31 kDa    | 6      | 10     | 8       | 4       | 4       | 4       | 2.00        | 0.0257       |
| 1376 | Cleavage and polyadenylation specificity factor subunit 2 OS=Homo sapiens OX= CP5F2_HUI CP5F2                   |                          | 88 kDa    | 2      | 3      | 3       | 1       | 1       | 2       | 2.00        | 0.0474       |
| 1069 | Cold-inducible RNA-binding protein OS=Homo sapiens OX=9606 GN=CIRBP PE=1 CIRBP_HUI CIRBP                        |                          | 19 kDa    | 6      | 9      | 9       | 3       | 4       | 5       | 2.00        | 0.0257       |
| 1627 | General transcription factor IIF subunit 1 OS=Homo sapiens OX=9606 GN=GTTF2 T2FA_HUM GTTF2F1                    |                          | 58 kDa    | 3      | 2      | 3       | 1       | 1       | 2       | 2.00        | 0.0474       |
| 1156 | Phosphoserine aminotransferase OS=Homo sapiens OX=9606 GN=PSAT1 PE=1 S SERC_HUM PSAT1                           |                          | 40 kDa    | 4      | 4      | 6       | 2       | 2       | 3       | 2.00        | 0.0352       |
| 618  | Phosphoribosylformylglycinamide synthase OS=Homo sapiens OX=9606 GN=PF PUR4_HUM PFAS                            |                          | 145 kDa   | 7      | 11     | 9       | 5       | 5       | 4       | 1.93        | 0.0226       |
| 1079 | Small glutamine-rich tetratricopeptide repeat-containing protein alpha OS=Homo sapiens OX=9606 GN=SGTA_HUM SGTA |                          | 34 kDa    | 5      | 6      | 6       | 4       | 2       | 3       | 1.89        | 0.0161       |
| 721  | Cluster of Cullin-4B OS=Homo sapiens OX=9606 GN=CUL4B PE=1 SV=4 (CUL4B_HU CUL4B                                 |                          | 104 kDa   | 11     | 8      | 9       | 3       | 5       | 7       | 1.87        | 0.0406       |
| 707  | Lon protease homolog, mitochondrial OS=Homo sapiens OX=9606 GN=LONP1 PE=LONM_HU LONP1                           |                          | 106 kDa   | 8      | 12     | 8       | 5       | 6       | 4       | 1.87        | 0.0406       |
| 1282 | Polyadenylate-binding protein-interacting protein 1 OS=Homo sapiens OX=9606 PAIP1_HUI PAIP1                     |                          | 54 kDa    | 4      | 4      | 5       | 2       | 2       | 3       | 1.86        | 0.0132       |
| 1323 | Small nuclear ribonucleoprotein E OS=Homo sapiens OX=9606 GN=SNRPE PE=1 RUXE_HUM SNRPE                          |                          | 11 kDa    | 5      | 4      | 4       | 3       | 2       | 2       | 1.86        | 0.0132       |
| 1228 | Structural maintenance of chromosomes protein 1A OS=Homo sapiens OX=9606 SMC1A_HU SMC1A                         |                          | 143 kDa   | 4      | 3      | 4       | 2       | 2       | 2       | 1.83        | 0.0075       |
| 771  | Deoxyuridine 5'-triphosphate nucleotidohydrolase, mitochondrial OS=Homo sapiens OX=9606 GN=DUT_HUM DUT          |                          | 27 kDa    | 10     | 10     | 11      | 4       | 7       | 6       | 1.82        | 0.0078       |
| 1130 | Golgi resident protein GCP60 OS=Homo sapiens OX=9606 GN=ACBD3 PE=1 SV=4 GCP60_HU ACBD3                          |                          | 61 kDa    | 6      | 8      | 6       | 3       | 3       | 5       | 1.82        | 0.0335       |
| 1023 | Histone H1.0 OS=Homo sapiens OX=9606 GN=H1F0 PE=1 SV=3 H10_HUM H1F0                                             |                          | 21 kDa    | 5      | 6      | 7       | 3       | 4       | 3       | 1.80        | 0.0161       |
| 227  | E3 ubiquitin-protein ligase HUWE1 OS=Homo sapiens OX=9606 GN=HUWE1 PE=1 HUWE1_HU HUWE1                          |                          | 482 kDa   | 25     | 18     | 27      | 17      | 11      | 11      | 1.79        | 0.0379       |
| 142  | Pre-mRNA-processing-splicing factor 8 OS=Homo sapiens OX=9606 GN=PRPF8 PE=1 PRPF8_HUM PRPF8                     |                          | 274 kDa   | 32     | 29     | 27      | 14      | 20      | 16      | 1.76        | 0.0052       |
| 646  | Serpin B6 OS=Homo sapiens OX=9606 GN=SERPINB6 PE=1 SV=3 SPB6_HUM SERPINB6                                       |                          | 43 kDa    | 10     | 10     | 8       | 6       | 4       | 6       | 1.75        | 0.0132       |
| 855  | Cluster of Hypoxanthine-guanine phosphoribosyltransferase OS=Homo sapiens OX=9606 GN=HPRT_HUM HPRT1             |                          | 25 kDa    | 13     | 12     | 11      | 9       | 5       | 7       | 1.71        | 0.0179       |
| 1369 | Peptidyl-prolyl cis-trans isomerase NIMA-interacting 4 OS=Homo sapiens OX=9606 GN=PIN4_HUM PIN4                 |                          | 14 kDa    | 4      | 4      | 4       | 2       | 3       | 2       | 1.71        | 0.0075       |
| 1055 | Serine/threonine-protein phosphatase 4 regulatory subunit 1 OS=Homo sapiens OX=9606 GN=PPP4R1                   |                          | 107 kDa   | 6      | 6      | 5       | 3       | 3       | 4       | 1.70        | 0.0078       |
| 220  | Galectin-1 OS=Homo sapiens OX=9606 GN=LGALS1 PE=1 SV=2 LEG1_HUM LGALS1                                          |                          | 15 kDa    | 25     | 29     | 24      | 14      | 17      | 15      | 1.70        | 0.0038       |
| 671  | 40S ribosomal protein S15a OS=Homo sapiens OX=9606 GN=RPS15A PE=1 SV=2 RS15A_HU RPS15A                          |                          | 15 kDa    | 9      | 7      | 7       | 6       | 4       | 4       | 1.64        | 0.0335       |
| 302  | Transcription intermediary factor 1-beta OS=Homo sapiens OX=9606 GN=TRIM2 TIF1B_HUM TRIM28                      |                          | 89 kDa    | 25     | 22     | 25      | 12      | 16      | 16      | 1.64        | 0.0050       |
| 47   | DNA-dependent protein kinase catalytic subunit OS=Homo sapiens OX=9606 GN=PRKDC_HU PRKDC                        |                          | 469 kDa   | 75     | 56     | 49      | 35      | 37      | 39      | 1.62        | 0.0429       |
| 98   | U5 small nuclear ribonucleoprotein 200 kDa helicase OS=Homo sapiens OX=9606 GN=US20_HUM SNRNP200                |                          | 245 kDa   | 39     | 45     | 44      | 30      | 26      | 23      | 1.62        | 0.0040       |
| 929  | Double-strand break repair protein MRE11 OS=Homo sapiens OX=9606 GN=MRE11_HU MRE11                              |                          | 81 kDa    | 7      | 8      | 6       | 4       | 4       | 5       | 1.62        | 0.0161       |
| 319  | Splicing factor 3B subunit 2 OS=Homo sapiens OX=9606 GN=SF3B2 PE=1 SV=2 SF3B2_HUI SF3B2                         |                          | 100 kDa   | 14     | 11     | 12      | 6       | 9       | 8       | 1.61        | 0.0201       |
| 15   | Cluster of Glyceraldehyde-3-phosphate dehydrogenase OS=Homo sapiens OX=9606 GN=G3P_HUM GAPDH                    |                          | 36 kDa    | 133    | 159    | 109     | 102     | 70      | 78      | 1.60        | 0.0440       |
| 434  | Splicing factor 3A subunit 1 OS=Homo sapiens OX=9606 GN=SF3A1 PE=1 SV=1 SF3A1_HUI SF3A1                         |                          | 89 kDa    | 12     | 12     | 12      | 8       | 7       | 8       | 1.57        | 0.0002       |
| 130  | Non-POU domain-containing octamer-binding protein OS=Homo sapiens OX=9606 GN=NONO_HU NONO                       |                          | 54 kDa    | 40     | 27     | 31      | 23      | 20      | 20      | 1.56        | 0.0425       |
| 77   | Moesin OS=Homo sapiens OX=9606 GN=MSN PE=1 SV=3 MOES_HUM MSN                                                    |                          | 68 kDa    | 55     | 46     | 41      | 37      | 25      | 30      | 1.54        | 0.0362       |
| 352  | Serine/threonine-protein kinase PAK 2 OS=Homo sapiens OX=9606 GN=PAK2 PE=1 PAK2_HUM PAK2                        |                          | 58 kDa    | 16     | 12     | 12      | 9       | 8       | 9       | 1.54        | 0.0274       |
| 878  | Nuclear pore complex protein Nup160 OS=Homo sapiens OX=9606 GN=NUP160 NUP160_HU NUP160                          |                          | 162 kDa   | 9      | 8      | 9       | 6       | 6       | 5       | 1.53        | 0.0031       |
| 386  | Delta-1-pyrroline-5-carboxylate synthase OS=Homo sapiens OX=9606 GN=ALDH1 P5CS_HUM ALDH18A1                     |                          | 87 kDa    | 15     | 16     | 16      | 14      | 8       | 9       | 1.52        | 0.0474       |
| 565  | BAG family molecular chaperone regulator 3 OS=Homo sapiens OX=9606 GN=BAG3_HU BAG3                              |                          | 62 kDa    | 9      | 10     | 11      | 7       | 6       | 7       | 1.50        | 0.0075       |
| 195  | Cluster of Lamina-associated polypeptide 2, isoform alpha OS=Homo sapiens OX=9606 GN=LAP2A_HU TMPO              |                          | 75 kDa    | 29     | 36     | 29      | 20      | 17      | 26      | 1.49        | 0.0428       |
| 173  | Thioredoxin reductase 1, cytoplasmic OS=Homo sapiens OX=9606 GN=TXNRD1 TXNRD1_HU TXNRD1                         |                          | 71 kDa    | 33     | 24     | 31      | 22      | 17      | 20      | 1.49        | 0.0353       |
| 69   | Transketolase OS=Homo sapiens OX=9606 GN=TKT PE=1 SV=3 TKT_HUM TKT                                              |                          | 68 kDa    | 49     | 49     | 37      | 29      | 34      | 29      | 1.47        | 0.0297       |
| 786  | Pyridoxal kinase OS=Homo sapiens OX=9606 GN=PDXX PE=1 SV=1 PDXX_HUM PDXX                                        |                          | 35 kDa    | 7      | 8      | 7       | 6       | 4       | 5       | 1.47        | 0.0249       |
| 920  | 40S ribosomal protein S21 OS=Homo sapiens OX=9606 GN=RPS21 PE=1 SV=1 RS21_HUM RPS21                             |                          | 9 kDa     | 6      | 7      | 6       | 5       | 4       | 4       | 1.46        | 0.0132       |
| 549  | Nuclear pore complex protein Nup155 OS=Homo sapiens OX=9606 GN=NUP155 NUP155_HU NUP155                          |                          | 155 kDa   | 13     | 13     | 12      | 9       | 9       | 8       | 1.46        | 0.0011       |
| 1159 | Cluster of Golgi phosphoprotein 3 OS=Homo sapiens OX=9606 GN=GOLPH3 PE=1 SV=1 GOLPH3_HU GOLPH3                  |                          | 34 kDa    | 5      | 6      | 5       | 4       | 3       | 4       | 1.45        | 0.0241       |
| 1274 | E3 UFM1-protein ligase 1 OS=Homo sapiens OX=9606 GN=UFL1 PE=1 SV=2 UFL1_HUM UFL1                                |                          | 90 kDa    | 5      | 4      | 4       | 3       | 3       | 3       | 1.44        | 0.0161       |
| 633  | Protein NDRG1 OS=Homo sapiens OX=9606 GN=NDRG1 PE=1 SV=1 NDRG1_HU NDRG1                                         |                          | 43 kDa    | 12     | 11     | 10      | 8       | 9       | 6       | 1.43        | 0.0341       |
| 815  | Cell growth-regulating nucleolar protein OS=Homo sapiens OX=9606 GN=LYAR_HU LYAR                                |                          | 44 kDa    | 7      | 7      | 6       | 5       | 5       | 4       | 1.43        | 0.0132       |

Mass Spec Analysis of ICAM1-Regulated Proteins

| #    | Identified Proteins (2282/2286)                                                                                                  | Accession / Alternate ID | Molecular | siCON1 | siCON2 | siCON 3 | siICAM1 | siICAM2 | siICAM3 | Fold(con/si | Ttest 2-side |
|------|----------------------------------------------------------------------------------------------------------------------------------|--------------------------|-----------|--------|--------|---------|---------|---------|---------|-------------|--------------|
| 413  | Cluster of Histone H1.3 OS=Homo sapiens OX=9606 GN=HIST1H1D PE=1 SV=2 (H H13_HUM/HIST1H1D                                        |                          | 22 kDa    | 11     | 11     | 8       | 7       | 7       | 7       | 1.43        | 0.0399       |
| 525  | Proteasome subunit beta type-5 OS=Homo sapiens OX=9606 GN=PSMB5 PE=1 SV=3 (PSB5_HUM/PSMB5                                        |                          | 28 kDa    | 15     | 13     | 13      | 9       | 11      | 9       | 1.41        | 0.0132       |
| 842  | Eukaryotic translation initiation factor 1 OS=Homo sapiens OX=9606 GN=EIF1 PE=1 SV=3 (EIF1_HUM/EIF1                              |                          | 13 kDa    | 8      | 8      | 8       | 5       | 7       | 5       | 1.41        | 0.0249       |
| 819  | Replication protein A 32 kDa subunit OS=Homo sapiens OX=9606 GN=RPA2 PE=1 SV=3 (RFA2_HUM/RPA2                                    |                          | 29 kDa    | 6      | 7      | 8       | 5       | 5       | 5       | 1.40        | 0.0257       |
| 326  | Pre-mRNA-splicing factor ATP-dependent RNA helicase DHX15 OS=Homo sapiens OX=9606 GN=DHX15 PE=1 SV=3 (DHX15_HU/DHX15             |                          | 91 kDa    | 15     | 15     | 17      | 12      | 11      | 11      | 1.38        | 0.0044       |
| 628  | Cdc42-interacting protein 4 OS=Homo sapiens OX=9606 GN=TRIP10 PE=1 SV=3 (CIP4_HUM/TRIP10                                         |                          | 68 kDa    | 10     | 10     | 9       | 7       | 8       | 6       | 1.38        | 0.0161       |
| 564  | Sodium/potassium-transporting ATPase subunit beta-1 OS=Homo sapiens OX=9606 GN=ATP1B1 PE=1 SV=3 (ATP1B1_HU/ATP1B1                |                          | 35 kDa    | 9      | 8      | 9       | 7       | 6       | 6       | 1.37        | 0.0078       |
| 197  | Nuclear mitotic apparatus protein 1 OS=Homo sapiens OX=9606 GN=NUMA1 PE=1 SV=3 (NUMA1_H/NUMA1                                    |                          | 238 kDa   | 18     | 21     | 21      | 13      | 15      | 16      | 1.36        | 0.0161       |
| 87   | Cluster of Importin-5 OS=Homo sapiens OX=9606 GN=IPO5 PE=1 SV=4 (IPO5_HU/IPO5_HUM/IPO5                                           |                          | 124 kDa   | 49     | 45     | 44      | 38      | 31      | 33      | 1.35        | 0.0097       |
| 236  | Lamin-B2 OS=Homo sapiens OX=9606 GN=LMNB2 PE=1 SV=4 (LMNB2_HU/LMNB2                                                              |                          | 70 kDa    | 20     | 18     | 20      | 16      | 13      | 14      | 1.35        | 0.0106       |
| 117  | Programmed cell death 6-interacting protein OS=Homo sapiens OX=9606 GN=PDC6I PE=1 SV=3 (PDC6I_HU/PDC6I                           |                          | 96 kDa    | 36     | 37     | 37      | 27      | 28      | 27      | 1.34        | 0.0000       |
| 213  | Cluster of ATP-dependent 6-phosphofructokinase, platelet type OS=Homo sapiens OX=9606 GN=PFKP PE=1 SV=3 (PFKP_HU/PFKP            |                          | 86 kDa    | 26     | 25     | 29      | 21      | 22      | 17      | 1.33        | 0.0265       |
| 581  | Carbonyl reductase [NADPH] 1 OS=Homo sapiens OX=9606 GN=CBR1 PE=1 SV=3 (CBR1_HUM/CBR1                                            |                          | 30 kDa    | 16     | 18     | 18      | 15      | 11      | 13      | 1.33        | 0.0314       |
| 17   | Cluster of Talin-1 OS=Homo sapiens OX=9606 GN=TLN1 PE=1 SV=3 (TLN1_HUM/TLN1                                                      |                          | 270 kDa   | 131    | 123    | 110     | 91      | 91      | 92      | 1.33        | 0.0081       |
| 216  | Macrophage-capping protein OS=Homo sapiens OX=9606 GN=CAPG PE=1 SV=2 (CAPG_HUM/CAPG                                              |                          | 38 kDa    | 26     | 25     | 27      | 18      | 22      | 20      | 1.30        | 0.0097       |
| 71   | ATP-dependent RNA helicase A OS=Homo sapiens OX=9606 GN=DHX9 PE=1 SV=2 (DHX9_HU/DHX9                                             |                          | 141 kDa   | 47     | 43     | 39      | 35      | 29      | 36      | 1.29        | 0.0384       |
| 246  | Calponin-3 OS=Homo sapiens OX=9606 GN=CNN3 PE=1 SV=1 (CNN3_HU/CNN3                                                               |                          | 36 kDa    | 23     | 20     | 22      | 16      | 17      | 18      | 1.27        | 0.0114       |
| 1048 | Hydroxysteroid dehydrogenase-like protein 2 OS=Homo sapiens OX=9606 GN=HSDL2 PE=1 SV=3 (HSDL2_HU/HSDL2                           |                          | 45 kDa    | 7      | 6      | 6       | 5       | 5       | 5       | 1.27        | 0.0161       |
| 185  | Cluster of Polypyrimidine tract-binding protein 1 OS=Homo sapiens OX=9606 GN=PTBP1 PE=1 SV=3 (PTBP1_HU/PTBP1                     |                          | 57 kDa    | 24     | 23     | 27      | 19      | 20      | 20      | 1.25        | 0.0160       |
| 264  | Eukaryotic translation initiation factor 3 subunit M OS=Homo sapiens OX=9606 GN=EIF3M PE=1 SV=3 (EIF3M_HU/EIF3M                  |                          | 43 kDa    | 23     | 24     | 24      | 19      | 19      | 19      | 1.25        | 0.0002       |
| 499  | Ribosomal L1 domain-containing protein 1 OS=Homo sapiens OX=9606 GN=RSL1D1 PE=1 SV=3 (RSL1D1_HU/RSL1D1                           |                          | 55 kDa    | 12     | 11     | 13      | 9       | 10      | 10      | 1.24        | 0.0249       |
| 560  | Gamma-enolase OS=Homo sapiens OX=9606 GN=ENO2 PE=1 SV=3 (ENO2_HU/ENO2                                                            |                          | 47 kDa    | 48     | 45     | 41      | 40      | 32      | 36      | 1.24        | 0.0478       |
| 251  | Cluster of Calnexin OS=Homo sapiens OX=9606 GN=CANX PE=1 SV=2 (CALX_HUM/CANX                                                     |                          | 68 kDa    | 28     | 29     | 28      | 24      | 22      | 23      | 1.23        | 0.0013       |
| 44   | Elongation factor 1-gamma OS=Homo sapiens OX=9606 GN=EEF1G PE=1 SV=3 (EEF1G_HUM/EEF1G                                            |                          | 50 kDa    | 37     | 34     | 37      | 31      | 26      | 31      | 1.23        | 0.0265       |
| 5    | Cluster of Heat shock protein HSP 90-beta OS=Homo sapiens OX=9606 GN=HSP90B PE=1 SV=3 (HSP90B_HU/HSP90AB1                        |                          | 83 kDa    | 310    | 264    | 274     | 232     | 225     | 241     | 1.21        | 0.0273       |
| 13   | Cluster of Spectrin beta chain, non-erythrocytic 1 OS=Homo sapiens OX=9606 GN=SPTBN1 PE=1 SV=3 (SPTBN1_HU/SPTBN1                 |                          | 275 kDa   | 119    | 111    | 105     | 95      | 87      | 94      | 1.21        | 0.0146       |
| 32   | Protein-glutamine gamma-glutamyltransferase 2 OS=Homo sapiens OX=9606 GN=TGM2 PE=1 SV=3 (TGM2_HU/TGM2                            |                          | 77 kDa    | 44     | 45     | 49      | 39      | 37      | 38      | 1.21        | 0.0080       |
| 8    | Cluster of 14-3-3 protein epsilon OS=Homo sapiens OX=9606 GN=YWHAE PE=1 SV=3 (YWHAE_HU/YWHAE                                     |                          | 29 kDa    | 183    | 175    | 187     | 145     | 152     | 156     | 1.20        | 0.0030       |
| 147  | Coatomer subunit beta OS=Homo sapiens OX=9606 GN=COPB1 PE=1 SV=3 (COPB1_HU/COPB1                                                 |                          | 107 kDa   | 28     | 28     | 28      | 23      | 23      | 24      | 1.20        | 0.0002       |
| 210  | 40S ribosomal protein S2 OS=Homo sapiens OX=9606 GN=RPS2 PE=1 SV=2 (RPS2_HU/RPS2                                                 |                          | 31 kDa    | 15     | 14     | 15      | 12      | 13      | 12      | 1.19        | 0.0078       |
| 609  | Cluster of Scaffold attachment factor B1 OS=Homo sapiens OX=9606 GN=SAFB PE=1 SV=3 (SAFB_HU/SAFB                                 |                          | 103 kDa   | 9      | 9      | 9       | 8       | 8       | 7       | 1.17        | 0.0161       |
| 605  | Cytochrome c OS=Homo sapiens OX=9606 GN=CYCS PE=1 SV=2 (CYC_HUM/CYCS                                                             |                          | 12 kDa    | 10     | 9      | 10      | 8       | 8       | 9       | 1.16        | 0.0474       |
| 61   | Cluster of Probable ATP-dependent RNA helicase DDX5 OS=Homo sapiens OX=9606 GN=DDX5 PE=1 SV=3 (DDX5_HU/DDX5                      |                          | 69 kDa    | 65     | 62     | 64      | 54      | 57      | 54      | 1.16        | 0.0029       |
| 39   | Cluster of Elongation factor 1-alpha 1 OS=Homo sapiens OX=9606 GN=EEF1A1 PE=1 SV=3 (EEF1A1_HU/EEF1A1                             |                          | 50 kDa    | 212    | 226    | 217     | 199     | 181     | 186     | 1.16        | 0.0117       |
| 657  | Protein SEC13 homolog OS=Homo sapiens OX=9606 GN=SEC13 PE=1 SV=3 (SEC13_HU/SEC13                                                 |                          | 36 kDa    | 12     | 12     | 13      | 11      | 11      | 10      | 1.16        | 0.0241       |
| 125  | 4F2 cell-surface antigen heavy chain OS=Homo sapiens OX=9606 GN=SLC3A2 PE=1 SV=3 (4F2_HU/SLC3A2                                  |                          | 68 kDa    | 29     | 26     | 26      | 24      | 24      | 23      | 1.14        | 0.0341       |
| 133  | Coatomer subunit gamma-1 OS=Homo sapiens OX=9606 GN=COPG1 PE=1 SV=1 (COPG1_HU/COPG1                                              |                          | 98 kDa    | 38     | 40     | 40      | 34      | 34      | 36      | 1.13        | 0.0078       |
| 252  | Caveolae-associated protein 1 OS=Homo sapiens OX=9606 GN=CAVIN1 PE=1 SV=3 (CAVIN1_HU/CAVIN1                                      |                          | 43 kDa    | 22     | 25     | 23      | 21      | 21      | 20      | 1.13        | 0.0474       |
| 375  | Lysine--tRNA ligase OS=Homo sapiens OX=9606 GN=KARS PE=1 SV=3 (SYK_HUM/KARS                                                      |                          | 68 kDa    | 12     | 12     | 12      | 11      | 11      | 10      | 1.13        | 0.0161       |
| 321  | Ras GTPase-activating protein-binding protein 1 OS=Homo sapiens OX=9606 GN=G3BP1 PE=1 SV=3 (G3BP1_HU/G3BP1                       |                          | 52 kDa    | 18     | 19     | 19      | 17      | 16      | 17      | 1.12        | 0.0132       |
| 92   | Glycine--tRNA ligase OS=Homo sapiens OX=9606 GN=GARS PE=1 SV=3 (GARS_HU/GARS                                                     |                          | 83 kDa    | 32     | 34     | 33      | 35      | 35      | 36      | 0.93        | 0.0249       |
| 129  | Cathepsin D OS=Homo sapiens OX=9606 GN=CTSD PE=1 SV=1 (CATD_HU/CTSD                                                              |                          | 45 kDa    | 28     | 25     | 27      | 29      | 30      | 30      | 0.90        | 0.0335       |
| 16   | 60 kDa heat shock protein, mitochondrial OS=Homo sapiens OX=9606 GN=HSPD1 PE=1 SV=3 (HSPD1_HU/HSPD1                              |                          | 61 kDa    | 102    | 105    | 107     | 124     | 116     | 112     | 0.89        | 0.0294       |
| 74   | Stress-induced-phosphoprotein 1 OS=Homo sapiens OX=9606 GN=STIP1 PE=1 SV=3 (STIP1_HU/STIP1                                       |                          | 63 kDa    | 24     | 25     | 23      | 27      | 27      | 29      | 0.87        | 0.0142       |
| 279  | Integrin alpha-6 OS=Homo sapiens OX=9606 GN=ITGA6 PE=1 SV=5 (ITGA6_HU/ITGA6                                                      |                          | 127 kDa   | 16     | 18     | 16      | 19      | 20      | 19      | 0.86        | 0.0232       |
| 701  | Protein transport protein Sec23B OS=Homo sapiens OX=9606 GN=SEC23B PE=1 SV=3 (SEC23B_HU/SEC23B                                   |                          | 86 kDa    | 9      | 10     | 10      | 11      | 12      | 11      | 0.85        | 0.0241       |
| 25   | Calreticulin OS=Homo sapiens OX=9606 GN=CALR PE=1 SV=1 (CALR_HU/CALR                                                             |                          | 48 kDa    | 51     | 56     | 61      | 73      | 66      | 70      | 0.80        | 0.0179       |
| 82   | Integrin beta-1 OS=Homo sapiens OX=9606 GN=ITGB1 PE=1 SV=2 (ITGB1_HU/ITGB1                                                       |                          | 88 kDa    | 33     | 30     | 27      | 36      | 38      | 41      | 0.78        | 0.0211       |
| 274  | Succinate dehydrogenase [ubiquinone] flavoprotein subunit, mitochondrial OS=Homo sapiens OX=9606 GN=SDHA PE=1 SV=3 (SDHA_HU/SDHA |                          | 73 kDa    | 18     | 18     | 17      | 22      | 26      | 22      | 0.76        | 0.0146       |
| 1106 | 60S acidic ribosomal protein P1 OS=Homo sapiens OX=9606 GN=RPLP1 PE=1 SV=3 (RPLP1_HU/RPLP1                                       |                          | 12 kDa    | 5      | 5      | 5       | 6       | 7       | 7       | 0.75        | 0.0075       |

Mass Spec Analysis of ICAM1-Regulated Proteins

| #    | Identified Proteins (2282/2286)                                                                              | Accession   Alternate ID | Molecular Weight | siCON1 | siCON2 | siCON 3 | siICAM1 | siICAM2 | siICAM3 | Fold(con/si | Ttest 2-side |
|------|--------------------------------------------------------------------------------------------------------------|--------------------------|------------------|--------|--------|---------|---------|---------|---------|-------------|--------------|
| 1087 | Cofilin-2 OS=Homo sapiens OX=9606 GN=CFL2 PE=1 SV=1                                                          | COF2_HUN CFL2            | 19 kDa           | 12     | 15     | 15      | 19      | 18      | 19      | 0.75        | 0.0114       |
| 342  | LIM domain and actin-binding protein 1 OS=Homo sapiens OX=9606 GN=LIMA1   LIMA1_HU LIMA1                     | LIMA1_HU LIMA1           | 85 kDa           | 11     | 14     | 10      | 16      | 17      | 15      | 0.73        | 0.0314       |
| 20   | Cluster of Keratin, type I cytoskeletal 18 OS=Homo sapiens OX=9606 GN=KRT18   K1C18_HU KRT18                 | K1C18_HU KRT18           | 48 kDa           | 106    | 81     | 101     | 134     | 129     | 132     | 0.73        | 0.0101       |
| 728  | Protein PBDC1 OS=Homo sapiens OX=9606 GN=PBDC1 PE=1 SV=1                                                     | PBDC1_HU PBDC1           | 26 kDa           | 6      | 7      | 7       | 9       | 9       | 10      | 0.71        | 0.0048       |
| 116  | Major vault protein OS=Homo sapiens OX=9606 GN=MVP PE=1 SV=4                                                 | MVP_HUM MVP              | 99 kDa           | 18     | 21     | 23      | 31      | 27      | 30      | 0.70        | 0.0101       |
| 542  | Paraspeckle component 1 OS=Homo sapiens OX=9606 GN=PSPC1 PE=1 SV=1                                           | PSPC1_HUI PSPC1          | 59 kDa           | 7      | 9      | 9       | 12      | 12      | 12      | 0.69        | 0.0053       |
| 1121 | Protein transport protein Sec24C OS=Homo sapiens OX=9606 GN=SEC24C PE=1 SV=1                                 | SEC24C_HUI SEC24C        | 118 kDa          | 3      | 4      | 3       | 5       | 5       | 5       | 0.67        | 0.0075       |
| 1393 | Vitronectin OS=Homo sapiens OX=9606 GN=VTN PE=1 SV=1                                                         | VTNC_HUN VTN             | 54 kDa           | 2      | 2      | 3       | 4       | 3       | 4       | 0.64        | 0.0474       |
| 493  | Cluster of V-type proton ATPase subunit B, brain isoform OS=Homo sapiens OX=9606 GN=VATB2_HU ATP6V1B2        | VATB2_HU ATP6V1B2        | 57 kDa           | 7      | 11     | 14      | 19      | 17      | 16      | 0.62        | 0.0394       |
| 1223 | Programmed cell death protein 10 OS=Homo sapiens OX=9606 GN=PDCD10 PE=1 SV=1                                 | PDCD10_HU PDCD10         | 25 kDa           | 2      | 2      | 2       | 3       | 3       | 4       | 0.60        | 0.0161       |
| 320  | Zinc finger protein 185 OS=Homo sapiens OX=9606 GN=ZNF185 PE=1 SV=3                                          | ZNF185_HU ZNF185         | 74 kDa           | 9      | 15     | 12      | 19      | 19      | 22      | 0.60        | 0.0161       |
| 941  | Diablo homolog, mitochondrial OS=Homo sapiens OX=9606 GN=DIABLO PE=1 SV=1                                    | DIABLO_HL DIABLO         | 27 kDa           | 2      | 5      | 4       | 6       | 6       | 7       | 0.58        | 0.0474       |
| 858  | Mitochondrial carrier homolog 2 OS=Homo sapiens OX=9606 GN=MTCH2 PE=1 SV=1                                   | MTCH2_HU MTCH2           | 33 kDa           | 5      | 3      | 3       | 7       | 5       | 7       | 0.58        | 0.0474       |
| 783  | Ferritin light chain OS=Homo sapiens OX=9606 GN=FTL PE=1 SV=2                                                | FTL_HUM FTL              | 20 kDa           | 3      | 3      | 2       | 5       | 4       | 6       | 0.53        | 0.0249       |
| 761  | Plasminogen activator inhibitor 1 OS=Homo sapiens OX=9606 GN=SERPINE1 PE=1 SV=1                              | SERPINE1_HU SERPINE1     | 45 kDa           | 2      | 4      | 6       | 8       | 8       | 7       | 0.52        | 0.0380       |
| 612  | CD2-associated protein OS=Homo sapiens OX=9606 GN=CD2AP PE=1 SV=1                                            | CD2AP_HU CD2AP           | 71 kDa           | 4      | 6      | 3       | 8       | 8       | 9       | 0.52        | 0.0132       |
| 714  | Glutathione synthetase OS=Homo sapiens OX=9606 GN=GSS PE=1 SV=1                                              | GSSH_HUN GSS             | 52 kDa           | 6      | 3      | 4       | 7       | 8       | 10      | 0.52        | 0.0327       |
| 1141 | Thioredoxin domain-containing protein 12 OS=Homo sapiens OX=9606 GN=TXNIP PE=1 SV=1                          | TXNIP_HU TXNIP           | 19 kDa           | 2      | 2      | 3       | 5       | 4       | 5       | 0.50        | 0.0078       |
| 998  | 45 kDa calcium-binding protein OS=Homo sapiens OX=9606 GN=SDF4 PE=1 SV=1                                     | SDF4_HU SDF4             | 42 kDa           | 4      | 3      | 5       | 8       | 8       | 9       | 0.48        | 0.0029       |
| 945  | Nuclear receptor coactivator 4 OS=Homo sapiens OX=9606 GN=NCOA4 PE=1 SV=1                                    | NCOA4_HL NCOA4           | 70 kDa           | 4      | 3      | 3       | 6       | 9       | 6       | 0.48        | 0.0254       |
| 1112 | Desmoglein-2 OS=Homo sapiens OX=9606 GN=DSG2 PE=1 SV=2                                                       | DSG2_HUN DSG2            | 122 kDa          | 1      | 3      | 4       | 6       | 5       | 6       | 0.47        | 0.0335       |
| 1342 | Guanine nucleotide-binding protein G(I)/G(S)/G(O) subunit gamma-12 OS=Homo sapiens OX=9606 GN=GBG12_HU GNG12 | GBG12_HU GNG12           | 8 kDa            | 2      | 2      | 2       | 4       | 5       | 4       | 0.46        | 0.0022       |
| 1360 | Trans-Golgi network integral membrane protein 2 OS=Homo sapiens OX=9606 GN=TGOLN2_HL TGOLN2                  | TGOLN2_HL TGOLN2         | 51 kDa           | 2      | 2      | 2       | 5       | 4       | 4       | 0.46        | 0.0022       |
| 1198 | Cluster of Ribonucleoside-diphosphate reductase large subunit OS=Homo sapiens OX=9606 GN=RIR1_HU RRM1        | RIR1_HU RRM1             | 90 kDa           | 1      | 3      | 3       | 7       | 6       | 4       | 0.41        | 0.0394       |
| 1173 | Tumor protein D52 OS=Homo sapiens OX=9606 GN=TPD52 PE=1 SV=2                                                 | TPD52_HU TPD52           | 24 kDa           | 2      | 3      | 2       | 6       | 6       | 5       | 0.41        | 0.0021       |
| 986  | Sideroflexin-1 OS=Homo sapiens OX=9606 GN=SFXN1 PE=1 SV=4                                                    | SFXN1_HU SFXN1           | 36 kDa           | 2      | 3      | 4       | 6       | 10      | 6       | 0.41        | 0.0406       |
| 1235 | Cluster of C-Jun-amino-terminal kinase-interacting protein 4 OS=Homo sapiens OX=9606 GN=JIP4_HU SPAG9        | JIP4_HU SPAG9            | 146 kDa          | 1      | 2      | 2       | 6       | 4       | 3       | 0.38        | 0.0474       |
| 1062 | Pseudouridine-5'-phosphatase OS=Homo sapiens OX=9606 GN=PUDP PE=1 SV=3                                       | HDHD1_HU PUDP            | 25 kDa           | 3      | 4      | 1       | 7       | 6       | 8       | 0.38        | 0.0147       |
| 1097 | Septin-10 OS=Homo sapiens OX=9606 GN=SEPT10 PE=1 SV=2                                                        | SEPT10_HUI               | 53 kDa           | 2      | 2      | 3       | 8       | 7       | 4       | 0.37        | 0.0327       |
| 1712 | Acyl-CoA dehydrogenase family member 9, mitochondrial OS=Homo sapiens OX=9606 GN=ACAD9_HU ACAD9              | ACAD9_HU ACAD9           | 69 kDa           | 0      | 1      | 1       | 2       | 2       | 2       | 0.33        | 0.0161       |
| 351  | Protein CYR61 OS=Homo sapiens OX=9606 GN=CYR61 PE=1 SV=1                                                     | CYR61_HU CYR61           | 42 kDa           | 7      | 3      | 8       | 18      | 20      | 17      | 0.33        | 0.0022       |
| 971  | GrpE protein homolog 1, mitochondrial OS=Homo sapiens OX=9606 GN=GRPEL1_HU GRPEL1                            | GRPEL1_HU GRPEL1         | 24 kDa           | 2      | 3      | 2       | 9       | 7       | 6       | 0.32        | 0.0061       |
| 1709 | Vacuolar protein sorting-associated protein 4B OS=Homo sapiens OX=9606 GN=VPS4B_HU VPS4B                     | VPS4B_HU VPS4B           | 49 kDa           | 1      | 1      | 0       | 2       | 3       | 2       | 0.29        | 0.0241       |
| 630  | Integrin alpha-5 OS=Homo sapiens OX=9606 GN=ITGA5 PE=1 SV=2                                                  | ITGA5_HUM ITGA5          | 115 kDa          | 4      | 2      | 3       | 12      | 7       | 13      | 0.28        | 0.0169       |
| 1510 | Hemoglobin subunit alpha OS=Homo sapiens OX=9606 GN=HBA1 PE=1 SV=2                                           | HBA1_HUM HBA1            | 15 kDa           | 1      | 1      | 1       | 4       | 3       | 4       | 0.27        | 0.0013       |
| 1045 | Guanine nucleotide-binding protein-like 3 OS=Homo sapiens OX=9606 GN=GNL3_HU GNL3                            | GNL3_HU GNL3             | 62 kDa           | 1      | 1      | 3       | 4       | 9       | 6       | 0.26        | 0.0433       |
| 1540 | Protein AATF OS=Homo sapiens OX=9606 GN=AATF PE=1 SV=1                                                       | AATF_HUN AATF            | 63 kDa           |        | 1      | 0       | 3       | 2       | 2       | 0.21        | 0.0486       |

**Supplementary Table 4: Stemness Genes**

|          |         |        |
|----------|---------|--------|
| ACTA2    | EMP1    | NYNRIN |
| ADGRG1   | EPHA4   | OLR1   |
| AKR1C3   | FAM30A  | POU5F1 |
| AKT1     | FGFR2   | PROM1  |
| ALDH1A1  | FOXO3   | PTCH1  |
| ANRF3    | FSCN1   | RNF43  |
| ARHGAP22 | GAS1    | RSPO1  |
| AXIN2    | GLI1    | RSPO2  |
| BCL2     | GLI2    | RTK2   |
| BCL2L11  | HES1    | SAN12  |
| BEX3     | HIF2    | SAV1   |
| BIM      | IGFBP6  | SMAD3  |
| BOC      | ITGA6   | SMIM24 |
| CAV1     | JAG1    | SMO    |
| CD24     | JAG2    | SNAI1  |
| CD34     | KLF4    | SOCS2  |
| CD44     | KLF5    | SOX2   |
| CDH1     | KRT14   | SPARC  |
| CDH2     | KRT17   | SPON1  |
| CDH3     | KRT5    | STK3   |
| CDK6     | LAPTM4B | TAZ    |
| CDON     | LAT     | TGM2   |
| COL1A2   | LRG5    | TP53   |
| CPXM1    | MMRN1   | TP63   |
| CTNNB1   | MST2    | TSPAN8 |
| CXCL8    | MYC     | TWIST1 |
| DAND5    | MYLK    | VCAM1  |
| DLL1     | NANOG   | VIM    |
| DLL4     | NFYA    | YAP    |
| DNMT3B   | NOTCH2  | YY1AP1 |
| DPP4     | NOTCH3  | ZBTB46 |
| DPYSL3   | NOTCH4  | ZEB1   |
| EGFR     | NTRK2   |        |
